# Supplementary material for: A First-line management team’s strategies for sustaining resilience in a specialised intensive care unit—a qualitative observational study
Source: PubMed Central journal article supplement (PMC7970205; doi:10.1136/bmjopen-2020-040358), 2021-03-15
Supplement: bmjopen-2020-040358.draft_revisions.pdf [file bmjopen-2020-040358.draft_revisions.pdf]

# BMJ Open

BMJ Open is committed to open peer review. As part of this commitment we make the peer review history of every article we publish publicly available.

When an article is published we post the peer reviewers' comments and the authors' responses online. We also post the versions of the paper that were used during peer review. These are the versions that the peer review comments apply to.

The versions of the paper that follow are the versions that were submitted during the peer review process. They are not the versions of record or the final published versions. They should not be cited or distributed as the published version of this manuscript.

BMJ Open is an open access journal and the full, final, typeset and author-corrected version of record of the manuscript is available on our site with no access controls, subscription charges or pay-per-view fees (<http://bmjopen.bmj.com>).

If you have any questions on BMJ Open's open peer review process please email [info.bmjopen@bmj.com](mailto:info.bmjopen@bmj.com)

# BMJ Open

## A FIRST LINE MANAGEMENT TEAM 'S STRATEGIES FOR SUSTAINING RESILIENCE IN A SPECIALISED INTENSIVE CARE UNIT – AN OBSERVATIONAL STUDY

|                               |                                                                                                                                                                                                                                                                                                                                                                                                      |
|-------------------------------|------------------------------------------------------------------------------------------------------------------------------------------------------------------------------------------------------------------------------------------------------------------------------------------------------------------------------------------------------------------------------------------------------|
| Journal:                      | <i>BMJ Open</i>                                                                                                                                                                                                                                                                                                                                                                                      |
| Manuscript ID                 | bmjopen-2020-040358                                                                                                                                                                                                                                                                                                                                                                                  |
| Article Type:                 | Original research                                                                                                                                                                                                                                                                                                                                                                                    |
| Date Submitted by the Author: | 11-May-2020                                                                                                                                                                                                                                                                                                                                                                                          |
| Complete List of Authors:     | Hybinette, Karl; Karolinska Institutet Department of Learning Informatics Management and Ethic; Karolinska Hospital, Astrid Lindgrens Childrens Hospital<br>Pukk Härenstam, Karin; Karolinska Institutet Department of Learning Informatics Management and Ethic; Karolinska University Hospital, Paediatric Emergency Department<br>Ekstedt, Mirjam; Karolinska Institutet, LIME; Linneuniversitet, |
| Keywords:                     | QUALITATIVE RESEARCH, HEALTH SERVICES ADMINISTRATION & MANAGEMENT, Health policy < HEALTH SERVICES ADMINISTRATION & MANAGEMENT, Organisation of health services < HEALTH SERVICES ADMINISTRATION & MANAGEMENT, Risk management < HEALTH SERVICES ADMINISTRATION & MANAGEMENT                                                                                                                         |
|                               |                                                                                                                                                                                                                                                                                                                                                                                                      |

SCHOLARONE™  
Manuscripts

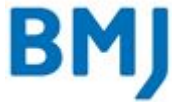

I, the Submitting Author has the right to grant and does grant on behalf of all authors of the Work (as defined in the below author licence), an exclusive licence and/or a non-exclusive licence for contributions from authors who are: i) UK Crown employees; ii) where BMJ has agreed a CC-BY licence shall apply, and/or iii) in accordance with the terms applicable for US Federal Government officers or employees acting as part of their official duties; on a worldwide, perpetual, irrevocable, royalty-free basis to BMJ Publishing Group Ltd ("BMJ") its licensees and where the relevant Journal is co-owned by BMJ to the co-owners of the Journal, to publish the Work in this journal and any other BMJ products and to exploit all rights, as set out in our [licence](#).

The Submitting Author accepts and understands that any supply made under these terms is made by BMJ to the Submitting Author unless you are acting as an employee on behalf of your employer or a postgraduate student of an affiliated institution which is paying any applicable article publishing charge ("APC") for Open Access articles. Where the Submitting Author wishes to make the Work available on an Open Access basis (and intends to pay the relevant APC), the terms of reuse of such Open Access shall be governed by a Creative Commons licence – details of these licences and which [Creative Commons](#) licence will apply to this Work are set out in our licence referred to above.

Other than as permitted in any relevant BMJ Author's Self Archiving Policies, I confirm this Work has not been accepted for publication elsewhere, is not being considered for publication elsewhere and does not duplicate material already published. I confirm all authors consent to publication of this Work and authorise the granting of this licence.

1  
2  
3 1 **A FIRST LINE MANAGEMENT TEAM'S STRATEGIES FOR SUSTAINING RESILIENCE IN A**  
4 2 **SPECIALISED INTENSIVE CARE UNIT – AN OBSERVATIONAL STUDY**  
5 3  
6  
7

8 4 **Authors**  
9

10 5 Karl Hybinette<sup>1,2</sup>, Karin Pukk Härenstam<sup>1-3</sup>, Mirjam Ekstedt<sup>1,4</sup>  
11  
12

13 6 **Affiliation**  
14

15  
16 7 <sup>1</sup> Department of Learning, Informatics, Management and Ethics, Karolinska Institutet, Stockholm,  
17  
18 8 Sweden  
19

20 9 <sup>2</sup> Theme Children & Women's Health, Karolinska University Hospital, Stockholm, Sweden  
21

22 10 <sup>3</sup> Paediatric Emergency Department, Karolinska University Hospital, Stockholm, Sweden  
23

24  
25 11 <sup>4</sup> Department of Health and Caring Sciences, Linnaeus University, Kalmar, Sweden  
26  
27

28 12 **Corresponding author**  
29

30 13 Karl Hybinette  
31

32 14 Karolinska Institutet  
33

34 15 Department of Learning, Informatics, Management and Ethics,  
35

36 16 Tomtebodavägen 18 A  
37

38 17 SE 171 77 Stockholm  
39

40  
41 18 E-mail: hybinette.karl@ki.se  
42

43 19 Phone: 0046704297173  
44  
45  
46  
47  
48  
49 21  
50  
51  
52  
53  
54  
55  
56  
57  
58  
59  
60

## 22 ABSTRACT

### 23 Objectives

24 Acute care units manage high risk patients at the limits of scientifically established treatments and  
25 organisational constraints aiming to balance reliability to standards with the needs of situational  
26 adaptation (resilience). First line managers have a central role of coordinating clinical care. Any systemic  
27 brittleness will be evident only in retrospect through for example care quality measures and accident  
28 statistics, which poses a challenge to understanding what successful managerial strategies for  
29 adaptation are and how they could be improved. The managerial work of balancing reliability and  
30 adaptation is only partially understood. This study aims to explore and describe how system resilience is  
31 sustained by naturally occurring coordination performed in situ by a management team under variable  
32 circumstances.

### 33 Design

34 An explorative observational study using shadowing observations of coordination analysed with  
35 inductive-deductive content analysis from a perspective of resilience engineering (RE).

### 36 Participants

37 A team of managers in a neonatal intensive care unit (i.e. clinical coordinators, head nurses, senior  
38 medical doctors).

### 39 Results

40 Managers focused on maintaining coherence in escalating problematic situations by facilitating  
41 teamwork through goalsetting, problem-solving and circumventing the technical systems' limitations in  
42 creating situational awareness. The results describe a functional relationship between the units' level of  
43 manoeuvrability and a progression of strategies for enabling adaptations for safe performance,  
44 expressed through recurring patterns of adaptation when the unit were subjected to pressure.

## 45 **Conclusions**

46 Coordination supports a coherent goal setting by increased team collaboration and is supported by team  
47 members ability to predict the behavior of each other. Our findings suggest that resilience is possible to  
48 engineer by supporting and training managers to maintain cohesion, manage system boundaries,  
49 adapting the structure and roles of the coordinating management team and shifting between  
50 information sources in response to the variability of the systems operating point (how tightly coupled  
51 the system is).

## 52 **Keywords**

53 Qualitative research, Health services administration & management, Health policy, Organisation of  
54 health services, Risk management

## 55 **Wordcount**

56 4417

## 57 **Strengths and limitations of this study**

- 58 • Several iterations of data collection and analysis allowed for an initially wide and later more  
59 focused data collection that opened opportunities for the researchers to follow up on specific  
60 findings.
- 61 • The explorative ethnographic design allowed for a deeper understanding of the underspecified  
62 (hidden) work of first line managers.
- 63 • This is a single center study of a specialised unit with a specific patient clientele that cannot be  
64 cared for by any other type of unit which might affect the generalizability and transferability of  
65 results.

1  
2  
3  
4  
5  
6  
7  
8  
9  
10  
11  
12  
13  
14  
15  
16  
17  
18  
19  
20  
21  
22  
23  
24  
25  
26  
27  
28  
29  
30  
31  
32  
33  
34  
35  
36  
37  
38  
39  
40  
41  
42  
43  
44  
45  
46  
47  
48  
49  
50  
51  
52  
53  
54  
55  
56  
57  
58  
59  
60

- 66 • The first author (KH) who conducted the fieldwork is an experienced intensive care nurse. The  
67 familiarity with the specific type of work may have affected the interpretations drawn in this  
68 study.

For peer review only

## 69 BACKGROUND

70 The Neonatal Intensive Care Unit (NICU) continuously evolves by incorporating new care practises,  
71 organisational models and patient groups (1). It is a complex adaptive system (CAS) because of its many  
72 interrelated parts, goals and relationships where highly specialised care is fragmented over many places,  
73 purposes and teams of professionals (2). Work is done at the frontiers of scientifically established  
74 treatments, frequently pushing the organization to its limits (3). The difficulty of maintaining quality and  
75 safety is a persistent problem for everyday clinical work (ECW) in this high risk environment that is  
76 continuously exposed to acute admissions, staff shortage and rapidly deteriorating patients with life-  
77 threatening conditions (4,5).

78 Patient safety is often defined as an absence of certain outcomes such as ‘the absence of preventable  
79 harm to a patient during the process of health care’ (6) or ‘the absence of the potential for, or the  
80 occurrence of, health care associated injury to patients, created by avoiding medical errors and taking  
81 action to prevent errors from causing injury’ (7,8). However, during the last decades of patient safety  
82 research a movement have emerged towards an inclusive view of supporting the healthcare systems’  
83 ability to sustain required (normal) operations complimentary to traditional error reduction and fault-  
84 finding, the resilience engineering (RE) perspective (9).

85 Resilience in healthcare is defined as ‘the ability of the health care system (a clinic, a ward, a hospital, a  
86 country) to adjust its functioning prior to, during, or following events (changes, disturbances and  
87 opportunities), and thereby sustain required operations under both expected and unexpected  
88 conditions’ [7, p. xvii]. An important point made within the RE perspective is that safety in ECW can be  
89 managed by a combination of structure and control on one hand (i.e. Safety -1) and adaptive behaviour  
90 on the other (Safety -2) (10).



1  
2  
3 91 Research on resilience in healthcare provides two important insights for how to enhance its capacity for  
4  
5 92 resilient adaptations. Firstly, by making early investments in staff's expertise, deep domain knowledge,  
6  
7 93 clinical training and the maintenance of a good workplace culture and thus creating preconditions for  
8  
9 94 teams to manoeuvre the system even under unexpected situations (11). Secondly is the understanding  
10  
11 95 that successful as well as unsuccessful outcomes emerge from the fluid arrangement of system  
12  
13 96 components (coordination) (12). Coordination is defined as "*...the deliberate and orderly alignment or*  
14  
15 97 *adjustment of partners' actions to achieve jointly determined goals* (13). People who perform  
16  
17 98 coordinative work are a part of a "*process by which team resources, activities, and responses are*  
18  
19 99 *organized to ensure that tasks are integrated, synchronized, and completed within established temporal*  
20  
21 100 *constraints*" (14)  
22  
23  
24  
25

26  
27 101 Although coordinating functions are an integral part of everyday healthcare management in domains  
28  
29 102 such as surgery, anesthesia, emergency and pediatric intensive care at the level of small multi-  
30  
31 103 professional clinical teams (15–18), we know very little about how *managers* learn the strategies they  
32  
33 104 use and which of the work practices they develop that are successful (19,20). Specifically multiteam  
34  
35 105 coordination (i.e coordination within and between multiple teams) is not as empirically supported in  
36  
37 106 highly specialised acute- or intensive care as in primary care with chronic patients (21) or teams in other  
38  
39 107 high-risk domains such as aviation, military and maritime safety (22).  
40  
41  
42

43 108 Therefore, it is important to further explore the performance of coordination within and between  
44  
45 109 multiple teams in the acute care domain to allow for development of tools and training for supporting  
46  
47 110 its managers.  
48  
49

50 111 This study aims to explore how system resilience is sustained by naturally occurring coordination  
51  
52 112 performed in situ by a management team (i.e. clinical coordinators, head nurses, senior medical doctors)  
53  
54 113 under variable circumstances.  
55  
56  
57  
58  
59  
60

## 114 METHODS

### 115 Design and setting

116 This explorative ethnographic study used participatory observations and an abductive approach to  
117 capture and analyse naturally occurring coordination in situ (23). The observations were conducted in a  
118 Swedish tertiary level NICU with an approximate capacity of 70 cots divided over three wards located in  
119 separate hospitals. The patient mix of the three wards is dependent on local factors such as the size and  
120 risk profile of adjacent delivery wards and the availability of paediatric surgical capacity. Staffing for the  
121 high acuity patients is normally one nursing team per two patients (one nurse and one assistant nurse).  
122 Paediatricians and neonatologists are allocated over the three wards depending on availability and  
123 competence.

124 ECW in each of the three wards is managed by a clinical coordinator, a head nurse and an operations  
125 manager during daytime (Figure 1). The clinical coordinator performs tasks such as rostering, planning  
126 for patient flows (admissions, discharges and transports) and clinical work when needed. The head  
127 nurse is formally responsible for the work environment and quality of care. The operations manager is a  
128 senior neonatologist with an overall responsibility for the medical quality and patient flow. A strategic  
129 operations manager has mandate to move patients between hospitals within the own organisation or to  
130 hospitals outside. All managers are clinical specialists (nurses and neonatologists). Hereafter we will  
131 refer to this team as the coordinating management team (CMT).

132 [Insert figure 1 here]

### 133 Data collection

1  
2  
3 134 Data collection employed blended observational techniques including participatory observation of  
4  
5 135 'places', shadowing managers, ad-hoc interviews, collection of artefacts, field notes and memo writing  
6  
7 136 (24). Observation of 'places' was primarily conducted in areas where the coordination of work was  
8  
9  
10 137 apparent, at the open office area where the head nurses and secretaries work and at the CMTs' office at  
11  
12 138 the center of the ward. Collected artefacts included coordinators own notes on patients' statuses,  
13  
14 139 occupancy- and rostering charts. All relevant aspects of the environment were captured in field notes  
15  
16 140 during or after the observations, along with researchers' memo-writing over personal reflections and  
17  
18 141 thoughts about what was happening. The observer performed informal interviews with staff and  
19  
20 142 managers during or after the shadowing. Clarifying questions were posed to get a broader picture of the  
21  
22 143 observed situations. The reason for focusing on action-interaction was to capture a deep understanding  
23  
24 144 of the varying conditions under which decisions and coordination happened (25).  
25  
26  
27  
28

29 145 Participant observations were conducted over the course of a year between 2016 and 2017. Beginning  
30  
31 146 with a broad descriptive phase that later became focused (26). The focused observations took place  
32  
33 147 during weekdays from 7 AM to 4 PM in January and February 2017. Starting with 50 hours of initial  
34  
35 148 observations for the researcher to get familiar with the environment, staff and relevant aspects of the  
36  
37 149 work for the subsequent observations. Four clinical coordinators were shadowed in their daily work for  
38  
39 150 a total of six full shifts, meaning that the observer followed the clinical coordinator wherever he/she  
40  
41 151 went (27,28). The observer attended both scheduled and ad hoc meetings between the managers  
42  
43 152 and/or clinical staff (29), unless explicitly asked not to by any of the participants (30).  
44  
45  
46  
47

### 48 153 **Data analysis**

49  
50

51 154 All meetings and interviews were audio recorded and transcribed verbatim. Transcriptions from tape-  
52  
53 155 recorded dialogue were placed in a correct temporal order along with the field notes, so that the mix of  
54  
55 156 field notes and transcription chronologically represented the full workday. The transcripts were read  
56  
57  
58  
59  
60

1  
2  
3 157 through several times, followed by discussions in the research group about the level of detail in the data  
4  
5 158 and reflections the observer had regarding the observed work shift (31). The initial inductive analysis  
6  
7 159 went through a two-step process (columns two and three in Table 1). First, a conversation or a situation  
8  
9 160 of relevance for the study's aim (a meaning unit) was selected and the question "What is happening  
10  
11 161 here?" was directed to data. Next, the selected conversation or situation was analysed in the context of  
12  
13 162 the entire scene where it took place, with the question "Why or how is it happening here?" The  
14  
15 163 interpretation was condensed and labelled with one or several codes (Table 1). The initial inductive  
16  
17 164 analysis generated a total of 86 codes. The codes and their relations were frequently discussed in the  
18  
19 165 research team and sorted into tentative sub- and main categories. The movement back and forth  
20  
21 166 between induction and deduction was a way to discover meaningful underlying patterns that made it  
22  
23 167 possible to integrate concrete behaviour and deep contextual structures. The last iteration of analysis  
24  
25 168 was a deductive comparison of interdependencies between the categories and sub-categories in  
26  
27 169 relation to the theoretical concepts or resilience (25). Categories and subcategories were refined, and  
28  
29 170 the researchers agreed upon six subcategories and two main categories that unified them.  
30  
31  
32  
33  
34  
35  
36  
37  
38  
39  
40  
41  
42  
43  
44  
45  
46  
47  
48  
49  
50  
51  
52  
53  
54  
55  
56  
57  
58  
59  
60

171

**Table 1** Example of the analysis in two-steps: going from *raw data* to *interpretation of incident* and to *analytical interpretation in context, code* and *memo*.

| Raw data                                                                                                                                                                                                                                                                                                                                                | Interpretation of incident                                                                                                                                                                                                                                                                                                    | Analytical interpretation in context                                                                                                                                                                                                                                                                                                                    | Code                                                                       | Memo                                                                                                                                                                                                                                                                                                                                      |
|---------------------------------------------------------------------------------------------------------------------------------------------------------------------------------------------------------------------------------------------------------------------------------------------------------------------------------------------------------|-------------------------------------------------------------------------------------------------------------------------------------------------------------------------------------------------------------------------------------------------------------------------------------------------------------------------------|---------------------------------------------------------------------------------------------------------------------------------------------------------------------------------------------------------------------------------------------------------------------------------------------------------------------------------------------------------|----------------------------------------------------------------------------|-------------------------------------------------------------------------------------------------------------------------------------------------------------------------------------------------------------------------------------------------------------------------------------------------------------------------------------------|
| The observation begins in the flow room. The flow room is a small room with two workstations where the coordinator has her seat. There are several information sources hanging on the walls and post-it notes on the computers. The coordinator meets the observer in the flow room after having walked around the ward to check all the patient rooms. | In the physical environment, several different communication tools are gathered within a small area, i.e., tools used to summarize, remember, and disseminate important information. Information exchange occurs on paper notes stuck to computers, through software, and when the coordinator herself walks around the ward. | Information exchange is one part of coordination and can be performed through predefined channels and tools, but also more intuitively through physical meetings within the ward while the manager compares notes to what is experienced. The environment has been adapted for having several different information channels intersecting in one place. | Adapting environment – cluster tools for facilitating information exchange | The coordinator has gathered information about the current situation in the patient rooms by walking around and taking a look. She then looks at the system level, occupancy lists, and information from the other coordinators. If coordination means exercising control, real life information gathering is probably an important step. |
| The coordinator sits down at a computer and begins counting patients on her paper copy of the occupancy list and in TakeCare [a patient journal system]. She reports the occupancy in Belport and talks a bit about this.                                                                                                                               | Counting patients and manually entering the number into the national occupancy report is one of the first things the coordinator does in the morning.                                                                                                                                                                         | The coordinator gets an idea of the status and distributes it to the rest of the country as information. This is proactive management, as future coordination may become easier if reference can be made to Belport, or if you know that the other units in the country your information.                                                               | Information handling                                                       | Reporting your status is a way of exercising control by impacting others perception regarding the degrees of freedom at your end.                                                                                                                                                                                                         |

172 **PATIENT AND PUBLIC INVOLVMENT**

1  
2  
3 173 Patients or the public were not directly involved in the development of this research. The researcher's  
4  
5 174 involvement with clinical experts ensured that the patient perspective were in focus.  
6  
7

## 8 9 175 **RESULTS**

10  
11  
12 176 The NICU serves as its own emergency department, intensive care unit and a pre- and postoperative  
13  
14 177 ward, requiring a wide array of interrelated multi-professional teams to operate in a coordinated  
15  
16 178 fashion. The many roles of the unit are coupled with the pressures of maintaining high-quality and  
17  
18 179 individualized care, family support and safe care practices. Some situations are manageable by  
19  
20  
21 180 reorganizing teams internally while others require the cooperation of external units (see Figure 1).  
22

23  
24 181 The 'how' and 'when' of coordination is presented in Table 2 that illustrate the functional relationship  
25  
26 182 between the two main categories *adaptations for enabling safe performance* and *maneuverability* with  
27  
28 183 their respective sub-categories. The sub-categories *Supporting system cohesion* and *Extending system*  
29  
30 184 *boundaries* describe the joint work of managers and clinical staff. *Adapting the structure and roles of the*  
31  
32 185 *coordinating management team* and *Shifting between information sources for better sensemaking*  
33  
34  
35 186 describe the management teams internal work.  
36  
37

38 187 *Extracts from the field notes and conversations during the participatory observations are presented to*  
39  
40 188 *clarify the findings. More comprehensive material is attached in the appendix 1*  
41  
42  
43  
44  
45  
46  
47  
48  
49  
50  
51  
52  
53  
54  
55  
56  
57  
58  
59  
60

189

**Table 2** The main categories are on the y-axis *adaptations for enabling safe performance* and on the x-axis; *manoeuvrability*. Four sub-categories on the y-axis describe strategies (i.e. the work that managers do); and the three sub-categories on the x-axis describe a progression of the strategies in relation to a perceived level of manoeuvrability.

| <b>Manoeuvrability</b>                           |                                                                             |                                                                                                                                                                                                                                                                                                                                  |                                                                                                                                                                                                                                                                                                                                    |                                                                                                                                                                                                                                                                                                                                                                                                                                                 |
|--------------------------------------------------|-----------------------------------------------------------------------------|----------------------------------------------------------------------------------------------------------------------------------------------------------------------------------------------------------------------------------------------------------------------------------------------------------------------------------|------------------------------------------------------------------------------------------------------------------------------------------------------------------------------------------------------------------------------------------------------------------------------------------------------------------------------------|-------------------------------------------------------------------------------------------------------------------------------------------------------------------------------------------------------------------------------------------------------------------------------------------------------------------------------------------------------------------------------------------------------------------------------------------------|
| <b>Adaptations for enabling safe performance</b> |                                                                             | <b>Losing control – reorganisation</b>                                                                                                                                                                                                                                                                                           | <b>Stretching the system to work outside ordinary conditions</b>                                                                                                                                                                                                                                                                   | <b>Everyday work under ordinary conditions</b>                                                                                                                                                                                                                                                                                                                                                                                                  |
|                                                  | <b>Supporting system cohesion</b>                                           | <ul style="list-style-type: none"> <li>Delay work and evaluate the situation</li> <li>Isolate problems and focus on re-creating manoeuvrability (creating systemic degrees of freedom)</li> <li>Exploit possibilities of extraordinary individual achievements (trade-off individual resilience for systemic control)</li> </ul> | <ul style="list-style-type: none"> <li>Goalsetting towards protecting manoeuvrability (protecting systemic degrees of freedom)</li> <li>Goalsetting for promoting basic safe care practices at the clinical level through minimal staff allocation and skill mix</li> <li>Sacrificing continuity in patient assignments</li> </ul> | <ul style="list-style-type: none"> <li>Goalsetting towards family-centred care</li> <li>Goalsetting of individualised care</li> <li>Managing optimal staff allocation for maintaining professional development and education</li> <li>Controlling occupancy and redundant capacity through predefined strategies</li> <li>Monitoring state of the ward at the clinical level by regular walkarounds in the clinical work environment</li> </ul> |
|                                                  | <b>Extending system boundaries</b>                                          | <ul style="list-style-type: none"> <li>Identifying novel use of any existing external resources (i.e. use of PETS transport team and other wards)</li> <li>Shedding managerial tasks for participating in clinical emergency work (trade-off management system for clinical system)</li> </ul>                                   | <ul style="list-style-type: none"> <li>Managing occupancy trade-offs between facilities and staffing (higher occupancy in fewer rooms lowers staff requirements).</li> <li>Utilising individual managers social networks within predefined limits for proactive problem-solving</li> </ul>                                         | <ul style="list-style-type: none"> <li>System working within normal boundaries</li> </ul>                                                                                                                                                                                                                                                                                                                                                       |
|                                                  | <b>Adapting the structure and roles of the coordinating management team</b> | <ul style="list-style-type: none"> <li>Make <i>loss of control</i> explicit in the CMT.</li> <li>Moving from understanding the situation to making rapid decisions close to the clinical level</li> </ul>                                                                                                                        | <ul style="list-style-type: none"> <li>Relaying information on the patients' clinical situation to mid- and upper-level managers (information priority bottom-up)</li> </ul>                                                                                                                                                       | <ul style="list-style-type: none"> <li>Relaying high level plans to clinical level workers through regular briefings (information priority top-down)</li> <li>Participate in regular medical discussions on patients' status'</li> </ul>                                                                                                                                                                                                        |
|                                                  | <b>Shifting between information sources for better sensemaking</b>          | <ul style="list-style-type: none"> <li>Dropping computerised aides, rostering systems and staffing charts for handwritten notes and memos</li> <li>Using face-to-face communication with people in close vicinity (shedding electronic communication)</li> </ul>                                                                 | <ul style="list-style-type: none"> <li>Seeking ad-hoc meetings within the CMT for calibrating information of the situation and possible workarounds</li> <li>Verbally explaining situations to other managers</li> </ul>                                                                                                           | <ul style="list-style-type: none"> <li>Regular use of computerised systems and manual cognitive aides</li> </ul>                                                                                                                                                                                                                                                                                                                                |

190

## 191 **Manoeuvrability**

192 The CMT work with limited staffing to achieve high occupancy while supporting clinical teams in their  
 193 care of patients. They use clinical expertise to understand the overall situation and their management  
 194 expertise to find a way forward as illustrated in the following quote.

195 *“We have put those two [patients] together in 9:1 to get an emergency cot in 9:2 for the twins [9 refers  
 196 to a room divided in two sections equipped for one patient per section 9:1 and 9:2], I told the father that*

12

1  
2  
3 197 *they may have to move out. But then we'll be in the situation where they maybe... They may need... That*  
4  
5 198 *father is very new. So, I think that in that case they'll have to be two [staff] in there too (Clinical*  
6  
7 199 *coordinator). [Q1 – appendix 1]*

9  
10 200 When several managers meet, they discuss the fit of different situations across the unit and adjust their  
11  
12 201 strategies accordingly. Some priorities are accepted while others are discarded as unacceptable. This is  
13  
14 202 described in x-axis of Table 2 as a progression of the sub-categories *Everyday work under ordinary*  
15  
16 203 *conditions, Stretching the system to work outside ordinary conditions and Losing control –*  
17  
18 204 *reorganisation.*

### 21 205 ***Everyday work under ordinary conditions***

22  
23  
24 206 Coordination under ordinary conditions is largely based on preparations and routine. Even if one of the  
25  
26 207 clinical teams are under heavy stress the situation is contained. The CMT have planned meetings,  
27  
28 208 managers sweep the ward to collect up to date information on the state of things and relay high level  
29  
30 209 plans to workers.

31  
32  
33  
34 210 *The coordinator begins her shift by conducting a walkaround of the ward, saying hello to the nurses and*  
35  
36 211 *doctors as she is asking if everything is all right. After the walkaround she sits down to begin exploring*  
37  
38 212 *her staff roster and patient occupancy charts (Observers notes).*

39  
40  
41 213 Under ordinary conditions there is a minimal observable need for managers to manually adapt any  
42  
43 214 information they extract from technical systems, regarding for example occupancy, patient acuity levels  
44  
45 215 and staffing. Managers recognise weaknesses in the technical systems but can ignore them as they are  
46  
47 216 not causing problems.

### 48 217 ***Stretching the system to work outside ordinary conditions***

49  
50  
51  
52  
53  
54  
55  
56  
57  
58  
59  
60



1  
2  
3 218 Some goals are not achievable as there is a lack of manoeuvrability for action to pursue them all.

4  
5 219 However, some can be sacrificed or be put on hold.

6  
7  
8 220 The following situation is a typical example of how the CMT must re-organize and adapt to out of  
9  
10 221 ordinary conditions.

11  
12  
13 222 *The coordinator calls for an ad-hoc on-site face-to-face discussion with the strategic operations*

14  
15 223 *manager. This happens when the CMT experience that basic safe care practices at the clinical level*

16  
17 224 *consume every opportunity for maintaining overarching quality goals, the unit stop lending help to*

18  
19 225 *others and start sacrificing continuity of care for individual patients. The plan for this day is to admit one*

20  
21 226 *intermediary level patient that were born during the night and is waiting for a room at the NICU. One*

22  
23 227 *patient has been diagnosed with a multi-resistant bacterium and will need increased hygiene standards*

24  
25 228 *(Observers notes) [...] "We are plenty of people today, which is nice. But when NN [strategic operations*

26  
27 229 *manager] asked if we had a lot of capacity, I had to say no" (Clinical coordinator) [...] "...one important*

28  
29 230 *thing. This baby that needed eye surgery is now acute and will arrive soon. They will land directly in the*

30  
31 231 *operating room and the transport team will take care of the baby until it can go back home its own*

32  
33 232 *hospital (Operations manager). [Q2 – Appendix 1]*

34  
35  
36 233 The normal plan for postoperative care after acute eye-surgery is to be assigned a cot and a nursing

37  
38 234 team on the ward. The constrained situation is managed by using the transport team to temporarily care

39  
40 235 for the baby inside the NICU until the situation is stable enough for transport to another hospital. This

41  
42 236 decision has possible implications for the whole CMT. The clinical coordinator wants to know about the

43  
44 237 utilisation of staff and facilities. The head nurse about workplace safety, quality of care and economy.

45  
46 238 The operations manager has responsibility for the medical quality and strategic operations manager for

47  
48 239 the possibility of helping the other ward in trouble.  
49  
50  
51  
52  
53  
54  
55  
56  
57  
58  
59  
60

1  
2  
3 240 The ad-hoc meeting in this example illustrate that strategic goals of family centred care and optimal staff  
4  
5 241 allocation can be traded for immediate medical priorities, basic safe care practises and protection of the  
6  
7 242 wider system. Other patients on the ward can be safely tended to by their respective teams, unaware of  
8  
9 243 this emerging crisis because it is handled by the transport team.  
10  
11

### 12 244 ***Losing control - reorganisation***

13  
14  
15 245 The state of losing control is characterised by strategies for *sacrificing coordinative work tasks* and  
16  
17 246 *focusing on re-creating manoeuvrability*. Now the focus shift to protecting clinical teams from being  
18  
19 247 exposed to the rapidly shifting plans and priorities at the managerial level. Strategies for regaining  
20  
21 248 control can be to sacrifice the goal of continuity by transferring at-risk mothers to other hospitals, or to  
22  
23 249 temporarily transfer additional weight of medical care to neighbouring sub-systems or the CMT itself  
24  
25 250 (the double headed arrows in Figure 1).  
26  
27  
28

29  
30 251 When the managers start shedding managerial tasks for doing operative work at the bedside, they will  
31  
32 252 lose the ability to meet other managers and keep up to date with the ward. Management decisions in  
33  
34 253 these situations are based on a narrower understanding of the bigger picture. Technical aides are less  
35  
36 254 used (or not at all) because of their inability to present rapidly changing borderline conditions.  
37  
38

39 255 The following situation illustrates a reorganisation at the verge of losing control. The situation is that the  
40  
41 256 coordinator tries to conserve an empty cot for possible acute emergency admissions.  
42  
43

44 257 *“This is not good, its full [the ward]. We have no space when this eye baby arrives” (Clinical coordinator).*  
45  
46 258 *The clinical coordinator walks to the room where a nurse oversees the twins that were supposed to be*  
47  
48 259 *transported out the next day but are now showing symptoms of infection (Observers notes). “Do you*  
49  
50 260 *think these twins could be together in a twin cot?” (Clinical coordinator) [...] “Well, I don’t know. This one*  
51  
52 261 *is just on the margin of managing without incubator” (Nurse) [...] “The problem is that I don’t have staff*  
53  
54 262 *to open another room.” (Clinical coordinator). [Q3 – Appendix 1]*  
55  
56  
57  
58  
59  
60

1  
2  
3 263 The way to manage this situation is to concentrate available resources by putting twins together in one  
4  
5 264 cot, using one nurse to care for three babies which is more than the goal of two babies per nurse. This  
6  
7 265 manoeuvre creates an opportunity to temporarily have the capacity for five patients (including one  
8  
9  
10 266 empty emergency cot) in a room for four- and staffing for two patients. The nurse's expresses concern  
11  
12 267 for her patient but remain focused on finding a solution.  
13  
14

15 268 ***Adaptations for enabling safe performance***

16  
17  
18 269 ***Supporting system cohesion***

19  
20  
21 270 Members of the CMT primarily communicate through ad-hoc meetings where verbal information is  
22  
23 271 compared to lists of patients, patient conditions, staffing and workload indicators. All members of the  
24  
25 272 CMT work close to the clinical context and use their up to date knowledge of the current goals'  
26  
27 273 attainment for individual clinical teams and what the trade-offs are. With their experience of how things  
28  
29 274 usually are, the managers compare computer- and paper-based cognitive aids, as well as the  
30  
31 275 information provided at start-up meetings to update their understanding of the status of the ward and  
32  
33 276 where it is heading (the umbrella perspective presented below in Figure 2). The CMT is constantly  
34  
35 277 negotiating situations that need simultaneous attention, like prioritizing readiness and clinical capacity  
36  
37 278 in some parts of the ward while maintaining family centered care and staff education in others.  
38  
39  
40  
41

42 279 ***Extending system boundaries***

43  
44  
45 280 The need for extending the systems' boundaries emerge as the pressure of prioritizing decisions  
46  
47 281 increase. This allows for the CMT to make use of other units' facilities or staff, like delaying patients in  
48  
49 282 the operating theatre or letting a transport team care for the patient for some time before handing it  
50  
51 283 over to the units' regular staff. The CMT can use auxiliary staff and overlapping competencies of  
52  
53 284 different professional groups, even managers can double as clinical staff within their vocation.  
54  
55  
56  
57  
58  
59  
60

1  
2  
3 285 ***Adapting the structure and roles of the coordinating management team***  
4  
5

6 286 The CMT express a range of strategies to fluently adapt its own structure in situations where there are  
7  
8 287 not enough resources to manage within everyday routines, when there is urgency or when some of the  
9  
10 288 CMT are not available with their specific expertise and mandate. Structural adaptation means that  
11  
12  
13 289 individuals in the CMT shift from relaying plans from top-down to working and gathering information  
14  
15 290 from bottom-up.  
16  
17

18 291 ***Shifting between information sources for better sensemaking***  
19  
20

21  
22 292 Shifting information sources was observed when the CMT increased their reliance towards handwritten  
23  
24 293 notes rather than the standard computer-generated lists for staffing and patient acuity information.  
25  
26 294 Computer-generated aides work under normal conditions but does no longer serve their purposes as the  
27  
28 295 situation on the ward become more complex.  
29  
30

31  
32 296 Handwritten notes are normally used as memory aides in team discussions. The notes are mainly short  
33  
34 297 phrases or single words in the margins like “discharge planned” or “need antibiotics”. These phrases  
35  
36 298 carry specific meaning to the managers. The limitations of computer-generated lists to convey this type  
37  
38 299 of information on real world complexities are expressed by members of the CMT. The national  
39  
40 300 occupancy chart for example is only able to classify patients as high or low acuity. When there is a need  
41  
42 301 to work outside the binary world of two patient groups, the team quit using this computer-generated  
43  
44 302 aide and instead relied on their own domain knowledge, personal network and the stability of the CMT’s  
45  
46 303 understanding of the big picture (Figure 2).  
47  
48  
49

50  
51 304 [Insert figure 2 here]  
52  
53  
54  
55  
56  
57  
58  
59  
60

## 305 DISCUSSION

306 Our findings describe a link between adaptations for enabling safe performance and the available  
307 manoeuvrability. The CMT in this study exhibited a range of mindful adaptations for sustaining the units'  
308 capacity for expressing resilience like sacrificing low level goals based on up-to date information and a  
309 continuous assessment of what would be minimally intrusive for the overall performance of the system  
310 (figure 2).

### 311 Supporting coherence

312 The CMT need to balance the demands and capacity of multiple teams that operate in separate rooms  
313 tending to patients with a wide variety of problems and acuity. Teams that for practical reasons not  
314 always meet to communicate with each other. A defining characteristic of a multiteam system is the  
315 ability of component teams to modify individual goal hierarchies while sharing a common distal goal or  
316 set of goals (20). Still, the CMT and the clinical staff consequently agree on making provision of acute  
317 care to rapidly deteriorating patients a top priority, allowing us to identify it as a core mission (i.e.  
318 purpose of the system) (32). Other priorities where more likely to be put on hold and resumed later or  
319 to be permanently dropped.

320 When the care teams are unable to communicate, an important factor for maintaining coherence was  
321 the managers maintenance of an umbrella perspective i.e. what was needed in order to understand how  
322 the bigger picture of their interventions fit together (33). At this point, it is possible to say two things  
323 about coherence that has implications for the trainability of managers as adaptive teams (34). First, that  
324 coordination supports a coherent goal setting with increased team collaboration and second, that it is  
325 enhanced by team members ability to predict the behaviour of each other.

### 326 **Reorganising to support manoeuvrability**

327 Everyday work of the CMT is characterised by seamlessly and actively organising and reorganising. The  
328 observations show how the CMT make use of early investments in for example staff's expertise, deep  
329 domain knowledge and the workplace culture to maintain a unit wide focus on the core mission (11).  
330 Allowing the care teams to adapt their goal hierarchies individually exemplifies that being resilient is to  
331 be part of a process of identifying conflicting goals in a complex, intractable environment using  
332 *"numerous indicators in a proactive fashion to probe a system's adaptive capacity before system-wide*  
333 *collapse results in disaster"* (34). A realisation of studying the CMT was the shapelessness of the  
334 organisation. We could not observe a formal agenda for how and why the CMT was supposed to  
335 prioritize in terms of goal achievement below the core mission. Our study suggests that it is up to the  
336 CMT to support the system by using experience, professional ethos and domain knowledge to negotiate  
337 the way forward. Figure two illustrate one instantiation of this balancing act.

338 Important for the application of resilience in ECW is the link between adaptation and outcome  
339 (successful or unsuccessful) as described in for example the CARE model for researching resilience in  
340 healthcare (35). An adaptation is a deviation from work as planned, and it is not always clear beforehand  
341 whether the outcome of an adaptation constitutes success or failure in terms of quality and safety (a.a).  
342 Our study describe coordinating managers' adaptive responses to the conflicting demands of acute  
343 patient care on one hand and the long-term demands for quality and safety on the other (measured as  
344 for example respirator days, patient throughput and hospital acquired bloodstream infections).  
345 Assessment and subsequent learning from adaptive managerial responses to situations where the  
346 system is "stretched" or "needs reorganization" (table 2), should be about whether the actions were  
347 able to achieve the short-term goals while preserving the long-term goals of safe, high quality patient  
348 care.

### 349 **Balancing between long- and short-term goals**

350 Resilience is dependent on the use of earlier investments in potential opportunities for action described  
351 as systemic degrees of freedom (SDOF) (11). However, low-level goal-sacrifices represent a potential  
352 loss of future investments in SDOF if they are overexploited. For example, families will be less prepared  
353 to go home if they are not trained, staff might receive less time learning from experienced colleagues  
354 and formal routines might erode if they are not employed.

355 The balancing act of seemingly irreconcilable goals makes it impossible to decide in retrospect whether  
356 coordination has been good or bad for the total outcome of the system. Each decision to suspend or  
357 sacrifice a low-level goal has implications for the organisations future capacity for expressing resilience.  
358 All teams are working towards the core mission of providing acute care. But the maintenance of long-  
359 term investments is achieved by managing a diversity of low-level goal-sacrifices between many clinical  
360 teams (i.e. sacrificing patient education in one and staff education in another). For example, in Figure 2  
361 the teams 1 and 2 can achieve parent education and family centred care because the third team can be  
362 isolated and focus on acute care.

### 363 **CONCLUSIONS**

364 We are only beginning to understand teams of managers strategies for prioritising and acting on the  
365 variability of SDOF (36). Task management, for example during medical resuscitation have well  
366 established decision support based on understanding of the human body. There is also a well-  
367 established body of knowledge around non-technical skills for clinical teams' efficient teamwork during  
368 stabilisation of a critically ill patient (37). Our findings suggest that managers at the clinical level, while  
369 being central to the system's capacity for expressing resilience, do not have a similar explicit model or

1  
2  
3 370 training for how they approach their work. Furthermore, managers lack the aid of tailored decision  
4  
5 371 support systems. This could depend on well described challenges for design of such interventions (36). It  
6  
7 372 is important that healthcare policy and organisational redesign initiated by a higher system level are well  
8  
9 373 calibrated with the nature of managerial work on the clinical level before interventions can be  
10  
11  
12 374 developed.

13  
14  
15 375 Seeing that many healthcare systems are facing increasing resource constraints, resilience and  
16  
17 376 sustainability becomes increasingly important. Our recommendations for future research and policy is to  
18  
19 377 prioritise the study and operationalisation of successful coordination in a wide variety of contexts. For  
20  
21 378 example, of how managers in the clinical context continually adapt instances of optimal staff allocation  
22  
23 379 for maintaining professional development and education with promoting basic safe care practices at the  
24  
25 380 clinical level (Figure 2).

## 30 381 **ARTICLE SUMMARY**

### 33 382 **Limitations**

34  
35  
36  
37 383 This is a single centre study of a specialised unit with a specific patient clientele that cannot be cared for  
38  
39 384 by any other type of unit available. It was expected that the unit's high tempo and specialisation would  
40  
41 385 promote a particularly observable coordinative work although it might introduce the argument of  
42  
43 386 limited transferability to other areas of healthcare. Although the specific unit for study enabled us to  
44  
45 387 capture and understand the subtleties of everyday work of first line managers, further studies are  
46  
47 388 needed to investigate how much of this work that may be specific to organizations of both similar and  
48  
49 389 contrasting types.

50  
51  
52  
53 390 The first author (KH) who conducted the fieldwork is an experienced intensive care nurse. The familiarity  
54  
55 391 with the specific type work may have affected the interpretations drawn in this study. Table 1 of the



1  
2  
3 392 methodological section provide a trail of how interpretations of data were made. Trustworthiness  
4  
5 393 during data analysis was addressed by regular peer-check and in seminars with the wider research group  
6  
7 394 (38). The iterative process of data collection and analysis was intended to secure that the analysis  
8  
9 395 included more than one researcher's interpretation. Transferability were addressed by leaving an audit  
10  
11 396 trail of extracts from the raw data in the report so that readers from other fields can evaluate if the  
12  
13 397 results are transferable to their respective contexts (39).  
14  
15  
16  
17

## 18 398 LIST OF ABBREVIATIONS

19  
20  
21  
22 399 RE: Resilience Engineering; NICU: Neonatal Intensive Care Unit; CAS: Complex Adaptive System; ECW:  
23  
24 400 Everyday Clinical Work; CMT: Coordination Management Team; SDOF: Systemic Degrees of Freedom  
25  
26  
27

## 28 401 DECLARATIONS

### 29 30 31 32 402 Ethics approval

33  
34  
35 403 This study was approved by the regional ethical review board of Stockholm (2016/1832-32).  
36  
37

### 38 404 Consent for publication

39  
40  
41 405 Not applicable.  
42  
43

### 44 406 Availability of data and material

45  
46  
47 407 Given that the data is in Swedish and phrasing of the consent obtained from participants, complete raw  
48  
49 408 data are not available for sharing. Partial datasets used and/or analysed during the current study are  
50  
51 409 available from the corresponding author on reasonable request. A selection of translated quotes is  
52  
53 410 supplied in the results and methods sections and in appendix 1.  
54  
55  
56  
57  
58  
59  
60

1  
2  
3 411 **Competing interests**  
4  
5

6 412 The authors declare that they have no competing interests.  
7

8  
9 413 **Funding**  
10

11  
12 414 The authors received no specific funding for this work.  
13  
14

15  
16 415 **Author Contributions**  
17

18 416 The study was initiated by KH. The study design was developed in collaboration within the research  
19  
20 417 team. KH performed the data collection. The analysis and interpretation of data was conducted in close  
21  
22 418 collaboration between KH, ME and KPH. KH wrote the first draft of the paper. All authors were involved  
23  
24 419 in writing, critical revisions and approval of the final version.  
25  
26  
27

28 420 **Acknowledgement**  
29

30  
31 421 Thank to Professor Eric Hollnagel that contributed with theoretical expertise on the interpretation of  
32  
33 422 data; Professor Richard Cook for valuable discussions about system safety and methodology in the early  
34  
35 423 phase of the study. Thanks also to the participating Neonatal clinic.  
36  
37

38 424 **References**  
39  
40

- 41 425 1. Braithwaite J, Churrua K, Ellis LA, Long J, Clay-williams R, Damen N, et al. Complexity Science in  
42  
43 426 Healthcare – Aspirations, Approaches, Applications and Accomplishments: A White Paper.  
44  
45 427 Australian Institute of Health Innovation, Macquarie University. Sydney; 2017.  
46  
47  
48 428 2. Cilliers P. Complexity and postmodernism Understanding complex systems. Faraday Discussions.  
49  
50 429 London: Routledge; 2002. 168 p.  
51  
52  
53 430 3. Cook R, Rasmussen J. “Going solid”: A model of system dynamics and consequences for patient  
54  
55  
56  
57  
58  
59  
60

- 1  
2  
3 431 safety. *Qual Saf Heal Care*. 2005;14(2):130–4.  
4  
5  
6 432 4. Samra HA, McGrath JM, Rollins W. Patient safety in the NICU: A comprehensive review. *J Perinat*  
7  
8 433 *Neonatal Nurs*. 2011;25(2):123–32.  
9  
10  
11 434 5. Bondurant PG, Nielsen-farrell J, Armstrong L. The Journey to High Reliability in the NICU. *J*  
12  
13 435 *perinatal Nurs*. 2015;29(2):170–8.  
14  
15  
16 436 6. World Health Organization. What is Patient Safety? [Internet]. 2018 [cited 2019 May 13].  
17  
18 437 Available from: <http://www.who.int/patientsafety/about/en/index.html>  
19  
20  
21 438 7. Committee on Data Standards for Patient Safety. Patient Safety: Achieving a New Standard for  
22  
23 439 Care [Internet]. 2004. 550 p. Available from: <http://www.nap.edu/catalog/10863.html>  
24  
25  
26 440 8. Network PS. Agency for Healthcare Research and Quality [Internet]. [cited 2018 Sep 10].  
27  
28 441 Available from: <https://psnet.ahrq.gov/glossary/P>  
29  
30  
31 442 9. Wears RL, Hollnagel E, Braithwaite J. Resilient Health Care, Volume 2 : The resilience of everyday  
32  
33 443 clinical work. Farnham: Ashgate Publishing Limited; 2015. 328 p.  
34  
35  
36 444 10. Eurocontrol. From Safety-I to Safety-II: A White Paper. *Netw Manag*. 2013;1–32.  
37  
38  
39 445 11. Ekstedt M, Cook RI. The stockholm blizzard of 2012. In: Resilient Health Care, Volume 2: The  
40  
41 446 Resilience of Everyday Clinical Work. 2017. p. 59–74.  
42  
43  
44 447 12. Cook RI. Taking Things in One’s Stride: Cognitive Features of Two Resilient Performances. In:  
45  
46 448 Hollnagel E, Woods DD, Leveson N, editors. Resilience Engineering: Concepts and Precepts  
47  
48 449 [Internet]. Burlington: Ashgate; 2006. p. 205–21. Available from:  
49  
50 450 <http://qualitysafety.bmj.com/lookup/doi/10.1136/qshc.2006.018390>  
51  
52  
53  
54 451 13. Gulati R, Wohlgezogen F, Zhelyazkov P. The Two Facets of Collaboration: Cooperation and  
55  
56  
57  
58  
59  
60

- 1  
2  
3 452 Coordination in Strategic Alliances. *Acad Manag Ann* [Internet]. 2012;6(1):531–83. Available  
4  
5 453 from: <http://search.ebscohost.com/login.aspx?direct=true&db=bth&AN=77495192&site=ehost->  
6  
7 454 [live&scope=site](http://search.ebscohost.com/login.aspx?direct=true&db=bth&AN=77495192&site=ehost-live&scope=site)
- 9  
10 455 14. Cannon-Bowers J, Tannenbaum S, Salas E, Volpe C. Defining team competencies: Implications for  
11  
12 456 training requirements and strategies. In: Guzzo R, Salas E, Associates, editors. *Team effectiveness*  
13  
14 457 *and decision making in organizations*. San Francisco, CA: Jossey-Bass; 1995. p. 333–80.
- 15  
16 458 15. Bogdanovic J, Perry J, Guggenheim M, Manser T. Adaptive coordination in surgical teams: An  
17  
18 459 interview study. *BMC Health Serv Res*. 2015;15(1):1–12.
- 19  
20 460 16. Burtscher MJ, Wacker J, Grote G, Manser T. Managing nonroutine events in anesthesia: The role  
21  
22 461 of adaptive coordination. *Hum Factors*. 2010;52(2):282–94.
- 23  
24 462 17. Nugus P, Forero R, McCarthy S, McDonnell G, Travaglia J, Hilman K, et al. The emergency  
25  
26 463 department “carousel”: An ethnographically-derived model of the dynamics of patient flow. *Int*  
27  
28 464 *Emerg Nurs* [Internet]. 2014;22(1):3–9. Available from:  
29  
30 465 <http://dx.doi.org/10.1016/j.ienj.2013.01.001>
- 31  
32 466 18. Douglas S, Cartmill R, Brown R, Hoonakker P, Slagle J, Schultz Van Roy K, et al. The work of adult  
33  
34 467 and pediatric intensive care unit nurses. *Nurs Res*. 2013;62(1):50–8.
- 35  
36 468 19. Cook R, Woods D. The messy details: Insights from technical work studies in healthcare. In:  
37  
38 469 *Proceedings of the human factors and ergonomics society 47th annual meeting*. 2003. p. 2002–3.
- 39  
40 470 20. Mathieu J, Marks MA. Multiteam Systems. In: Anderson N, Ones D, Sinangil HK VC, editor.  
41  
42 471 *Handbook of Industrial, Work & Organizational Psychology*. London, England: SAGE Publications;  
43  
44 472 2001. p. 289–313.
- 45  
46 473 21. Weaver S, Che X, Petersen L, Hysong S. Unpacking Care Coordination Through a Multiteam

- 1  
2  
3 474 System Lens: A Conceptual Framework and Systematic Review. *Med Care* [Internet].  
4  
5 475 2018;56(3):247–59. Available from:  
6  
7 476 <http://ovidsp.ovid.com/ovidweb.cgi?T=JS&PAGE=reference&D=ovftt&NEWS=N&AN=00005650->  
8  
9 477 201803000-00009  
10  
11  
12 478 22. Shuffler ML, Jiménez-Rodríguez M, Kramer WS. The Science of Multiteam Systems: A Review and  
13  
14 479 Future Research Agenda. *Small Gr Res*. 2015;46(6):659–99.  
15  
16  
17 480 23. Silverman D. *Interpreting Qualitative Data: Methods for Analysing Talk, Text and Interaction*. 2  
18  
19 481 nd. London, England: SAGE Publications; 2001. 325 p.  
20  
21  
22 482 24. Graneheim UH, Lindgren B, Lundman B. Methodological challenges in qualitative content  
23  
24 483 analysis : A discussion paper. *Nurse Educ Today* [Internet]. 2017;56(June):29–34. Available from:  
25  
26 484 <http://dx.doi.org/10.1016/j.nedt.2017.06.002>  
27  
28  
29 485 25. Dubois A, Gadde LE. Systematic combining: An abductive approach to case research. *J Bus Res*.  
30  
31 486 2002;55(7):553–60.  
32  
33  
34 487 26. Spradley JP. *Participant observation*. New York: Holt, Rinehart and Winston; 1980. 195 p.  
35  
36  
37 488 27. Tengblad S. *The Work of Managers: Towards a Practice Theory of Management* [Internet].  
38  
39 489 Tengblad S, editor. *The Work of Managers: Towards a Practice Theory of Management*. Oxford  
40  
41 490 University Press; 2012. 1–384 p. Available from:  
42  
43 491 <http://www.oxfordscholarship.com/view/10.1093/acprof:oso/9780199639724.001.0001/acprof->  
44  
45 492 9780199639724  
46  
47  
48 493 28. Arman R, Vie OE, Åsvoll H. Refining shadowing methods for studying managerial work. In: *The*  
49  
50 494 *Work of Managers Towards a Practice Theory of Management* [Internet]. Oxford University Press;  
51  
52 495 2012. p. 301–17. Available from:  
53  
54  
55  
56  
57  
58  
59  
60

- 1  
2  
3 496 <http://www.oxfordscholarship.com/view/10.1093/acprof:oso/9780199639724.001.0001/acprof->  
4  
5 497 [9780199639724-chapter-16](http://www.oxfordscholarship.com/view/10.1093/acprof:oso/9780199639724.001.0001/acprof-9780199639724-chapter-16)  
6  
7  
8 498 29. Roth EM, Patterson ES. Using Observational Study as a Tool for Discovery: Uncovering Cognitive  
9  
10 499 and Collaborative Demands and Adaptive strategies. In: Henry Montgomery, Raanan Lipshitz BB,  
11  
12 500 editor. *How Professionals Make Decision Volume 5*. 5th ed. 2005. p. 379–93.  
13  
14  
15 501 30. Johnson B. Ethical issues in shadowing research. *Qual Res Organ Manag An Int J* [Internet].  
16  
17 502 2014;9(1):21–40. Available from: [http://www.emeraldinsight.com/doi/10.1108/QROM-09-2012-](http://www.emeraldinsight.com/doi/10.1108/QROM-09-2012-1099)  
18  
19 503 1099  
20  
21  
22  
23 504 31. Strauss A, Corbin J. *Basics Of Qualitative Research: Techniques And Procedures For Developing*  
24  
25 505 *Grounded Theory*. 4 th ed. London: SAGE Publications; 1998. 456 p.  
26  
27  
28 506 32. Vicente KJ. *Cognitive work analysis : toward safe, productive, and healthy computer-based work*.  
29  
30 507 London, England: Lawrence Erlbaum Associates; 1999. xix, 392 p.  
31  
32  
33 508 33. Goldenhar LM, Brady PW, Sutcliffe KM, Muething SE. Huddling for high reliability and situation  
34  
35 509 awareness. *BMJ Qual Saf*. 2013;22(11):899–906.  
36  
37  
38 510 34. Gorman JC, Cooke NJ, Amazeen PG. Training adaptive teams. *Hum Factors*. 2010;52(2):295–307.  
39  
40  
41 511 35. Anderson JE, Ross AJ, Jaye P. Modelling Resilience and Researching the Gap between Work-as-  
42  
43 512 Imagined and Work-as-Done. In: J. Braithwaite, R. L. Wears RL and EH, editor. *Resilient Health*  
44  
45 513 *Care, Volume 3, Reconciling Work-as-Imagined and Work-as-Done*. Farnham: Ashgate; 2017. p.  
46  
47 514 133–41.  
48  
49  
50  
51 515 36. Praetorius G, Hollnagel E, Dahlman J. Modelling Vessel Traffic Service to understand resilience in  
52  
53 516 everyday operations. *Reliab Eng Syst Saf*. 2015;141:10–21.  
54  
55  
56  
57  
58  
59  
60

- 1  
2  
3 517 37. Manser T. Teamwork and patient safety in dynamic domains of healthcare: A review of the  
4  
5 518 literature. *Acta Anaesthesiol Scand*. 2009;53(2):143–51.  
6  
7  
8 519 38. Lincoln YS. Emerging Criteria for Quality in Qualitative and Interpretive Research. *Qual Inq*  
9  
10 520 [Internet]. 1995 Sep 29;1(3):275–89. Available from: [http://methods.sagepub.com/book/the-](http://methods.sagepub.com/book/the-qualitative-inquiry-reader/n19.xml)  
11  
12 521 [qualitative-inquiry-reader/n19.xml](http://methods.sagepub.com/book/the-qualitative-inquiry-reader/n19.xml)  
13  
14  
15 522 39. Elo S, Kääriäinen M, Kanste O, Pölkki T, Utriainen K, Kyngäs H. *Qualitative Content Analysis*. SAGE  
16  
17 523 *Open*. 2014;4(1):215824401452263.  
18  
19  
20  
21 524  
22  
23  
24  
25  
26  
27  
28  
29  
30  
31  
32  
33  
34  
35  
36  
37  
38  
39  
40  
41  
42  
43  
44  
45  
46  
47  
48  
49  
50  
51  
52  
53  
54  
55  
56  
57  
58  
59  
60

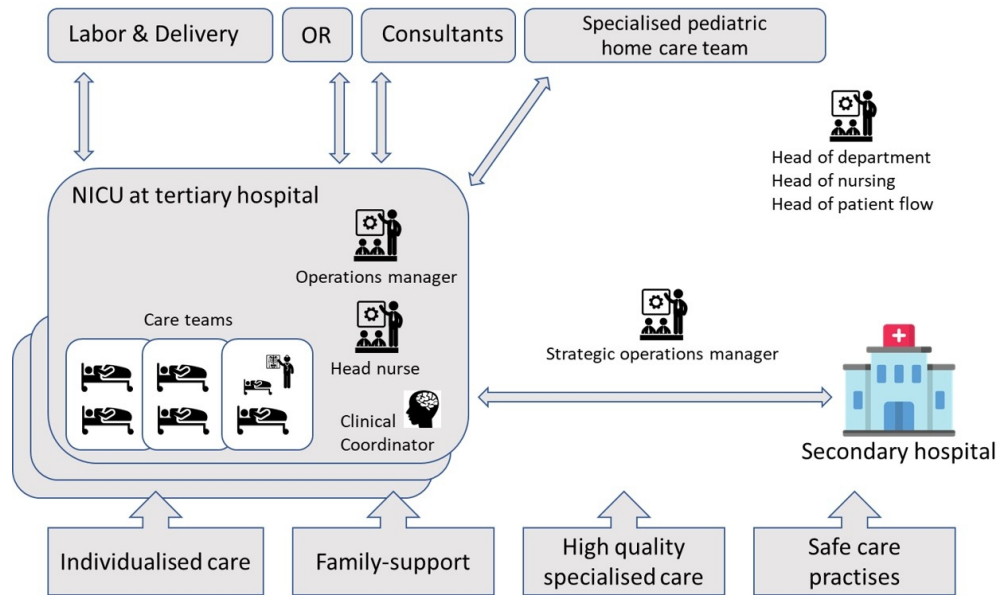

Fig. 1 The studied NICU in a tertiary level hospital with surgical capacity. Managers are located to illustrate their vicinity to the clinical care teams. Overarching goals are presented at the base of the figure. A selection of peripheral wards and units are illustrated in the surrounding area. The arrows are double headed to symbolise a two-way relationship of demands and possibilities for negotiation of for example patient transfers.

214x129mm (149 x 149 DPI)



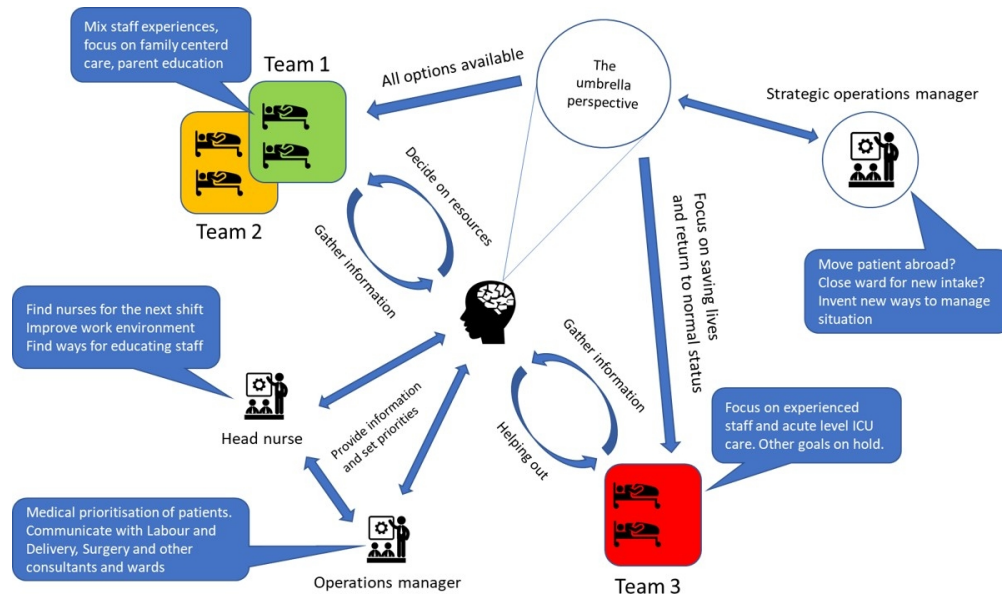

Fig. 2 The clinical coordinator at the centre of the CMT. The work of balancing goal-settings for system wide coherence, maintaining the umbrella perspective and adapting the CMTs' work to meet rapidly changing demands.

204x124mm (149 x 149 DPI)

## Appendix 1

### Q1

(Clinical coordinator) We have put those two [patients] together in 9:1 to get an emergency cot in 9:2 for the twins [9 refers to a room divided in two sections equipped for one patient per section 9:1 and 9:2], I told the father that they may have to move out. But then we'll be in the situation where they maybe... They may need... That father is very new. So, I think that in that case they'll have to be two [staff] out there too.

(Operations manager) The [NN] twins?

(Head nurse) Right. Now there are two kids there, so one person can take care of them. But if you add those two [twins] then there'll be four babies, so then you need another person out there [on the ward] and there'll only be two staff left in there [room 9].

(Operations manager) Mm, it's tricky.

(Head nurse) Oh... so there are three of them who can help each other and... in [room] 7 and 8?

(Operations manager) Okay... I understand that to mean that we have a bit of leeway here if we need it in an emergency... but nothing that we can give to anyone else. Okay. [previously wanted to lend a nurse to another ward in need]

(Head nurse) Yeah, that's too bad. We'd love to be able to.

(Operations manager) Take over week 36 twins who need it, say. And then send them back, that's no fun.

(Clinical coordinator) And then we'd have to open like [rooms] 13 and 14.

### Q2

The coordinator calls for an ad-hoc on-site face-to-face discussion with the strategic operations manager. This happens when the CMT experience that basic safe care practices at the clinical level consume every opportunity for maintaining overarching quality goals, the unit stop lending help to others and start sacrificing continuity of care for individual patients. The plan for today is to admit one intermediary level patient that were born during the night and is waiting for a room at the NICU. One patient has been diagnosed with a multi-resistant bacterium and will need increased hygiene standards. One baby currently in another hospital are being assessed by a surgeon for the need of possible transport and surgery, one will possibly arrive by helicopter for eye surgery today. Three babies are planned for being transported back to their respective local hospitals, one by helicopter today and twins tomorrow (Observers notes after the coordinating management team's morning huddle).

- (Clinical coordinator) We are plenty of people today, that is nice. But when NN [strategic operations manager] asked if we had a lot of capacity, I had to say no.

The clinical coordinator checks the antenatal list of at-risk mothers who are under observation.

- (Clinical coordinator) Oh, there is a lot here, induction, ich... a lot of bleedings. There is a lot waiting... but you don't know when... It could be calm... I will not read all their charts.
- (Operations manager) ...one important thing. This baby that needed eye surgery is now acute and will arrive soon. They will land directly in the operating room and the transport team will take care of the baby until it can go back home its own hospital.
- (Strategic operations manager) Can we lend out some staff to [a neonatal ward in a neighbouring hospital].
- (Head nurse) I can check, we have plenty of staff, but they are all in use.

- 1  
2  
3 - *(Strategic operations manager) I ask because they are not doing so well [the other unit].*  
4 *Twins are being born and they are asking for allowance and resources to move them to*  
5 *another region.*  
6

7  
8 **Q3**

- 9 - *(Clinical coordinator) This is not good, its full [the ward]. We have no space when this eye*  
10 *baby arrives.*  
11

12  
13 *The clinical coordinator walks to the room where a nurse oversees the twins that were supposed to*  
14 *be transported out the next day but are now showing symptoms of infection.*  
15

- 16 - *(Clinical coordinator) Lets' see when [Strategic operations manager] gets back, maybe we*  
17 *can send someone else.*  
18 - *(Nurse) But they went to fetch the week 31 from delivery to there [points to an empty cot].*  
19 - *(Clinical coordinator) Yes, and the eye baby is coming [points toward the 2<sup>nd</sup> empty place for*  
20 *a cot. Then its full here. Do you think these twins could be together in a twin cot?*  
21 - *(Nurse) Well, I don't know. This one is just on the margin of managing without incubator,*  
22 *and that one is getting treatment for bilirubin [treatment includes being exposed to light*  
23 *from a special lamp].*  
24 - *(Clinical coordinator) The problem is that I don't have staff to open another room.*  
25 - *(Nurse) Maybe if we reconsider the lamp-treatment...*  
26 - *(Clinical coordinator) Exactly, and then we hope that the eye baby can go back to his own*  
27 *hospital later in the evening.*  
28  
29  
30  
31  
32  
33  
34  
35  
36  
37  
38  
39  
40  
41  
42  
43  
44  
45  
46  
47  
48  
49  
50  
51  
52  
53  
54  
55  
56  
57  
58  
59  
60

# BMJ Open

## A FIRST LINE MANAGEMENT TEAM 'S STRATEGIES FOR SUSTAINING RESILIENCE IN A SPECIALISED INTENSIVE CARE UNIT – A QUALITATIVE OBSERVATIONAL STUDY

|                                 |                                                                                                                                                                                                                                                                                                                                                                                                      |
|---------------------------------|------------------------------------------------------------------------------------------------------------------------------------------------------------------------------------------------------------------------------------------------------------------------------------------------------------------------------------------------------------------------------------------------------|
| Journal:                        | <i>BMJ Open</i>                                                                                                                                                                                                                                                                                                                                                                                      |
| Manuscript ID                   | bmjopen-2020-040358.R1                                                                                                                                                                                                                                                                                                                                                                               |
| Article Type:                   | Original research                                                                                                                                                                                                                                                                                                                                                                                    |
| Date Submitted by the Author:   | 03-Sep-2020                                                                                                                                                                                                                                                                                                                                                                                          |
| Complete List of Authors:       | Hybinette, Karl; Karolinska Institutet Department of Learning Informatics Management and Ethic; Karolinska Hospital, Astrid Lindgrens Childrens Hospital<br>Pukk Härenstam, Karin; Karolinska Institutet Department of Learning Informatics Management and Ethic; Karolinska University Hospital, Paediatric Emergency Department<br>Ekstedt, Mirjam; Karolinska Institutet, LIME; Linneuniversitet, |
| <b>Primary Subject Heading</b>: | Medical management                                                                                                                                                                                                                                                                                                                                                                                   |
| Secondary Subject Heading:      | Emergency medicine, Health policy, Health services research, Health informatics, Intensive care                                                                                                                                                                                                                                                                                                      |
| Keywords:                       | QUALITATIVE RESEARCH, HEALTH SERVICES ADMINISTRATION & MANAGEMENT, Health policy < HEALTH SERVICES ADMINISTRATION & MANAGEMENT, Organisation of health services < HEALTH SERVICES ADMINISTRATION & MANAGEMENT, Risk management < HEALTH SERVICES ADMINISTRATION & MANAGEMENT                                                                                                                         |
|                                 |                                                                                                                                                                                                                                                                                                                                                                                                      |

SCHOLARONE™  
Manuscripts



I, the Submitting Author has the right to grant and does grant on behalf of all authors of the Work (as defined in the below author licence), an exclusive licence and/or a non-exclusive licence for contributions from authors who are: i) UK Crown employees; ii) where BMJ has agreed a CC-BY licence shall apply, and/or iii) in accordance with the terms applicable for US Federal Government officers or employees acting as part of their official duties; on a worldwide, perpetual, irrevocable, royalty-free basis to BMJ Publishing Group Ltd ("BMJ") its licensees and where the relevant Journal is co-owned by BMJ to the co-owners of the Journal, to publish the Work in this journal and any other BMJ products and to exploit all rights, as set out in our [licence](#).

The Submitting Author accepts and understands that any supply made under these terms is made by BMJ to the Submitting Author unless you are acting as an employee on behalf of your employer or a postgraduate student of an affiliated institution which is paying any applicable article publishing charge ("APC") for Open Access articles. Where the Submitting Author wishes to make the Work available on an Open Access basis (and intends to pay the relevant APC), the terms of reuse of such Open Access shall be governed by a Creative Commons licence – details of these licences and which [Creative Commons](#) licence will apply to this Work are set out in our licence referred to above.

Other than as permitted in any relevant BMJ Author's Self Archiving Policies, I confirm this Work has not been accepted for publication elsewhere, is not being considered for publication elsewhere and does not duplicate material already published. I confirm all authors consent to publication of this Work and authorise the granting of this licence.

1  
2  
3 1 **A FIRST LINE MANAGEMENT TEAM'S STRATEGIES FOR SUSTAINING RESILIENCE IN A**  
4 2 **SPECIALISED INTENSIVE CARE UNIT – A QUALITATIVE OBSERVATIONAL STUDY**  
5 3  
6  
7

8  
9 4 **Authors**

10 5 Karl Hybinette<sup>1,2</sup>, Karin Pukk Härenstam<sup>1-3</sup>, Mirjam Ekstedt<sup>1,4</sup>  
11  
12

13  
14 6 **Affiliation**

15  
16 7 <sup>1</sup> Department of Learning, Informatics, Management and Ethics, Karolinska Institute, Stockholm, Sweden  
17

18 8 <sup>2</sup> Theme Children & Women's Health, Karolinska University Hospital, Stockholm, Sweden  
19

20 9 <sup>3</sup> Paediatric Emergency Department, Karolinska University Hospital, Stockholm, Sweden  
21

22 10 <sup>4</sup> Department of Health and Caring Sciences, Linnaeus University, Kalmar, Sweden  
23  
24

25  
26 11 **Corresponding author**

27  
28 12 Karl Hybinette  
29

30 13 Karolinska Institute  
31

32 14 Department of Learning, Informatics, Management and Ethics,  
33

34 15 Tomtebodavägen 18 A  
35

36 16 SE 171 77 Stockholm  
37

38  
39 17 E-mail: karl.hybinette@ki.se  
40

41 18 Phone: 0046704297173  
42  
43  
44 19  
45  
46  
47 20  
48  
49  
50  
51  
52  
53  
54  
55  
56  
57  
58  
59  
60

## 21 ABSTRACT

### 22 Objectives

23 Acute care units manage high risk patients at the edge of scientifically established treatments and  
24 organisational constraints while aiming to balance reliability to standards with the needs of situational  
25 adaptation (resilience). First line managers are central in coordinating clinical care. Any systemic  
26 brittleness will be evident only in retrospect through for example care quality measures and accident  
27 statistics. This challenges us to understand what successful managerial strategies for adaptation are and  
28 how they could be improved. The managerial work of balancing reliability and adaptation is only  
29 partially understood. This study aims to explore and describe how system resilience is enhanced by  
30 naturally occurring coordination performed in situ by a management team under variable  
31 circumstances.

### 32 Design

33 An explorative observational study of a tertiary Neonatal Intensive Care Unit (NICU) in Sweden. One year  
34 of broad preparatory work followed by focused shadowing observations of coordination analysed  
35 through inductive-deductive content analysis from a perspective of resilience engineering.

### 36 Participants

37 A team of managers (i.e. clinical coordinators, head nurses, senior medical doctors).

### 38 Results

39 The results describe a functional relationship between the NICU's level of manoeuvrability and a  
40 progression of adjustments in the actual situation, expressed through recurring patterns of adaptation.  
41 Managers focused on maintaining coherence in escalating problematic situations by facilitating  
42 teamwork through goalsetting, problem-solving and circumventing the technical systems' limitations.

### 43 Conclusions

1  
2  
3 44 Coordination supports a coherent goal setting by increased team collaboration and is supported by team  
4  
5 45 members' abilities to predict the behavior of each other. Our findings suggest that in design of future  
6  
7 46 research or training for coordination, the focus of assessment and reflection on adaptive managerial  
8  
9 47 responses may lie on situations where the system was "stretched" or "needed reorganization" and that  
10  
11 48 learning should be about whether the actions were able to achieve the short-term goals while  
12  
13 49 preserving the long-term goals.

### 17 50 **Keywords**

18  
19  
20 51 Qualitative research, Health services administration & management, Health policy, Organisation of  
21  
22 52 health services, Risk management  
23  
24

### 25 53 **Wordcount**

26  
27  
28 54 4877  
29  
30

### 31 55 **Strengths and limitations of this study**

- 32  
33 56 • The explorative ethnographic design allowed for a deeper understanding of the underspecified  
34  
35 57 (hidden) work of first line managers.  
36  
37 58 • Several iterations of data collection and analysis allowed for an initially wide and later more  
38  
39 59 focused data collection that opened opportunities for the researchers to follow up on specific  
40  
41 60 findings.  
42  
43 61 • The inductive-deductive analysis allowed the researchers to follow and describe patterns of  
44  
45 62 recurring codes within the whole dataset.  
46  
47 63 • The first author (KH) who conducted the fieldwork is an experienced neonatal intensive care  
48  
49 64 nurse which may have affected the interpretations drawn in this study.  
50  
51 65 • The explorative study design was suitable for describing a complex process without measurable  
52  
53 66 clinical outcomes.  
54  
55  
56  
57  
58  
59  
60



## 67 BACKGROUND

68 The neonatal intensive care unit (NICU) is a specialized intensive care unit that serves as its own  
69 emergency department, intensive care unit and a pre- and postoperative ward, requiring a wide array of  
70 interrelated multi-professional teams to operate in a coordinated fashion. The many roles of the unit are  
71 coupled with the pressures of maintaining high-quality and individualized care, family support and safe  
72 care practices. Some situations are manageable by reorganizing teams internally while others require  
73 cooperation with external units.

74 The NICU is distributed over three hospitals in an integrated network of independent units organized  
75 under one head of department. Daily operations are overseen by the strategic operations manager to  
76 ensure collaboration for overall performance across the three units. The overarching goals as  
77 understood by the authors are individualized care, family support, high quality care and safe care  
78 practices (Figure 1).

79 [Insert figure 1 here]

80 Maintaining quality and safety is a persistent problem considering acute admissions, staff shortage and  
81 rapidly deteriorating patients with life-threatening conditions (1,2). Safety is often defined as one of  
82 many variations of 'the absence of preventable harm to a patient during the process of health care' (3).  
83 During the last decades of patient safety research a movement towards an inclusive view of supporting  
84 the healthcare systems' ability to sustain required (normal) operations has emerged, the resilience  
85 engineering (RE) perspective (4). An important point made within the RE perspective is that safety can  
86 be enhanced by a combination of structure and control on one hand and adaptations on the other (5).

1  
2  
3 87 Healthcare is to be understood as a complex sociotechnical system (6). It is not only defined by the  
4  
5 88 boundaries of physical locations (7). People with their skills and relationships, rules, regulations and  
6  
7 89 even work place culture may impact system performance (6). Research on resilience in healthcare  
8  
9 90 suggest that successful as well as unsuccessful outcomes emerge from the fluid arrangement of system  
10  
11 91 components (coordination) (8). Coordination is defined as “...*the deliberate and orderly alignment or*  
12  
13 92 *adjustment of partners’ actions to achieve jointly determined goals*” (9). ‘Partners’ in the healthcare  
14  
15 93 setting are those who share a common goal of delivering care to patients. People who perform  
16  
17 94 coordinative work are a part of a “*process by which team resources, activities, and responses are*  
18  
19 95 *organized to ensure that tasks are integrated, synchronized, and completed within established temporal*  
20  
21 96 *constraints*” (10).

22  
23  
24  
25  
26 97 Although coordination is an integral part of everyday healthcare management we know very little about  
27  
28 98 how *managers* learn the strategies they use and which of the work practices they develop that are  
29  
30 99 successful (11,12).

31  
32  
33  
34 100 This study aims to explore how system resilience is enhanced by naturally occurring coordination  
35  
36 101 performed in situ by a management team (i.e. clinical coordinators, head nurses, senior medical doctors)  
37  
38 102 under variable circumstances.

## 39 40 41 42 103 **METHODS**

### 43 44 45 46 104 **Design and setting**

47  
48  
49  
50 105 This study uses an explorative ethnographic design using participatory observations and an abductive  
51  
52 106 approach to capture and analyse naturally occurring coordination in situ (13). The reason for focusing  
53  
54 107 on action-interaction was to capture a deep understanding of the varying conditions under which

1  
2  
3 108 decisions and coordination took place (14). The Standards for Reporting Qualitative Research (SRQR)  
4  
5 109 checklist was used to improve the transparency of research (15).  
6  
7  
8  
9 110 The study took place in a tertiary level NICU with an approximate capacity of 70 cots divided over three  
10  
11 111 wards located in separate hospitals. The patient mix of the three wards is dependent on local factors  
12  
13 112 such as the size and risk profile of adjacent delivery wards and the availability of paediatric surgical  
14  
15 113 capacity. Staffing for the high acuity patients is normally one nursing team per two patients (one nurse  
16  
17 114 and one assistant nurse). Paediatricians and neonatologists are allocated over the three wards  
18  
19  
20 115 depending on availability and competence.  
21  
22  
23 116 Each of the three wards is managed by a clinical coordinator, a head nurse and an operations manager  
24  
25 117 during daytime (Figure 1). The clinical coordinator performs tasks such as rostering, planning for patient  
26  
27 118 flows (admissions, discharges and transports) and does clinical work when needed. The head nurse is  
28  
29 119 formally responsible for the work environment and quality of care. The operations manager is a senior  
30  
31 120 neonatologist with an overall responsibility for the medical quality and patient flow. A strategic  
32  
33 121 operations manager has mandate to move patients between hospitals within the own organisation or to  
34  
35 122 hospitals outside the region. All managers are clinical specialists (nurses and neonatologists). Hereafter  
36  
37 123 we will refer to this team as the management team.  
38  
39  
40  
41  
42  
43

#### 124 **Data collection**

44  
45  
46 125 Data was collected between January and February 2017. The head of the department gave permission  
47  
48 126 to conduct participant observations at the unit. All staff was informed about the procedures in a staff  
49  
50 127 meeting and they were informed that they could decline from being observed at any time according to  
51  
52 128 the ethics approval. The clinical coordinators (four individuals) gave written consent to being shadowed  
53  
54  
55  
56  
57  
58  
59  
60

1  
2  
3 129 after receiving written and oral information. The coordinators were all women, experienced nurses with  
4  
5 130 more than 10 years of NICU experience.  
6  
7

8  
9 131 Data collection was structured in iterative cycles of collection and analysis, starting with descriptive  
10  
11 132 observations to get familiar with the work environment and relevant aspects of the managers' work  
12  
13 133 (16). The descriptive observations focused primarily on 'places' where the coordination of work was  
14  
15 134 apparent, for example at the head nurses and secretaries open office area and at the management  
16  
17 135 teams' office at the center of the ward. The intermittent recording and analysis of field notes during  
18  
19 136 initial observations yielded research questions that were in focus during the following observations.  
20  
21

22  
23 137 The focused observations targeted selected situations such as rostering for the next shift, start-up  
24  
25 138 meetings and handovers between shifts in addition to shadowing of coordinators. Data was collected  
26  
27 139 through ad-hoc interviews with staff and managers during or after the shadowing (16). Shadowing  
28  
29 140 meaning "following people, wherever they are, whatever they are doing" (17). Artefacts, including  
30  
31 141 coordinators' notes on patients' medical status, occupancy- and rostering charts were copied and  
32  
33 142 collected. All relevant aspects of the environment were captured in field notes during or after the  
34  
35 143 observations, along with researcher's memo-writing over personal reflections and thoughts about what  
36  
37 144 was happening.  
38  
39  
40

## 41 42 145 **Analysis**

43  
44  
45  
46 146 All meetings and interviews were audio recorded and transcribed verbatim. Transcriptions from tape-  
47  
48 147 recorded dialogues were placed in a correct temporal order along with the field notes, so that the mix of  
49  
50 148 field notes and transcription chronologically represented the full workday. Transcripts were read  
51  
52 149 through several times, followed by discussions in the research group about the level of detail in the data  
53  
54  
55 150 and reflections KH had regarding the observed work shift (18). The initial inductive analysis went  
56  
57  
58  
59  
60

1  
2  
3 151 through a two-step process (columns two and three in Table 1). First, a conversation or a situation of  
4  
5 152 relevance for the study's aim (a meaning unit) was selected and the question "What is happening here?"  
6  
7 153 was directed to the data. Next, the selected conversation or situation was analysed in the context of the  
8  
9  
10 154 entire scene where it took place, with the question "Why or how is it happening here?". The  
11  
12 155 interpretation was condensed and labelled with one or several codes (Table 1). The codes and their  
13  
14 156 relations were frequently discussed in the research team and sorted into tentative sub- and main  
15  
16 157 categories. Field notes were included in the analysis as means to reflect on the researchers' pre-  
17  
18  
19 158 understanding of the context. Moving back and forth between induction and deduction was a way to  
20  
21 159 discover meaningful underlying patterns that made it possible to integrate concrete behaviour and deep  
22  
23 160 contextual structures. Lastly, a deductive comparison of interdependencies between the main  
24  
25 161 categories and sub-categories in relation to the theoretical concept of resilience was performed (14).  
26  
27  
28  
29  
30  
31  
32  
33  
34  
35  
36  
37  
38  
39  
40  
41  
42  
43  
44  
45  
46  
47  
48  
49  
50  
51  
52  
53  
54  
55  
56  
57  
58  
59  
60

review only

162

**Table 1** Example of the analysis in two-steps: going from *raw data* to *interpretation of incident* and to *analytical interpretation in context, code and memo*.

| Raw data                                                                                                                                                                                                                                                                                                                                                | Interpretation of incident                                                                                                                                                                                                                                                                                                    | Analytical interpretation in context                                                                                                                                                                                                                                                                                                                    | Code                                                                       | Memo                                                                                                                                                                                                                                                                                                                                      |
|---------------------------------------------------------------------------------------------------------------------------------------------------------------------------------------------------------------------------------------------------------------------------------------------------------------------------------------------------------|-------------------------------------------------------------------------------------------------------------------------------------------------------------------------------------------------------------------------------------------------------------------------------------------------------------------------------|---------------------------------------------------------------------------------------------------------------------------------------------------------------------------------------------------------------------------------------------------------------------------------------------------------------------------------------------------------|----------------------------------------------------------------------------|-------------------------------------------------------------------------------------------------------------------------------------------------------------------------------------------------------------------------------------------------------------------------------------------------------------------------------------------|
| The observation begins in the flow room. The flow room is a small room with two workstations where the coordinator has her seat. There are several information sources hanging on the walls and post-it notes on the computers. The coordinator meets the observer in the flow room after having walked around the ward to check all the patient rooms. | In the physical environment, several different communication tools are gathered within a small area, i.e., tools used to summarize, remember, and disseminate important information. Information exchange occurs on paper notes stuck to computers, through software, and when the coordinator herself walks around the ward. | Information exchange is one part of coordination and can be performed through predefined channels and tools, but also more intuitively through physical meetings within the ward while the manager compares notes to what is experienced. The environment has been adapted for having several different information channels intersecting in one place. | Adapting environment – cluster tools for facilitating information exchange | The coordinator has gathered information about the current situation in the patient rooms by walking around and taking a look. She then looks at the system level, occupancy lists, and information from the other coordinators. If coordination means exercising control, real life information gathering is probably an important step. |
| The coordinator sits down at a computer and begins counting patients on her paper copy of the occupancy list and in TakeCare [electronic health record]. She reports the occupancy in Belport [national occupancy chart] and talks a bit about this.                                                                                                    | Counting patients and manually entering the number into the national occupancy report is one of the first things the coordinator does in the morning.                                                                                                                                                                         | The coordinator gets an idea of the status and distributes it to the rest of the country as information. This is proactive management, as future coordination may become easier if reference can be made to Belport, or if you know that the other units in the country your information.                                                               | Information handling                                                       | Reporting your status is a way of exercising control by impacting others perception regarding the degrees of freedom at your end.                                                                                                                                                                                                         |

## 163 PATIENT AND PUBLIC INVOLVMENT

164 Public and patient involvement was not applicable in this research.

1  
2  
3 165 **RESULTS**  
4  
5  
6

7 166 The analysis resulted in six subcategories and two unifying main categories (table 2).  
8  
9

10 167 The 'how' and 'when' of coordination is presented in Table 2 that illustrate the functional relationship  
11  
12 168 between the two main categories *adjustments to meet the actual situation* and *maneuverability* with  
13  
14 169 their respective sub-categories. The sub-categories *Supporting system cohesion* and *Extending system*  
15  
16 170 *boundaries* describe the joint work of managers and clinical staff. *Adapting the structure and roles of the*  
17  
18 171 *coordinating management team* and *Shifting between information sources for better sensemaking*  
19  
20 172 describe the management team's internal work.  
21  
22  
23

24 173 Extracts from the field notes and conversations are presented to clarify the findings. More  
25  
26 174 comprehensive material is provided in Appendix 1.  
27  
28  
29  
30  
31  
32  
33  
34  
35  
36  
37  
38  
39  
40  
41  
42  
43  
44  
45  
46  
47  
48  
49  
50  
51  
52  
53  
54  
55  
56  
57  
58  
59  
60





1  
2  
3 178 Managers face situations where they must balance a limited number of staff and demands for high  
4  
5 179 occupancy with the task of supporting clinical teams in their care of patients. Unpredictable factors such  
6  
7 180 as acute admissions, staff availability and the medical progression of patients put managers in situations  
8  
9  
10 181 where they might quickly have to re-adjust and re-plan, often ad-hoc with scarce information of the  
11  
12 182 overall situation. Part of the observed dialogue relate to the management team's efforts to identify  
13  
14 183 alternative ways forward. See quotes at the head of Table 2. Further examples of the choices made  
15  
16 184 under each sub-category of manoeuvrability is presented in table 3.

17  
18  
19 185 In the quote below, the head nurse acknowledges that the inflow of emergency patients is sometimes  
20  
21 186 impossible to avoid.

22  
23  
24 187 *"The patient flow, do you participate in that?" (Observer). "No, no more than that I can say 'stop',*  
25  
26 188 *because I don't have the staffing." (Head nurse). "Ok, so you can say that too?" (Observer). "Mm, I can*  
27  
28 189 *say that I have five or six teams. But..." (Head nurse). "But you cannot say stop today." (Coordinator).*  
29  
30 190 *"No, but it is like that. Even if we say stop the babies are being born. And we have to take care of them."*  
31  
32 191 *(Head nurse).*

33  
34  
35  
36  
37 **Table 3** Examples of 'situations' and 'choices made' sorted under each sub-category of manoeuvrability.

| Losing control – reorganisation                                                                                                                                                                                                                                                                                                                                                                                                                                                                                                                                                                                                                                                                                                                                                                                    | Stretching the system to work outside ordinary conditions                                                                                                                                                                                                                                                                                                                                                                                                                                                                                                                                                                                             | Everyday work under ordinary conditions                                                                                                                                                                                                                                                                                                                                                                                                     |
|--------------------------------------------------------------------------------------------------------------------------------------------------------------------------------------------------------------------------------------------------------------------------------------------------------------------------------------------------------------------------------------------------------------------------------------------------------------------------------------------------------------------------------------------------------------------------------------------------------------------------------------------------------------------------------------------------------------------------------------------------------------------------------------------------------------------|-------------------------------------------------------------------------------------------------------------------------------------------------------------------------------------------------------------------------------------------------------------------------------------------------------------------------------------------------------------------------------------------------------------------------------------------------------------------------------------------------------------------------------------------------------------------------------------------------------------------------------------------------------|---------------------------------------------------------------------------------------------------------------------------------------------------------------------------------------------------------------------------------------------------------------------------------------------------------------------------------------------------------------------------------------------------------------------------------------------|
| <p><b>Situation with several problematic trade-offs.</b><br/>The coordinator approaches the head nurse when she cannot find a suitable cot for a new patient (Field-notes).<br/>"We have another problem." (Coordinator).<br/>"Right, what?" (Head nurse). "This new week 28 [patient], I cannot put in room 10 [a room with four cots, one is available], the other baby in there is terminal and about to die." (Coordinator). "But if we place him in room 16 or 15?" (Head nurse). "No, I can't put it in 15 because I have two cots in there for the twins and they must be together [also incoming patients]." (Coordinator).<br/>[...] "We cannot have the twins remaining at the stabilisation unit at delivery, there might be another patient coming in." (Coordinator). "Okay, because I thought it</p> | <p><b>Exploring options to avoid patient transfers because of staff shortage.</b><br/>"NN [strategic operations manager] think that we can conserve personnel by moving 'K' [a patient] to 'Ts' room [another patients]." (Head nurse). "Okay." (Observer). "But I am not so sure we conserve personnel by that; and the family have already moved several times, you know that they are the ones that was supposed to be moved to [another hospital]." (Coordinator). "Okay" (Observer). "It [the patient] started to have breathing problems and came back. And now after moving back here they will have to move again 'sigh'." (Coordinator).</p> | <p><b>The deliberate adaptation of an administrative routine.</b><br/>"I have talked to NN [a nurse currently placed at the emergency stabilisation unit in the delivery ward] because there is a week 35 baby there that the doctor did not want to take it up to the ward during the nightshift." (Coordinator). "No?" (Observer). "Yes, then he has of course been there a little longer that his allowed six hours." (Coordinator).</p> |

|                                                                                                                                                                                                                                                                                                                                                     |  |  |
|-----------------------------------------------------------------------------------------------------------------------------------------------------------------------------------------------------------------------------------------------------------------------------------------------------------------------------------------------------|--|--|
| <p>would be a better idea to move the twins directly from delivery [to another hospital] if they need to move anyway at some point." (Head nurse). "Mm, but where should they move. All hospitals are full [in the county]. We would have to move them out of county." (Coordinator). "Yes, we will never be allowed to do that." (Head nurse).</p> |  |  |
|-----------------------------------------------------------------------------------------------------------------------------------------------------------------------------------------------------------------------------------------------------------------------------------------------------------------------------------------------------|--|--|

192

### 193 ***Everyday work under ordinary conditions***

194 The management team have planned meetings; they sweep the ward to collect information on the state  
195 of things and relay high level plans to workers.

196 *The coordinator begins her shift by conducting a walkaround of the ward, saying hello to the nurses and  
197 doctors as she is asking if everything is all right. After the walkaround she sits down to begin exploring  
198 her staff roster and patient occupancy charts (Field-notes).*

199 Under ordinary conditions there is a minimal observable need for managers to manually adapt  
200 information they extract from technical systems, regarding for example occupancy, patient acuity levels  
201 and staffing. Managers describe how their experience of the technical systems' limitations are learned  
202 on the job and how workarounds are taught between individuals.

203 *The coordinator makes a note of something on her occupancy chart (Field-notes). "What did you write on  
204 that chart?" (Observer). "CT 11:15 [Computer Tomography at 11:15]." (Coordinator). "And it is used for  
205 that kind of information?" (Observer). "I print one of these charts because there is more space to write  
206 on. I think... I think many... I think NN and NN [two other coordinators] use this too. And NN [another  
207 coordinator] use it because I taught her. And I use it because NN [a coordinator who quit earlier] taught  
208 me." (Coordinator). "Okay, that is nice. But is it the same information you all use it for?" (Observer).  
209 "Well, I don't know?" (Coordinator). "Not important?" (Observer). "Well, I don't think so, I use it for...  
210 those that are planned for other hospitals, delivery ward, antenatal... Oh! I forgot to write that today  
211 [makes another note on the chart] and stuff that I need to do." (Coordinator).*

1  
2  
3 212 ***Stretching the system to work outside ordinary conditions***  
4  
5

6 213 The following situation is a typical example of how the management team must re-organize and adapt  
7  
8 214 to stretched conditions. The ad-hoc meeting in the example illustrates that strategic goals of family  
9  
10 215 centred care and optimal staff allocation are traded for immediate medical priorities, basic safe care  
11  
12 216 practises and protection of the wider system. Other patients on the ward are cared for by their  
13  
14  
15 217 respective teams, avoiding exposure of this emerging crisis because it is handled by the paediatric  
16  
17 218 emergency transport team.  
18  
19

20 219 *The plan for this day is to admit one intermediary level patient that was born during the night and is*  
21  
22 220 *waiting for a cot at the NICU. One patient has been diagnosed with a multi-resistant bacterium and will*  
23  
24 221 *need increased hygiene standards (Field- notes) [...] “We are plenty of people today, which is nice. But*  
25  
26 222 *when NN [strategic operations manager] asked if we had a lot of capacity, I had to say no.” (Clinical*  
27  
28 223 *coordinator). [...] “...one important thing. This baby that needed eye surgery is now acute and will arrive*  
29  
30 224 *soon. They will land directly in the operating room and the transport team will take care of the baby until*  
31  
32 225 *it can go back home to its own hospital. (Operations manager). [Q2 – Appendix 1]*  
33  
34  
35

36 226 The plan for postoperative care after acute eye-surgery was for the patient to be assigned a cot and a  
37  
38 227 nursing team on the ward. The situation was managed by using the transport team to temporarily care  
39  
40  
41 228 for the baby inside the operating room until it was stable enough for transport to another hospital. This  
42  
43 229 decision had possible implications for the whole management team. The clinical coordinator wanted to  
44  
45 230 know about the utilisation of staff and facilities. The head nurse about workplace safety, quality of care  
46  
47  
48 231 and economy. The operations manager had responsibility for the medical quality and the strategic  
49  
50 232 operations manager for the possibility of helping one of the other wards with staffing.  
51  
52

53 233 ***Losing control – reorganisation***  
54  
55  
56  
57  
58  
59  
60

1  
2  
3 234 The category of 'losing control' was characterised by managers shedding managerial tasks for  
4  
5 235 participating in clinical emergency work, isolating problems and focusing on re-creating manoeuvrability.  
6  
7 236 The focus was to protect clinical teams from being exposed to the rapidly shifting plans and priorities at  
8  
9  
10 237 the managerial level. Strategies for regaining control can be to sacrifice the goal of continuity by  
11  
12 238 transferring at-risk mothers to other hospitals (deferral), or to temporarily transfer additional weight of  
13  
14 239 medical care to neighbouring sub-systems such as the paediatric emergency transport team or the  
15  
16 240 managers themselves.

17  
18  
19 241 The following situation illustrates a reorganisation at the verge of losing control. The coordinator tried to  
20  
21 242 reserve an empty cot for possible additional acute emergency admissions.

22  
23  
24 243 *"This is not good, its full [the ward]. We have no space when this eye baby arrives."* (Clinical  
25  
26 244 coordinator). *The clinical coordinator walks to the room where a nurse oversees the twins that were*  
27  
28 245 *supposed to be transported out the next day but are now showing symptoms of infection. (Field- notes).*  
29  
30 246 *"Do you think these twins could be together in a twin cot?"* (Clinical coordinator) [...] *"Well, I don't know.*  
31  
32 247 *This one is just on the margin of managing without incubator."* (Nurse) [...] *"The problem is that I don't*  
33  
34 248 *have staff to open another room."* (Clinical coordinator). [Q3 – Appendix 1]

35  
36  
37 249 The manager handled the situation by putting twins together in one cot, thereby utilising one nurse to  
38  
39 250 care for three babies which is more than the goal of two babies per nurse. This manoeuvre created an  
40  
41 251 opportunity to temporarily handle five patients (with one empty emergency cot) in a room with staffing  
42  
43 252 for four. The nurse expressed concern for her patient but remained focused on finding a solution.

44  
45  
46 253 When the managers started shedding managerial tasks for bedside operative work, they risked losing  
47  
48 254 the ability to meet other managers and keep up to date with the ward. Management decisions in these  
49  
50 255 situations were then based on a narrower understanding of the bigger picture. Computer aides were  
51  
52 256 less used (or not at all) because of their inability to present rapidly changing borderline conditions.  
53  
54  
55  
56  
57  
58  
59  
60

### 257 **Adjustments to meet the actual situation**

258 It was observed how the mandate for making decisions was distributed across the management team  
259 and clinical nursing teams (speech bubbles in figure 2). The clinical coordinator moved freely across the  
260 unit and made independent decisions regarding resource allocation, rostering and whether to shed her  
261 own managerial work to help the clinical teams. The clinical coordinator also provided the other  
262 managers with information when they needed to adjust their plans.

263 [Insert figure 2 here]

### 264 **Supporting system cohesion**

265 Members of the management team were observed to often communicate through ad-hoc meetings  
266 where verbal information was compared to patient rosters, patient conditions, staffing and workload  
267 indicators. They worked close to the clinical context and discussed the current goals' attainment for  
268 individual clinical teams and what the current trade-offs were. The managers compared computer- and  
269 paper-based notes, as well as information provided at start-up meetings to update themselves of the  
270 status of the ward and where the situation was heading (umbrella perspective in Figure 2).

271 *The coordinator is back in room nine to alleviate the staff for lunch. She checks in on the baby that has*  
272 *been in acute surgery for intestinal obstruction. There are lots of beeping sounds, but no one seems*  
273 *alarmed. The head nurse enters the room and seeks the coordinators attention, but initially fails as the*  
274 *coordinator is tending to a patient. Eventually the coordinator looks up (Field-notes). "Didn't they [the*  
275 *surgeons] say already this morning that this patient was up for re-operation?" (Coordinator). "After*  
276 *lunch apparently. Then what do we do with NN [another patient]?" (Head nurse).*

277 In the example above the managers discussed how two patients' trajectories were affected by the  
278 surgeons rescheduling. The management team negotiated situations that needed simultaneous

1  
2  
3 279 attention, like prioritizing readiness and clinical capacity in some parts of the ward while maintaining  
4  
5 280 family centered care and staff education in others (Illustrated as the three clinical teams in Figure 2).  
6  
7

### 8 281 ***Extending system boundaries***

9  
10  
11 282 The need for extending the system's boundaries emerged as the pressure of prioritizing decisions  
12  
13 283 increased. The management team made use of other units' facilities or staff, like delaying patients in the  
14  
15 284 operating theatre or letting a transport team care for the patient for some time before handing it over  
16  
17 285 to the regular staff. The management team utilised auxiliary staff and overlapping competencies of  
18  
19 286 different professional groups. Sometimes the managers themselves doubled as clinical staff within their  
20  
21 287 vocation.  
22  
23  
24

25  
26 288 *"It is already a little tight if it arrives [the surgery baby], right now we have low workload in room nine*  
27  
28 289 *and ten with four patients and the other goes back to [another hospital out in another region] at five [in*  
29  
30 290 *the afternoon]. We hope. But it is also, I mean, if there is an acute admission and he... I do not think NN*  
31  
32 291 *[a nurse] can have four patients by himself out there. Since the father needs quite a lot of help."*  
33  
34 292 *(Coordinator). "They are really good patients those babies" (Operations manager). "What about the*  
35  
36 293 *midwives then? [that belongs to the adjacent delivery ward]" (Coordinator). "There are four of them*  
37  
38 294 *[turns to face the operations manager]?" (Head nurse). "Yesterday someone said that you can have four*  
39  
40 295 *patients by yourself." (Operations manager). "Not by yourself" (Coordinator). "With an assistant nurse."*  
41  
42 296 *(Head nurse). "Yes with an assistant yes, that is okay but." (Coordinator). "So there are three patients*  
43  
44 297 *left?" (Head nurse). "And then we have put two in the same cot at 9:1 [bed one in room nine]." (Head*  
45  
46 298 *nurse 2). "Okay." (Head nurse).*  
47  
48  
49

### 50 51 299 ***Adapting the structure and roles of the coordinating management team***

52  
53  
54  
55  
56  
57  
58  
59  
60

1  
2  
3 300 The management team fluently adapted its own structure in situations where there were not enough  
4  
5 301 resources to manage within everyday routines, when there was urgency or when some of the  
6  
7 302 management team members were not available with their specific expertise and mandate. This  
8  
9  
10 303 structural adaptation was observed when individuals in the management team shifted from relaying  
11  
12 304 plans from top-down to working with patients and gathering information from bottom-up.

13  
14  
15 305 *“In room nine is that week 22 baby that came in yesterday. They are intubating now so they use a lot of*  
16  
17 306 *people. There were no head nurses here at seven, so I decided myself that NN [nurse] got to be alone at*  
18  
19 307 *the stabilisation room [at the delivery ward]. The doctors there have to work a little harder now.”*  
20  
21  
22 308 *(Clinical coordinator).*

### 23 24 25 309 ***Shifting between information sources for better sensemaking***

26  
27  
28 310 As the situation on the ward became more complex the management team increased their reliance-on  
29  
30 311 handwritten notes rather than the standard computer-generated lists for staffing and patient acuity  
31  
32 312 information.

33  
34  
35  
36 313 The coordinator used handwritten notes as memory aides in team discussions. The notes were mainly  
37  
38 314 short markings, phrases, or single words in the margins like “discharge planned” or “need antibiotics”.

39  
40 315 The limitations of computer-generated patient rosters to convey this type of information on real world  
41  
42 316 complexities were expressed by members of the management team.

43  
44  
45  
46 317 The national occupancy chart for example was only able to classify patients as high or low acuity without  
47  
48 318 regards of other factors. When there was a need to work outside the binary world of two patient  
49  
50 319 groups, the team stopped using this computer-generated aide and instead relied on their own domain  
51  
52 320 knowledge, personal network and the stability of the management teams’ understanding of the bigger  
53  
54 321 picture.

1  
2  
3 322 “Well and this is actually look correct [number of beds in the national occupancy chart] 14 in total. But  
4  
5 323 with the stabilisation beds. That makes it 12 here plus two there... But it is also a little [inaccurate].  
6  
7 324 Because then you calculate [all of them as intensive care beds]. The stabilisation beds are supposed to be  
8  
9 325 low acuity”. (Clinical coordinator)

10  
11  
12  
13 326 The following quote illustrates what happens when the computerised information indicated normal  
14  
15 327 occupancy when the off-going night nurse reported understaffing for the same shift.

16  
17  
18 328 “How did this happen?” (Clinical coordinator).

19  
20  
21  
22 329 “Well, because NN [one of the nurses] who is work-training after sick leave was included in the staffing.

23  
24 330 The parenthesis was probably put there later [points at the handwritten parenthesis in the rostering

25  
26 331 folder, indicating that NN should not be included in the staffing]”. (Night nurse)

## 27 28 29 30 332 **DISCUSSION**

31  
32  
33  
34 333 The management team in this study exhibited a range of mindful adaptations for sustaining the units’  
35  
36 334 capacity for expressing resilience. Such as sacrificing low level goals based on up-to date information  
37  
38 335 and continuous assessments of what would be minimally intrusive for the overall performance of the  
39  
40 336 system (figure 2). Our findings elucidate a link between adjustments to meet the actual situation and the  
41  
42 337 available manoeuvrability of the system.

### 43 44 45 46 338 **Supporting coherence**

47  
48  
49  
50 339 The management team aimed to balance the demands and capacity of multiple teams that operate in  
51  
52 340 separate rooms while tending to patients with a wide variety of problems and acuity. For practical  
53  
54 341 reasons the teams could not always meet to communicate with each other. A defining characteristic of a



1  
2  
3 342 multiteam system is the ability of component teams to modify individual goal hierarchies while sharing a  
4  
5 343 common distal goal or set of goals (12). During the observations the management team and the clinical  
6  
7 344 staff consequently agreed on making provision of acute care to rapidly deteriorating patients a top  
8  
9  
10 345 priority, allowing us to identify it as a core mission (i.e. purpose of the system) (19). Other priorities  
11  
12 346 were more likely to be put on hold and resumed later or to be permanently dropped.

13  
14  
15 347 When the care teams were unable to communicate, maintaining coherence was an important factor for  
16  
17 348 the managers' maintenance of an umbrella perspective i.e. what they needed in order to understand  
18  
19 349 how the bigger picture of their interventions fit together (20). At this point, we can say two things about  
20  
21 350 coherence, with implications for the training of managers as adaptive teams (21). First, that  
22  
23 351 coordination supported a coherent goal setting with increased team collaboration and second, that it  
24  
25 352 was enhanced by team members' ability to predict the most likely priorities of each other.

### 30 353 **Reorganising to support manoeuvrability**

31  
32  
33 354 Everyday work of the management team was characterised by seamlessly and actively organising and  
34  
35 355 reorganising. Our observations illustrate how the management team made use of early investments in  
36  
37 356 for example staff's expertise, deep domain knowledge and the workplace culture to maintain a unit  
38  
39 357 wide focus on the core mission (22). Allowing the care teams to adapt their goals individually  
40  
41 358 exemplifies that being resilient is to be part of a process of identifying conflicting goals in a complex,  
42  
43 359 intractable environment using "*numerous indicators in a proactive fashion to probe a system's adaptive*  
44  
45 360 *capacity before system-wide collapse results in disaster*" (21). A realisation from studying the  
46  
47 361 management team was the shapelessness of the organisation. We could not observe a formal agenda  
48  
49 362 for how and why the management team was supposed to prioritize in terms of goal achievement below  
50  
51 363 the core mission. Our study suggests that it is up to the management team to support the system by  
52  
53 364 using experience, professional ethos and domain knowledge to negotiate the way forward in a manner  
54  
55  
56  
57  
58  
59  
60

1  
2  
3 365 that resembles the fifth principle of managing the unexpected, as described by Weick and Sutcliffe (23).  
4  
5 366 Specifically, because the flexible decision structures enabled resilient performance when expertise and  
6  
7 367 experience outranked formal hierarchical positions.  
8  
9

10  
11 368 Important for the application of resilience in everyday clinical work was the link between adaptation and  
12  
13 369 outcome (successful or unsuccessful) as described in for example the CARE model for researching  
14  
15 370 resilience in healthcare (24). An adaptation is a deviation from work as planned, and it is not always  
16  
17 371 clear beforehand whether the outcome of an adaptation constitutes success or failure in terms of  
18  
19 372 quality and safety. Our study describes managers' adaptive responses to the conflicting demands of  
20  
21 373 acute patient care on one hand and long-term strategic demands on the other (measured as for  
22  
23 374 example respirator days, patient throughput and hospital acquired bloodstream infections).  
24  
25  
26

### 27 28 375 **Balancing between long- and short-term goals**

29  
30  
31 376 Resilience depended on the use of earlier investments in 'potential opportunities for action' previously  
32  
33 377 described as degrees of freedom. However, low-level goal-sacrifices do represent a loss of potential  
34  
35 378 future degrees of freedom if it is overexploited. In the context of the NICU, families are less prepared for  
36  
37 379 discharge if they are not trained, staff might receive less time learning from experienced colleagues if  
38  
39 380 they do not work together and formal routines might erode if they are not employed.  
40  
41  
42

43  
44 381 The balancing act between seemingly irreconcilable goals makes it impossible to decide in retrospect  
45  
46 382 whether coordination was good or bad for the total outcome of the system. Each decision to suspend or  
47  
48 383 sacrifice a low-level goal has implications for the organisation's future capacity for expressing resilience.  
49  
50 384 All teams worked towards the core mission of providing acute care. However, the maintenance of long-  
51  
52 385 term investments was achieved by managing a diversity of low-level goal-sacrifices between many  
53  
54 386 clinical teams (i.e. sacrificing patient education in one and staff education in another). Our findings  
55  
56  
57  
58  
59  
60

1  
2  
3 387 suggest that in design of future research or training for coordination, the focus of assessment and  
4  
5 388 reflection should be on adaptive managerial responses in situations where the system is 'stretched' or  
6  
7 389 'in need of reorganization' (table 2). Furthermore, learning should be about whether the actions lead to  
8  
9 390 achievement of short-term goals while preserving the long-term goals.  
10  
11  
12

### 13 391 **Limitations**

14  
15  
16 392 This was a single centre study of a specialised unit with a specific patient clientele that cannot be cared  
17  
18 393 for by any other type of unit available. It was expected that the unit's high tempo and specialisation  
19  
20 394 would promote a particularly observable coordinative work with the risk that it might introduce the  
21  
22 395 argument of limited transferability to other areas of healthcare. We believe however that the  
23  
24 396 networked structure of three wards is not unique. The specific unit for study enabled us to capture and  
25  
26 397 understand the subtleties of everyday work of first line managers. Further studies are needed to  
27  
28 398 investigate how much of this work may be specific to organizations of both similar and contrasting  
29  
30 399 types.  
31  
32  
33  
34  
35

36 400 Using a qualitative cross-sectional design, this study does not allow us to define successful or  
37  
38 401 unsuccessful outcomes. Resilience is described based on the actions taken and further studies are  
39  
40 402 required to operationalise and test our results.  
41  
42  
43

44 403 The first author (KH) who conducted the fieldwork is an experienced neonatal intensive care nurse with  
45  
46 404 experience from the studied NICU. The familiarity with the specific type of work may have affected the  
47  
48 405 interpretations drawn in this study.  
49  
50

51 406 Trustworthiness during data analysis was addressed by regular peer-check and in seminars with the  
52  
53 407 wider research group and member check. The final analysis was individually validated with the  
54  
55 408 coordinators (25). The iterative process of data collection and analysis was intended to ensure that the  
56  
57  
58  
59  
60

1  
2  
3 409 analysis included more than one researcher's interpretation. Transferability was addressed by leaving an  
4  
5 410 audit trail of extracts from the data in the report so that readers from other fields can evaluate if the  
6  
7 411 results are transferable to their respective contexts (26). Table 1 of the methodological section provides  
8  
9  
10 412 a trail of how interpretations of data were made.

11  
12  
13 413 The use of voice recordings of meetings and conversations was limited to situations where verbal  
14  
15 414 consent could be obtained from all participants, unless explicitly asked not to by any of the participants  
16  
17 415 (27). In larger groups, where participants attended only partially this was not a feasible option and  
18  
19  
20 416 handwritten notes were taken, video recordings were not possible because of difficulties with assuring  
21  
22 417 patient anonymity in the clinical context.

## 23 24 25 26 418 **CONCLUSIONS**

27  
28  
29  
30 419 We are only beginning to understand managers' strategies for prioritising and acting on the variability of  
31  
32 420 degrees of freedom. Our findings suggest that managers at the clinical level, while being central to the  
33  
34 421 system's capacity for expressing resilience, do not have an explicit model or training for how they  
35  
36 422 approach their work. Furthermore, managers lack the aid of tailored decision support systems. This  
37  
38 423 could depend on well described challenges for design of such interventions (28). It is important that  
39  
40 424 healthcare policy and organisational redesign initiated at higher levels are well calibrated with the  
41  
42 425 nature of managerial work on the clinical level before interventions can be developed. Our  
43  
44 426 recommendations for future research and policy making is to prioritise definition and operationalisation  
45  
46 427 of successful coordination in a wide variety of contexts.  
47  
48  
49  
50  
51  
52  
53  
54  
55  
56  
57  
58  
59  
60

1  
2  
3  
4 428 **LIST OF ABBREVIATIONS**

5  
6  
7  
8 429 RE: Resilience Engineering;

9  
10 430 NICU: Neonatal Intensive Care Unit

11  
12  
13  
14 431 **DECLARATIONS**

15  
16  
17  
18 432 **Ethics approval**

19  
20  
21 433 This study was approved by the regional ethical review board of Stockholm (2016/1832-32).

22  
23  
24 434 **Consent for publication**

25  
26  
27 435 Not applicable.

28  
29  
30 436 **Availability of data and material**

31  
32  
33 437 Given that the data is in Swedish and the phrasing of the consent obtained from participants, complete  
34  
35 438 raw data are not available for public sharing. Partial datasets used and/or analysed during the current  
36  
37 439 study are available from the corresponding author on reasonable request. A selection of translated  
38  
39 440 quotes is supplied in the results and methods sections and in appendix 1.

40  
41  
42 441 **Competing interests**

43  
44  
45 442 The authors declare that they have no competing interests.

46  
47  
48 443 **Funding**

49  
50  
51 444 The authors received no specific funding for this work.

52  
53  
54  
55 445 **Author Contributions**

1  
2  
3 446 The study was initiated by KH. The study design was developed in collaboration within the research  
4  
5 447 team. KH performed the data collection. The analysis and interpretation of data was conducted in close  
6  
7 448 collaboration between KH, ME and KPH. KH wrote the first draft of the paper. All authors contributed  
8  
9 449 with writing, critical revisions and approval of the final version.  
10  
11

## 12 450 **Acknowledgement**

13  
14  
15 451 Thank to Professor Eric Hollnagel that contributed with theoretical expertise on the interpretation of  
16  
17 452 data; Professor Richard Cook for valuable discussions about system safety and methodology in the early  
18  
19 453 phase of the study. Thanks also to the participating Neonatal unit.  
20  
21  
22

## 23 454 **References**

- 24  
25  
26 455 1. Samra HA, McGrath JM, Rollins W. Patient safety in the NICU: A comprehensive review. *J Perinat*  
27  
28 456 *Neonatal Nurs.* 2011;25(2):123–32.  
29  
30  
31 457 2. Bondurant PG, Nielsen-farrell J, Armstrong L. The Journey to High Reliability in the NICU. *J*  
32  
33 458 *perinatal Nurs.* 2015;29(2):170–8.  
34  
35  
36 459 3. Kim L, Lyder CH, Mcneese-Smith D, Leach LS, Needleman J. Defining attributes of patient safety  
37  
38 460 through a concept analysis. *J Adv Nurs.* 2015;71(11):2490–503.  
39  
40  
41 461 4. Wears RL, Hollnagel E, Braithwaite J. *Resilient Health Care, Volume 2 : The resilience of everyday*  
42  
43 462 *clinical work.* Farnham: Ashgate Publishing Limited; 2015. 328 p.  
44  
45  
46 463 5. Eurocontrol. *From Safety-I to Safety-II: A White Paper.* *Netw Manag.* 2013;1–32.  
47  
48  
49 464 6. Braithwaite J, Churruca K, Ellis LA, Long J, Clay-williams R, Damen N, et al. *Complexity Science in*  
50  
51 465 *Healthcare – Aspirations, Approaches, Applications and Accomplishments: A White Paper.*  
52  
53 466 *Australian Institute of Health Innovation, Macquarie University. Sydney; 2017.*  
54  
55  
56  
57  
58  
59  
60

- 1  
2  
3 467 7. Cilliers P. Boundaries, Hierarchies and Networks in Complex Systems. *Int J Innov Manag*  
4  
5 468 [Internet]. 2001;05(02):135–47. Available from:  
6  
7 469 <http://www.worldscientific.com/doi/abs/10.1142/S1363919601000312>  
8  
9  
10 470 8. Cook RI. Taking Things in One’s Stride: Cognitive Features of Two Resilient Performances. In:  
11  
12 471 Hollnagel E, Woods DD, Leveson N, editors. *Resilience Engineering: Concepts and Precepts*  
13  
14 472 [Internet]. Burlington: Ashgate; 2006. p. 205–21. Available from:  
15  
16 473 <http://qualitysafety.bmj.com/lookup/doi/10.1136/qshc.2006.018390>  
17  
18  
19  
20 474 9. Gulati R, Wohlgezogen F, Zhelyazkov P. The Two Facets of Collaboration: Cooperation and  
21  
22 475 Coordination in Strategic Alliances. *Acad Manag Ann* [Internet]. 2012;6(1):531–83. Available  
23  
24 476 from: [http://search.ebscohost.com/login.aspx?direct=true&db=bth&AN=77495192&site=ehost-](http://search.ebscohost.com/login.aspx?direct=true&db=bth&AN=77495192&site=ehost-live&scope=site)  
25  
26 477 [live&scope=site](http://search.ebscohost.com/login.aspx?direct=true&db=bth&AN=77495192&site=ehost-live&scope=site)  
27  
28  
29  
30 478 10. Cannon-Bowers J, Tannenbaum S, Salas E, Volpe C. Defining team competencies: Implications for  
31  
32 479 training requirements and strategies. In: Guzzo R, Salas E, Associates, editors. *Team effectiveness*  
33  
34 480 *and decision making in organizations*. San Francisco, CA: Jossey-Bass; 1995. p. 333–80.  
35  
36  
37 481 11. Cook R, Woods D. The messy details: Insights from technical work studies in healthcare. In:  
38  
39 482 *Proceedings of the human factors and ergonomics society 47th annual meeting*. 2003. p. 2002–3.  
40  
41  
42 483 12. Mathieu J, Marks MA. Multiteam Systems. In: Anderson N, Ones D, Sinangil HK VC, editor.  
43  
44 484 *Handbook of Industrial, Work & Organizational Psychology*. London, England: SAGE Publications;  
45  
46 485 2001. p. 289–313.  
47  
48  
49  
50 486 13. Silverman D. *Interpreting Qualitative Data: Methods for Analysing Talk, Text and Interaction*. 2  
51  
52 487 nd. London, England: SAGE Publications; 2001. 325 p.  
53  
54  
55 488 14. Dubois A, Gadde LE. Systematic combining: An abductive approach to case research. *J Bus Res*.

- 1  
2  
3 489 2002;55(7):553–60.  
4  
5  
6 490 15. O’Brien BC, Harris IB, Beckman TJ, Reed DA, Cook DA. Standards for reporting qualitative  
7  
8 491 research: A synthesis of recommendations. *Acad Med*. 2014;89(9):1245–51.  
9  
10  
11 492 16. Spradley JP. Participant observation. New York: Holt, Rinehart and Winston; 1980. 195 p.  
12  
13  
14 493 17. Arman R, Vie OE, Åsvoll H. Refining shadowing methods for studying managerial work. In: *The*  
15  
16 494 *Work of Managers Towards a Practice Theory of Management* [Internet]. Oxford University Press;  
17  
18 495 2012. p. 301–17. Available from:  
19  
20 496 <http://www.oxfordscholarship.com/view/10.1093/acprof:oso/9780199639724.001.0001/acprof->  
21  
22 497 [9780199639724-chapter-16](http://www.oxfordscholarship.com/view/10.1093/acprof:oso/9780199639724.001.0001/acprof-9780199639724-chapter-16)  
23  
24  
25  
26 498 18. Strauss A, Corbin J. *Basics Of Qualitative Research: Techniques And Procedures For Developing*  
27  
28 499 *Grounded Theory*. 4 th ed. London: SAGE Publications; 1998. 456 p.  
29  
30  
31 500 19. Vicente KJ. *Cognitive work analysis : toward safe, productive, and healthy computer-based work*.  
32  
33 501 London, England: Lawrence Erlbaum Associates; 1999. xix, 392 p.  
34  
35  
36 502 20. Goldenhar LM, Brady PW, Sutcliffe KM, Muething SE. Huddling for high reliability and situation  
37  
38 503 awareness. *BMJ Qual Saf*. 2013;22(11):899–906.  
39  
40  
41 504 21. Gorman JC, Cooke NJ, Amazeen PG. Training adaptive teams. *Hum Factors*. 2010;52(2):295–307.  
42  
43  
44 505 22. Ekstedt M, Cook RI. The stockholm blizzard of 2012. In: *Resilient Health Care, Volume 2: The*  
45  
46 506 *Resilience of Everyday Clinical Work*. 2017. p. 59–74.  
47  
48  
49 507 23. Weick KE, Sutcliffe KM. *Managing the expected: Sustained performance in a complex world*. 3rd  
50  
51 508 ed. Wiley; 2015. 224 p.  
52  
53  
54 509 24. Anderson JE, Ross AJ, Jaye P. *Modelling Resilience and Researching the Gap between Work-as-*



- 1  
2  
3 510 Imagined and Work-as-Done. In: J. Braithwaite, R. L. Wears RL and EH, editor. Resilient Health  
4  
5 511 Care, Volume 3, Reconciling Work-as-Imagined and Work-as-Done. Farnham: Ashgate; 2017. p.  
6  
7 512 133–41.
- 9  
10 513 25. Lincoln YS. Emerging Criteria for Quality in Qualitative and Interpretive Research. Qual Inq  
11  
12 514 [Internet]. 1995 Sep 29;1(3):275–89. Available from: [http://methods.sagepub.com/book/the-](http://methods.sagepub.com/book/the-qualitative-inquiry-reader/n19.xml)  
13  
14 515 qualitative-inquiry-reader/n19.xml
- 16  
17 516 26. Elo S, Kääriäinen M, Kanste O, Pölkki T, Utriainen K, Kyngäs H. Qualitative Content Analysis. SAGE  
18  
19 517 Open. 2014;4(1):215824401452263.
- 21  
22 518 27. Johnson B. Ethical issues in shadowing research. Qual Res Organ Manag An Int J [Internet].  
23  
24 519 2014;9(1):21–40. Available from: [http://www.emeraldinsight.com/doi/10.1108/QROM-09-2012-](http://www.emeraldinsight.com/doi/10.1108/QROM-09-2012-1099)  
25  
26 520 1099
- 27  
28 521 28. Praetorius G, Hollnagel E, Dahlman J. Modelling Vessel Traffic Service to understand resilience in  
29  
30 522 everyday operations. Reliab Eng Syst Saf. 2015;141:10–21.

### 523 Figure legends

34  
35  
36 524 **Fig. 1** The studied NICU in a tertiary level hospital with surgical capacity. Managers are visually located to illustrate  
37  
38 525 their vicinity to the clinical care teams. Overarching goals are presented at the base of the figure with examples of  
39  
40 526 how they are expressed in daily work. A selection of peripheral wards and units are illustrated in the surrounding  
41  
42 527 area. The arrows are double headed to symbolise a two-way relationship of demands and possibilities for  
43  
44 528 negotiation of for example patient transfers.

45  
46  
47 529 **Fig. 2** Illustration of the work of balancing goal-settings for system wide coherence, maintaining the umbrella  
48  
49 530 perspective and streamlining communication to meet rapidly changing demands with the shadowed clinical  
50  
51 531 coordinator at the centre. The width of double headed arrows visualises an estimation of the most frequently  
52  
53 532 observed communication for the respective manager.

533

For peer review only

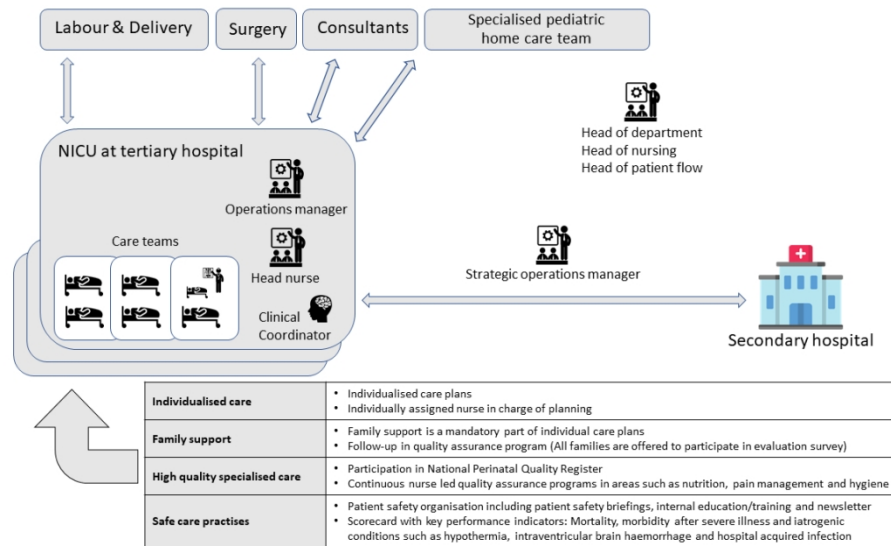

Fig. 1 The studied NICU in a tertiary level hospital with surgical capacity. Managers are visually located to illustrate their vicinity to the clinical care teams. Overarching goals are presented at the base of the figure with examples of how they are expressed in daily work. A selection of peripheral wards and units are illustrated in the surrounding area. The arrows are double headed to symbolise a two-way relationship of demands and possibilities for negotiation of for example patient transfers.

108x60mm (300 x 300 DPI)

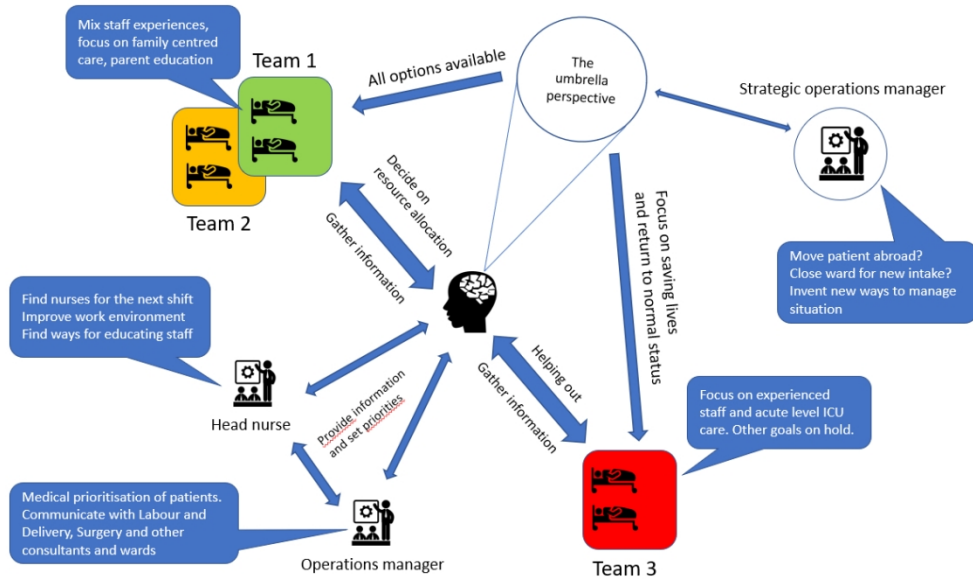

Fig. 2 Illustration of the work of balancing goal-settings for system wide coherence, maintaining the umbrella perspective and streamlining communication to meet rapidly changing demands with the shadowed clinical coordinator at the centre. The width of double headed arrows visualises an estimation of the most frequently observed communication for the respective manager.

102x61mm (300 x 300 DPI)

## Appendix 1

### Q1

(Clinical coordinator) We have put those two [patients] together in 9:1 to get an emergency cot in 9:2 for the twins [9 refers to a room divided in two sections equipped for one patient per section 9:1 and 9:2], I told the father that they may have to move out. But then we'll be in the situation where they maybe... They may need... That father is very new. So, I think that in that case they'll have to be two [staff] out there too.

(Operations manager) The [NN] twins?

(Head nurse) Right. Now there are two kids there, so one person can take care of them. But if you add those two [twins] then there'll be four babies, so then you need another person out there [on the ward] and there'll only be two staff left in there [room 9].

(Operations manager) Mm, it's tricky.

(Head nurse) Oh... so there are three of them who can help each other and... in [room] 7 and 8?

(Operations manager) Okay... I understand that to mean that we have a bit of leeway here if we need it in an emergency... but nothing that we can give to anyone else. Okay. [previously wanted to lend a nurse to another ward in need]

(Head nurse) Yeah, that's too bad. We'd love to be able to.

(Operations manager) Take over week 36 twins who need it, say. And then send them back, that's no fun.

(Clinical coordinator) And then we'd have to open like [rooms] 13 and 14.

### Q2

The coordinator calls for an ad-hoc on-site face-to-face discussion with the strategic operations manager. This happens when the CMT experience that basic safe care practices at the clinical level consume every opportunity for maintaining overarching quality goals, the unit stop lending help to others and start sacrificing continuity of care for individual patients. The plan for today is to admit one intermediary level patient that were born during the night and is waiting for a room at the NICU. One patient has been diagnosed with a multi-resistant bacterium and will need increased hygiene standards. One baby currently in another hospital are being assessed by a surgeon for the need of possible transport and surgery, one will possibly arrive by helicopter for eye surgery today. Three babies are planned for being transported back to their respective local hospitals, one by helicopter today and twins tomorrow (Observers notes after the coordinating management team's morning huddle).

- (Clinical coordinator) We are plenty of people today, that is nice. But when NN [strategic operations manager] asked if we had a lot of capacity, I had to say no.

The clinical coordinator checks the antenatal list of at-risk mothers who are under observation.

- (Clinical coordinator) Oh, there is a lot here, induction, ich... a lot of bleedings. There is a lot waiting... but you don't know when... It could be calm... I will not read all their charts.
- (Operations manager) ...one important thing. This baby that needed eye surgery is now acute and will arrive soon. They will land directly in the operating room and the transport team will take care of the baby until it can go back home its own hospital.
- (Strategic operations manager) Can we lend out some staff to [a neonatal ward in a neighbouring hospital].
- (Head nurse) I can check, we have plenty of staff, but they are all in use.

- 1  
2  
3 - (Strategic operations manager) I ask because they are not doing so well [the other unit].  
4 Twins are being born and they are asking for allowance and resources to move them to  
5 another region.  
6

7  
8 **Q3**

- 9 - (Clinical coordinator) This is not good, its full [the ward]. We have no space when this eye  
10 baby arrives.  
11

12  
13 The clinical coordinator walks to the room where a nurse oversees the twins that were supposed to  
14 be transported out the next day but are now showing symptoms of infection.  
15

- 16 - (Clinical coordinator) Lets' see when [Strategic operations manager] gets back, maybe we  
17 can send someone else.  
18 - (Nurse) But they went to fetch the week 31 from delivery to there [points to an empty cot].  
19 - (Clinical coordinator) Yes, and the eye baby is coming [points toward the 2<sup>nd</sup> empty place for  
20 a cot. Then its full here. Do you think these twins could be together in a twin cot?  
21 - (Nurse) Well, I don't know. This one is just on the margin of managing without incubator,  
22 and that one is getting treatment for bilirubin [treatment includes being exposed to light  
23 from a special lamp].  
24 - (Clinical coordinator) The problem is that I don't have staff to open another room.  
25 - (Nurse) Maybe if we reconsider the lamp-treatment..  
26 - (Clinical coordinator) Exactly, and then we hope that the eye baby can go back to his own  
27 hospital later in the evening.  
28  
29  
30  
31  
32  
33  
34  
35  
36  
37  
38  
39  
40  
41  
42  
43  
44  
45  
46  
47  
48  
49  
50  
51  
52  
53  
54  
55  
56  
57  
58  
59  
60

## Standards for Reporting Qualitative Research (SRQR)

O'Brien B.C., Harris, I.B., Beckman, T.J., Reed, D.A., & Cook, D.A. (2014). Standards for reporting qualitative research: a synthesis of recommendations. *Academic Medicine*, 89(9), 1245-1251.

| No.                       | Topic                                      | Item                                                                                                                                                                                                                                                                                                                                                                                                      |
|---------------------------|--------------------------------------------|-----------------------------------------------------------------------------------------------------------------------------------------------------------------------------------------------------------------------------------------------------------------------------------------------------------------------------------------------------------------------------------------------------------|
| <b>Title and abstract</b> |                                            |                                                                                                                                                                                                                                                                                                                                                                                                           |
| S1                        | Title                                      | <p>Concise description of the nature and topic of the study identifying the study as qualitative or indicating the approach (e.g., ethnography, grounded theory) or data collection methods (e.g., interview, focus group) is recommended</p> <p><b>Qualitative descriptive study is part of the title.</b></p>                                                                                           |
| S2                        | Abstract                                   | <p>Summary of key elements of the study using the abstract format of the intended publication; typically includes objective, methods, results, and conclusions</p> <p><b>The 300 words abstract contain objectives, design, participants, results and conclusions</b></p>                                                                                                                                 |
| <b>Introduction</b>       |                                            |                                                                                                                                                                                                                                                                                                                                                                                                           |
| S3                        | Problem formulation                        | <p>Description and significance of the problem/phenomenon studied; review of relevant theory and empirical work; problem statement</p> <p><b>Problem statement on line 84 followed by relevant theory. Study Aim is located at line 100-102.</b></p>                                                                                                                                                      |
| S4                        | Purpose or research question               | <p>Purpose of the study and specific objectives or questions</p> <p><b>The explorative qualitative design is guided by the study aim. A specific area for improvement in indicated on line 97-99</b></p>                                                                                                                                                                                                  |
| <b>Methods</b>            |                                            |                                                                                                                                                                                                                                                                                                                                                                                                           |
| S5                        | Qualitative approach and research paradigm | <p>Qualitative approach (e.g., ethnography, grounded theory, case study, phenomenology, narrative research) and guiding theory if appropriate; identifying the research paradigm (e.g., positivist, constructivist/interpretivist) is also recommended</p> <p><b>The ethnographic design and participatory observations are described in the methods section, sub headline "Design" line 105-109.</b></p> |
| S6                        | Researcher characteristics and reflexivity | <p>Researchers' characteristics that may influence the research, including personal attributes, qualifications/experience, relationship with participants, assumptions, or presuppositions; potential or actual interaction between researchers' characteristics and the research questions, approach, methods, results, or transferability</p>                                                           |

|                                                  |                                                                                                                                                                                                                                                                                                                                                                                                                                      |
|--------------------------------------------------|--------------------------------------------------------------------------------------------------------------------------------------------------------------------------------------------------------------------------------------------------------------------------------------------------------------------------------------------------------------------------------------------------------------------------------------|
|                                                  | <b>The researchers characteristics is mentioned in the methodological bulletpoint on page 3 line 63-64 and further discussed in “Limitations” line 403-405. Trustworthiness is discussed in the last paragraph in “Limitations”</b>                                                                                                                                                                                                  |
| S7 Context                                       | Setting/site and salient contextual factors; rationale <sup>a</sup><br><br><b>Setting is presented in the <i>introductions first paragraph</i> and a subheading under methods “Design and setting” Line 105-109. 110-115.</b>                                                                                                                                                                                                        |
| S8 Sampling strategy                             | How and why research participants, documents, or events were selected; criteria for deciding when no further sampling was necessary (e.g., sampling saturation); rationale <sup>a</sup><br><br><b>The sample of data are mentioned in line 131-144. Saturation is not specifically discussed.</b>                                                                                                                                    |
| S9 Ethical issues pertaining to human subjects   | Documentation of approval by an appropriate ethics review board and participant consent, or explanation for lack thereof; other confidentiality and data security issues.<br><br><b>Ethics approval information on line 433.</b>                                                                                                                                                                                                     |
| S10 Data collection methods                      | Types of data collected; details of data collection procedures including (as appropriate) start and stop dates of data collection and analysis, iterative process, triangulation of sources/methods, and modification of procedures in response to evolving study findings; rationale <sup>a</sup><br><br><b>Data collection and data sources are presented in the methods section, sub-headline “Data collection” line 131-144.</b> |
| S11 Data collection instruments and technologies | Description of instruments (e.g., interview guides, questionnaires) and devices (e.g., audio recorders) used for data collection; if/how the instrument(s) changed over the course of the study<br><br><b>Audio recording presented on line 147. Other instruments are not applicable in the ethnographic design.</b>                                                                                                                |
| S12 Units of study                               | Number and relevant characteristics of participants, documents, or events included in the study; level of participation (could be reported in results)<br><br><b>Not applicable in the ethnographic design, ample data is presented through quotes and appendix 1.</b>                                                                                                                                                               |
| S13 Data processing                              | Methods for processing data prior to and during analysis, including transcription, data entry, data management and security, verification of data integrity, data coding, and anonymization/deidentification of excerpts<br><br><b>Analysis and collection of data were iterated according to the study design.</b>                                                                                                                  |
| S14 Data analysis                                | Process by which inferences, themes, etc., were identified and developed, including researchers involved in data analysis; usually references a specific paradigm or approach; rationale <sup>a</sup><br><br><b>Analysis method presented in line 146-161 and “table 1” for further transparency.</b>                                                                                                                                |
| S15 Techniques to enhance trustworthiness        | Techniques to enhance trustworthiness and credibility of data analysis (e.g., member checking, audit trail, triangulation); rationale <sup>a</sup>                                                                                                                                                                                                                                                                                   |



|                                                                                                  |                                                                                                                                                                                                                                                                                                                                                                                                            |
|--------------------------------------------------------------------------------------------------|------------------------------------------------------------------------------------------------------------------------------------------------------------------------------------------------------------------------------------------------------------------------------------------------------------------------------------------------------------------------------------------------------------|
|                                                                                                  | <b>Trustworthiness discussed in line 406-412</b>                                                                                                                                                                                                                                                                                                                                                           |
| <b>Results/Findings</b>                                                                          |                                                                                                                                                                                                                                                                                                                                                                                                            |
| S16 Synthesis and interpretation                                                                 | Main findings (e.g., interpretations, inferences, and themes); might include development of a theory or model, or integration with prior research or theory<br><br><b>Results is based on an interpretation through a lens of the theoretical concept of resilience. Integration with theory is found in the discussion.</b>                                                                               |
| S17 Links to empirical data                                                                      | Evidence (e.g., quotes, field notes, text excerpts, photographs) to substantiate analytic findings<br><br><b>Extensive quotes and field notes presented in results and appendix 1.</b>                                                                                                                                                                                                                     |
| <b>Discussion</b>                                                                                |                                                                                                                                                                                                                                                                                                                                                                                                            |
| S18 Integration with prior work, implications, transferability, and contribution(s) to the field | Short summary of main findings; explanation of how findings and conclusions connect to, support, elaborate on, or challenge conclusions of earlier scholarship; discussion of scope of application/generalizability; identification of unique contribution(s) to scholarship in a discipline or field<br><br><b>Integration with existing management theory for example in line 341-343, 363-367, 369.</b> |
| S19 Limitations                                                                                  | Trustworthiness and limitations of findings<br><br><b>Trustworthiness and limitations are discussed in lines 392-412</b>                                                                                                                                                                                                                                                                                   |
| <b>Other</b>                                                                                     |                                                                                                                                                                                                                                                                                                                                                                                                            |
| S20 Conflicts of interest                                                                        | Potential sources of influence or perceived influence on study conduct and conclusions; how these were managed<br><br><b>No competing interests line 442</b>                                                                                                                                                                                                                                               |
| S21 Funding                                                                                      | Sources of funding and other support; role of funders in data collection, interpretation, and reporting<br><br><b>No specific funding line 444.</b>                                                                                                                                                                                                                                                        |

<sup>a</sup>The rationale should briefly discuss the justification for choosing that theory, approach, method, or technique rather than other options available, the assumptions and limitations implicit in those choices, and how those choices influence study conclusions and transferability. As appropriate, the rationale for several items might be discussed together

# BMJ Open

## A FIRST LINE MANAGEMENT TEAM 'S STRATEGIES FOR SUSTAINING RESILIENCE IN A SPECIALISED INTENSIVE CARE UNIT – A QUALITATIVE OBSERVATIONAL STUDY

|                                 |                                                                                                                                                                                                                                                                                                                                                                                                      |
|---------------------------------|------------------------------------------------------------------------------------------------------------------------------------------------------------------------------------------------------------------------------------------------------------------------------------------------------------------------------------------------------------------------------------------------------|
| Journal:                        | <i>BMJ Open</i>                                                                                                                                                                                                                                                                                                                                                                                      |
| Manuscript ID                   | bmjopen-2020-040358.R2                                                                                                                                                                                                                                                                                                                                                                               |
| Article Type:                   | Original research                                                                                                                                                                                                                                                                                                                                                                                    |
| Date Submitted by the Author:   | 07-Dec-2020                                                                                                                                                                                                                                                                                                                                                                                          |
| Complete List of Authors:       | Hybinette, Karl; Karolinska Institutet Department of Learning Informatics Management and Ethic; Karolinska Hospital, Astrid Lindgrens Childrens Hospital<br>Pukk Härenstam, Karin; Karolinska Institutet Department of Learning Informatics Management and Ethic; Karolinska University Hospital, Paediatric Emergency Department<br>Ekstedt, Mirjam; Karolinska Institutet, LIME; Linneuniversitet, |
| <b>Primary Subject Heading</b>: | Medical management                                                                                                                                                                                                                                                                                                                                                                                   |
| Secondary Subject Heading:      | Emergency medicine, Health policy, Health services research, Health informatics, Intensive care                                                                                                                                                                                                                                                                                                      |
| Keywords:                       | QUALITATIVE RESEARCH, HEALTH SERVICES ADMINISTRATION & MANAGEMENT, Health policy < HEALTH SERVICES ADMINISTRATION & MANAGEMENT, Organisation of health services < HEALTH SERVICES ADMINISTRATION & MANAGEMENT, Risk management < HEALTH SERVICES ADMINISTRATION & MANAGEMENT                                                                                                                         |
|                                 |                                                                                                                                                                                                                                                                                                                                                                                                      |

SCHOLARONE™  
Manuscripts



I, the Submitting Author has the right to grant and does grant on behalf of all authors of the Work (as defined in the below author licence), an exclusive licence and/or a non-exclusive licence for contributions from authors who are: i) UK Crown employees; ii) where BMJ has agreed a CC-BY licence shall apply, and/or iii) in accordance with the terms applicable for US Federal Government officers or employees acting as part of their official duties; on a worldwide, perpetual, irrevocable, royalty-free basis to BMJ Publishing Group Ltd ("BMJ") its licensees and where the relevant Journal is co-owned by BMJ to the co-owners of the Journal, to publish the Work in this journal and any other BMJ products and to exploit all rights, as set out in our [licence](#).

The Submitting Author accepts and understands that any supply made under these terms is made by BMJ to the Submitting Author unless you are acting as an employee on behalf of your employer or a postgraduate student of an affiliated institution which is paying any applicable article publishing charge ("APC") for Open Access articles. Where the Submitting Author wishes to make the Work available on an Open Access basis (and intends to pay the relevant APC), the terms of reuse of such Open Access shall be governed by a Creative Commons licence – details of these licences and which [Creative Commons](#) licence will apply to this Work are set out in our licence referred to above.

Other than as permitted in any relevant BMJ Author's Self Archiving Policies, I confirm this Work has not been accepted for publication elsewhere, is not being considered for publication elsewhere and does not duplicate material already published. I confirm all authors consent to publication of this Work and authorise the granting of this licence.

1  
2  
3 1 **A FIRST LINE MANAGEMENT TEAM'S STRATEGIES FOR SUSTAINING RESILIENCE IN A**  
4 2 **SPECIALISED INTENSIVE CARE UNIT – A QUALITATIVE OBSERVATIONAL STUDY**  
5 3  
6  
7

8  
9 4 **Authors**

10 5 Karl Hybinette<sup>1,2</sup>, Karin Pukk Härenstam<sup>1-3</sup>, Mirjam Ekstedt<sup>1, 4</sup>  
11  
12

13 6 **Affiliation**

14  
15  
16 7 <sup>1</sup> Department of Learning, Informatics, Management and Ethics, Karolinska Institute, Stockholm, Sweden  
17

18 8 <sup>2</sup> Theme Children & Women's Health, Karolinska University Hospital, Stockholm, Sweden  
19

20 9 <sup>3</sup> Paediatric Emergency Department, Karolinska University Hospital, Stockholm, Sweden  
21

22 10 <sup>4</sup> Department of Health and Caring Sciences, Linnaeus University, Kalmar, Sweden  
23  
24

25 11 **Corresponding author**

26 12 Karl Hybinette  
27

28 13 Karolinska Institute  
29

30 14 Department of Learning, Informatics, Management and Ethics,  
31  
32  
33

34 15 Tomtebodavägen 18 A  
35

36 16 SE 171 77 Stockholm  
37

38 17 E-mail: karl.hybinette@ki.se  
39  
40

41 18 Phone: 0046704297173  
42  
43  
44  
45  
46  
47  
48  
49  
50  
51  
52  
53  
54  
55  
56  
57  
58  
59  
60

## 21 ABSTRACT

### 22 Objectives

23 Acute care units manage high risk patients at the edge of scientifically established treatments and  
24 organisational constraints while aiming to balance reliability to standards with the needs of situational  
25 adaptation (resilience). First line managers are central in coordinating clinical care. Any systemic  
26 brittleness will be evident only in retrospect through for example care quality measures and accident  
27 statistics. This challenges us to understand what successful managerial strategies for adaptation are and  
28 how they could be improved. The managerial work of balancing reliability and adaptation is only  
29 partially understood. This study aims to explore and describe how system resilience is enhanced by  
30 naturally occurring coordination performed in situ by a management team under variable  
31 circumstances.

### 32 Design

33 An explorative observational study of a tertiary Neonatal Intensive Care Unit (NICU) in Sweden. One year  
34 of broad preparatory work followed by focused shadowing observations of coordination analysed  
35 through inductive-deductive content analysis from a perspective of resilience engineering.

### 36 Participants

37 A team of managers (i.e. clinical coordinators, head nurses, senior medical doctors).

### 38 Results

39 The results describe a functional relationship between the NICU's level of manoeuvrability and a  
40 progression of adjustments in the actual situation, expressed through recurring patterns of adaptation.  
41 Managers focused on maintaining coherence in escalating problematic situations by facilitating  
42 teamwork through goalsetting, problem-solving and circumventing the technical systems' limitations.

### 43 Conclusions

1  
2  
3 44 Coordination supports a coherent goal setting by increased team collaboration and is supported by team  
4  
5 45 members' abilities to predict the behavior of each other. Our findings suggest that in design of future  
6  
7 46 research or training for coordination, the focus of assessment and reflection on adaptive managerial  
8  
9 47 responses may lie on situations where the system was "stretched" or "needed reorganization" and that  
10  
11 48 learning should be about whether the actions were able to achieve the short-term goals while  
12  
13 49 preserving the long-term goals.

### 17 50 **Keywords**

18  
19  
20 51 Qualitative research, Health services administration & management, Health policy, Organisation of  
21  
22 52 health services, Risk management  
23  
24

### 25 53 **Wordcount**

26  
27  
28 54 4877  
29  
30

### 31 55 **Strengths and limitations of this study**

- 32  
33 56 • The explorative ethnographic design allowed for a deeper understanding of the underspecified  
34  
35 57 (hidden) work of first line managers.  
36  
37 58 • Several iterations of data collection and analysis allowed for an initially wide and later more  
38  
39 59 focused data collection that opened opportunities for the researchers to follow up on specific  
40  
41 60 findings.  
42  
43 61 • The inductive-deductive analysis allowed the researchers to follow and describe patterns of  
44  
45 62 recurring codes within the whole dataset.  
46  
47 63 • The first author (KH) who conducted the fieldwork is an experienced neonatal intensive care  
48  
49 64 nurse which may have affected the interpretations drawn in this study.  
50  
51 65 • The explorative study design was suitable for describing a complex process without measurable  
52  
53 66 clinical outcomes.  
54  
55  
56  
57  
58  
59  
60

## 67 BACKGROUND

68 The neonatal intensive care unit (NICU) is a specialized intensive care unit that serves as its own  
69 emergency department, intensive care unit and a pre- and postoperative ward, requiring a wide array of  
70 interrelated multi-professional teams to operate in a coordinated fashion. The many roles of the unit are  
71 coupled with the pressures of maintaining high-quality and individualized care, family support and safe  
72 care practices. Some situations are manageable by reorganizing teams internally while others require  
73 cooperation with external units.

74 The NICU is distributed over three hospitals in an integrated network of independent units organized  
75 under one head of department. Daily operations are overseen by the strategic operations manager to  
76 ensure collaboration for overall performance across the three units. The overarching goals as  
77 understood by the authors are individualized care, family support, high quality care and safe care  
78 practices (Figure 1).

79 [Insert figure 1 here]

80 Maintaining quality and safety is a persistent problem considering acute admissions, staff shortage and  
81 rapidly deteriorating patients with life-threatening conditions (1,2). Safety is often defined as one of  
82 many variations of 'the absence of preventable harm to a patient during the process of health care' (3).  
83 During the last decades of patient safety research a movement towards an inclusive view of supporting  
84 the healthcare systems' ability to sustain required (normal) operations has emerged, the resilience  
85 engineering (RE) perspective (4). An important point made within the RE perspective is that safety can  
86 be enhanced by a combination of structure and control on one hand and adaptations on the other (5).

1  
2  
3 87 Healthcare is to be understood as a complex sociotechnical system (6). It is not only defined by the  
4  
5 88 boundaries of physical locations (7). People with their skills and relationships, rules, regulations and  
6  
7 89 even work place culture may impact system performance (6). Research on resilience in healthcare  
8  
9 90 suggest that successful as well as unsuccessful outcomes emerge from the fluid arrangement of system  
10  
11 91 components (coordination) (8). Coordination is defined as “...*the deliberate and orderly alignment or*  
12  
13 92 *adjustment of partners’ actions to achieve jointly determined goals*” (9). ‘Partners’ in the healthcare  
14  
15 93 setting are those who share a common goal of delivering care to patients. People who perform  
16  
17 94 coordinative work are a part of a “*process by which team resources, activities, and responses are*  
18  
19 95 *organized to ensure that tasks are integrated, synchronized, and completed within established temporal*  
20  
21 96 *constraints*” (10).

22  
23  
24  
25  
26 97 Although coordination is an integral part of everyday healthcare management we know very little about  
27  
28 98 how *managers* learn the strategies they use and which of the work practices they develop that are  
29  
30 99 successful (11,12).

31  
32  
33  
34 100 This study aims to explore how system resilience is enhanced by naturally occurring coordination  
35  
36 101 performed in situ by a management team (i.e. clinical coordinators, head nurses, senior medical doctors)  
37  
38 102 under variable circumstances.

## 39 40 41 42 103 **METHODS**

### 43 44 45 46 104 **Design and setting**

47  
48  
49  
50 105 This study uses an explorative ethnographic design using participatory observations and an abductive  
51  
52 106 approach to capture and analyse naturally occurring coordination in situ (13). The reason for focusing  
53  
54 107 on action-interaction was to capture a deep understanding of the varying conditions under which



1  
2  
3 108 decisions and coordination took place (14). The Standards for Reporting Qualitative Research (SRQR)  
4  
5 109 checklist was used to improve the transparency of research (15).  
6  
7

8  
9 110 The study took place in a tertiary level NICU with an approximate capacity of 70 cots divided over three  
10  
11 111 wards located in separate hospitals. The patient mix of the three wards is dependent on local factors  
12  
13 112 such as the size and risk profile of adjacent delivery wards and the availability of paediatric surgical  
14  
15 113 capacity. Staffing for the high acuity patients is normally one nursing team per two patients (one nurse  
16  
17 114 and one assistant nurse). Paediatricians and neonatologists are allocated over the three wards  
18  
19  
20 115 depending on availability and competence.  
21  
22

23 116 Each of the three wards is managed by a clinical coordinator, a head nurse and an operations manager  
24  
25 117 during daytime (Figure 1). The clinical coordinator performs tasks such as rostering, planning for patient  
26  
27 118 flows (admissions, discharges and transports) and does clinical work when needed. The head nurse is  
28  
29 119 formally responsible for the work environment and quality of care. The operations manager is a senior  
30  
31 120 neonatologist with an overall responsibility for the medical quality and patient flow. A strategic  
32  
33 121 operations manager has mandate to move patients between hospitals within the own organisation or to  
34  
35 122 hospitals outside the region. All managers are clinical specialists (nurses and neonatologists). Hereafter  
36  
37 123 we will refer to this team as the management team.  
38  
39  
40

#### 41 42 124 **Data collection**

43  
44  
45  
46 125 Data was collected between January and February 2017. The head of the department gave permission  
47  
48 126 to conduct participant observations at the unit. All staff was informed about the procedures in a staff  
49  
50 127 meeting and they were informed that they could decline from being observed at any time according to  
51  
52 128 the ethics approval. The clinical coordinators (four individuals) gave written consent to being shadowed  
53  
54  
55  
56  
57  
58  
59  
60

1  
2  
3 129 after receiving written and oral information. The coordinators were all women, experienced nurses with  
4  
5 130 more than 10 years of NICU experience.  
6  
7

8  
9 131 Data collection was structured in iterative cycles of collection and analysis, starting with descriptive  
10  
11 132 observations to get familiar with the work environment and relevant aspects of the managers' work  
12  
13 133 (16). The descriptive observations focused primarily on 'places' where the coordination of work was  
14  
15 134 apparent, for example at the head nurses and secretaries open office area and at the management  
16  
17 135 teams' office at the center of the ward. The intermittent recording and analysis of field notes during  
18  
19 136 initial observations yielded research questions that were in focus during the following observations.  
20  
21  
22

23 137 The focused observations targeted selected situations such as rostering for the next shift, start-up  
24  
25 138 meetings and handovers between shifts in addition to shadowing of coordinators. Data was collected  
26  
27 139 through ad-hoc interviews with staff and managers during or after the shadowing (16). Shadowing  
28  
29 140 meaning "following people, wherever they are, whatever they are doing" (17). Artefacts, including  
30  
31 141 coordinators' notes on patients' medical status, occupancy- and rostering charts were copied and  
32  
33 142 collected. All relevant aspects of the environment were captured in field notes during or after the  
34  
35 143 observations, along with researcher's memo-writing over personal reflections and thoughts about what  
36  
37 144 was happening.  
38  
39  
40

## 41 42 145 **Analysis**

43  
44  
45  
46 146 All meetings and interviews were audio recorded and transcribed verbatim. Transcriptions from tape-  
47  
48 147 recorded dialogues were placed in a correct temporal order along with the field notes, so that the mix of  
49  
50 148 field notes and transcription chronologically represented the full workday. Transcripts were read  
51  
52 149 through several times, followed by discussions in the research group about the level of detail in the data  
53  
54  
55 150 and reflections KH had regarding the observed work shift (18). The initial inductive analysis went  
56  
57  
58  
59  
60

1  
2  
3 151 through a two-step process (columns two and three in Table 1). First, a conversation or a situation of  
4  
5 152 relevance for the study's aim (a meaning unit) was selected and the question "What is happening here?"  
6  
7 153 was directed to the data. Next, the selected conversation or situation was analysed in the context of the  
8  
9  
10 154 entire scene where it took place, with the question "Why or how is it happening here?". The  
11  
12 155 interpretation was condensed and labelled with one or several codes (Table 1). The codes and their  
13  
14 156 relations were frequently discussed in the research team and sorted into tentative sub- and main  
15  
16 157 categories. Field notes were included in the analysis as means to reflect on the researchers' pre-  
17  
18 158 understanding of the context. Moving back and forth between induction and deduction was a way to  
19  
20  
21 159 discover meaningful underlying patterns that made it possible to integrate concrete behaviour and deep  
22  
23 160 contextual structures. Lastly, a deductive comparison of interdependencies between the main  
24  
25 161 categories and sub-categories in relation to the theoretical concept of resilience was performed (14).  
26  
27  
28  
29  
30  
31  
32  
33  
34  
35  
36  
37  
38  
39  
40  
41  
42  
43  
44  
45  
46  
47  
48  
49  
50  
51  
52  
53  
54  
55  
56  
57  
58  
59  
60

review only

162

**Table 1** Example of the analysis in two-steps: going from *raw data* to *interpretation of incident* and to *analytical interpretation in context, code* and *memo*.

| Raw data                                                                                                                                                                                                                                                                                                                                                | Interpretation of incident                                                                                                                                                                                                                                                                                                    | Analytical interpretation in context                                                                                                                                                                                                                                                                                                                    | Code                                                                       | Memo                                                                                                                                                                                                                                                                                                                                      |
|---------------------------------------------------------------------------------------------------------------------------------------------------------------------------------------------------------------------------------------------------------------------------------------------------------------------------------------------------------|-------------------------------------------------------------------------------------------------------------------------------------------------------------------------------------------------------------------------------------------------------------------------------------------------------------------------------|---------------------------------------------------------------------------------------------------------------------------------------------------------------------------------------------------------------------------------------------------------------------------------------------------------------------------------------------------------|----------------------------------------------------------------------------|-------------------------------------------------------------------------------------------------------------------------------------------------------------------------------------------------------------------------------------------------------------------------------------------------------------------------------------------|
| The observation begins in the flow room. The flow room is a small room with two workstations where the coordinator has her seat. There are several information sources hanging on the walls and post-it notes on the computers. The coordinator meets the observer in the flow room after having walked around the ward to check all the patient rooms. | In the physical environment, several different communication tools are gathered within a small area, i.e., tools used to summarize, remember, and disseminate important information. Information exchange occurs on paper notes stuck to computers, through software, and when the coordinator herself walks around the ward. | Information exchange is one part of coordination and can be performed through predefined channels and tools, but also more intuitively through physical meetings within the ward while the manager compares notes to what is experienced. The environment has been adapted for having several different information channels intersecting in one place. | Adapting environment – cluster tools for facilitating information exchange | The coordinator has gathered information about the current situation in the patient rooms by walking around and taking a look. She then looks at the system level, occupancy lists, and information from the other coordinators. If coordination means exercising control, real life information gathering is probably an important step. |
| The coordinator sits down at a computer and begins counting patients on her paper copy of the occupancy list and in TakeCare [electronic health record]. She reports the occupancy in Belport [national occupancy chart] and talks a bit about this.                                                                                                    | Counting patients and manually entering the number into the national occupancy report is one of the first things the coordinator does in the morning.                                                                                                                                                                         | The coordinator gets an idea of the status and distributes it to the rest of the country as information. This is proactive management, as future coordination may become easier if reference can be made to Belport, or if you know that the other units in the country your information.                                                               | Information handling                                                       | Reporting your status is a way of exercising control by impacting others perception regarding the degrees of freedom at your end.                                                                                                                                                                                                         |

## 163 PATIENT AND PUBLIC INVOLVMENT

164 Public and patient involvement was not applicable in this research.

1  
2  
3 165 **RESULTS**  
4  
5  
6

7 166 The analysis resulted in six subcategories and two unifying main categories (table 2).  
8  
9

10 167 The 'how' and 'when' of coordination is presented in Table 2 that illustrate the functional relationship  
11  
12 168 between the two main categories *adjustments to meet the actual situation* and *maneuverability* with  
13  
14 169 their respective sub-categories. The sub-categories *Supporting system cohesion* and *Extending system*  
15  
16 170 *boundaries* describe the joint work of managers and clinical staff. *Adapting the structure and roles of the*  
17  
18 171 *coordinating management team* and *Shifting between information sources for better sensemaking*  
19  
20 172 describe the management team's internal work.  
21  
22  
23

24 173 Extracts from the field notes and conversations are presented to clarify the findings. More  
25  
26 174 comprehensive material is provided in Appendix 1.  
27  
28  
29  
30  
31  
32  
33  
34  
35  
36  
37  
38  
39  
40  
41  
42  
43  
44  
45  
46  
47  
48  
49  
50  
51  
52  
53  
54  
55  
56  
57  
58  
59  
60



1  
2  
3 178 Managers face situations where they must balance a limited number of staff and demands for high  
4  
5 179 occupancy with the task of supporting clinical teams in their care of patients. Unpredictable factors such  
6  
7 180 as acute admissions, staff availability and the medical progression of patients put managers in situations  
8  
9  
10 181 where they might quickly have to re-adjust and re-plan, often ad-hoc with scarce information of the  
11  
12 182 overall situation. Part of the observed dialogue relate to the management team's efforts to identify  
13  
14 183 alternative ways forward. See quotes at the head of Table 2. Further examples of the choices made  
15  
16 184 under each sub-category of manoeuvrability is presented in table 3.

17  
18  
19 185 In the quote below, the head nurse acknowledges that the inflow of emergency patients is sometimes  
20  
21 186 impossible to avoid.

22  
23  
24 187 *"The patient flow, do you participate in that?" (Observer). "No, no more than that I can say 'stop',*  
25  
26 188 *because I don't have the staffing." (Head nurse). "Ok, so you can say that too?" (Observer). "Mm, I can*  
27  
28 189 *say that I have five or six teams. But..." (Head nurse). "But you cannot say stop today." (Coordinator).*  
29  
30 190 *"No, but it is like that. Even if we say stop the babies are being born. And we have to take care of them."*  
31  
32 191 *(Head nurse).*

33  
34  
35  
36  
37 **Table 3** Examples of 'situations' and 'choices made' sorted under each sub-category of manoeuvrability.

| Losing control – reorganisation                                                                                                                                                                                                                                                                                                                                                                                                                                                                                                                                                                                                                                                                                                                                                                                    | Stretching the system to work outside ordinary conditions                                                                                                                                                                                                                                                                                                                                                                                                                                                                                                                                                                                             | Everyday work under ordinary conditions                                                                                                                                                                                                                                                                                                                                                                                                     |
|--------------------------------------------------------------------------------------------------------------------------------------------------------------------------------------------------------------------------------------------------------------------------------------------------------------------------------------------------------------------------------------------------------------------------------------------------------------------------------------------------------------------------------------------------------------------------------------------------------------------------------------------------------------------------------------------------------------------------------------------------------------------------------------------------------------------|-------------------------------------------------------------------------------------------------------------------------------------------------------------------------------------------------------------------------------------------------------------------------------------------------------------------------------------------------------------------------------------------------------------------------------------------------------------------------------------------------------------------------------------------------------------------------------------------------------------------------------------------------------|---------------------------------------------------------------------------------------------------------------------------------------------------------------------------------------------------------------------------------------------------------------------------------------------------------------------------------------------------------------------------------------------------------------------------------------------|
| <p><b>Situation with several problematic trade-offs.</b><br/>The coordinator approaches the head nurse when she cannot find a suitable cot for a new patient (Field-notes).<br/>"We have another problem." (Coordinator).<br/>"Right, what?" (Head nurse). "This new week 28 [patient], I cannot put in room 10 [a room with four cots, one is available], the other baby in there is terminal and about to die." (Coordinator). "But if we place him in room 16 or 15?" (Head nurse). "No, I can't put it in 15 because I have two cots in there for the twins and they must be together [also incoming patients]." (Coordinator).<br/>[...] "We cannot have the twins remaining at the stabilisation unit at delivery, there might be another patient coming in." (Coordinator). "Okay, because I thought it</p> | <p><b>Exploring options to avoid patient transfers because of staff shortage.</b><br/>"NN [strategic operations manager] think that we can conserve personnel by moving 'K' [a patient] to 'Ts' room [another patients]." (Head nurse). "Okay." (Observer). "But I am not so sure we conserve personnel by that; and the family have already moved several times, you know that they are the ones that was supposed to be moved to [another hospital]." (Coordinator). "Okay" (Observer). "It [the patient] started to have breathing problems and came back. And now after moving back here they will have to move again 'sigh'." (Coordinator).</p> | <p><b>The deliberate adaptation of an administrative routine.</b><br/>"I have talked to NN [a nurse currently placed at the emergency stabilisation unit in the delivery ward] because there is a week 35 baby there that the doctor did not want to take it up to the ward during the nightshift." (Coordinator). "No?" (Observer). "Yes, then he has of course been there a little longer that his allowed six hours." (Coordinator).</p> |

|                                                                                                                                                                                                                                                                                                                                                     |  |  |
|-----------------------------------------------------------------------------------------------------------------------------------------------------------------------------------------------------------------------------------------------------------------------------------------------------------------------------------------------------|--|--|
| <p>would be a better idea to move the twins directly from delivery [to another hospital] if they need to move anyway at some point." (Head nurse). "Mm, but where should they move. All hospitals are full [in the county]. We would have to move them out of county." (Coordinator). "Yes, we will never be allowed to do that." (Head nurse).</p> |  |  |
|-----------------------------------------------------------------------------------------------------------------------------------------------------------------------------------------------------------------------------------------------------------------------------------------------------------------------------------------------------|--|--|

192

### 193 ***Everyday work under ordinary conditions***

194 The management team have planned meetings; they sweep the ward to collect information on the state  
195 of things and relay high level plans to workers.

196 *The coordinator begins her shift by conducting a walkaround of the ward, saying hello to the nurses and  
197 doctors as she is asking if everything is all right. After the walkaround she sits down to begin exploring  
198 her staff roster and patient occupancy charts (Field-notes).*

199 Under ordinary conditions there is a minimal observable need for managers to manually adapt  
200 information they extract from technical systems, regarding for example occupancy, patient acuity levels  
201 and staffing. Managers describe how their experience of the technical systems' limitations are learned  
202 on the job and how workarounds are taught between individuals.

203 *The coordinator makes a note of something on her occupancy chart (Field-notes). "What did you write on  
204 that chart?" (Observer). "CT 11:15 [Computer Tomography at 11:15]." (Coordinator). "And it is used for  
205 that kind of information?" (Observer). "I print one of these charts because there is more space to write  
206 on. I think... I think many... I think NN and NN [two other coordinators] use this too. And NN [another  
207 coordinator] use it because I taught her. And I use it because NN [a coordinator who quit earlier] taught  
208 me." (Coordinator). "Okay, that is nice. But is it the same information you all use it for?" (Observer).  
209 "Well, I don't know?" (Coordinator). "Not important?" (Observer). "Well, I don't think so, I use it for...  
210 those that are planned for other hospitals, delivery ward, antenatal... Oh! I forgot to write that today  
211 [makes another note on the chart] and stuff that I need to do." (Coordinator).*



1  
2  
3 212 ***Stretching the system to work outside ordinary conditions***  
4  
5

6 213 The following situation is a typical example of how the management team must re-organize and adapt  
7  
8 214 to stretched conditions. The ad-hoc meeting in the example illustrates that strategic goals of family  
9  
10 215 centred care and optimal staff allocation are traded for immediate medical priorities, basic safe care  
11  
12 216 practises and protection of the wider system. Other patients on the ward are cared for by their  
13  
14  
15 217 respective teams, avoiding exposure of this emerging crisis because it is handled by the paediatric  
16  
17 218 emergency transport team.  
18  
19

20 219 *The plan for this day is to admit one intermediary level patient that was born during the night and is*  
21  
22 220 *waiting for a cot at the NICU. One patient has been diagnosed with a multi-resistant bacterium and will*  
23  
24 221 *need increased hygiene standards (Field- notes) [...] “We are plenty of people today, which is nice. But*  
25  
26 222 *when NN [strategic operations manager] asked if we had a lot of capacity, I had to say no.” (Clinical*  
27  
28 223 *coordinator). [...] “...one important thing. This baby that needed eye surgery is now acute and will arrive*  
29  
30 224 *soon. They will land directly in the operating room and the transport team will take care of the baby until*  
31  
32 225 *it can go back home to its own hospital. (Operations manager). [Q2 – Appendix 1]*  
33  
34  
35

36 226 The plan for postoperative care after acute eye-surgery was for the patient to be assigned a cot and a  
37  
38 227 nursing team on the ward. The situation was managed by using the transport team to temporarily care  
39  
40 228 for the baby inside the operating room until it was stable enough for transport to another hospital. This  
41  
42 229 decision had possible implications for the whole management team. The clinical coordinator wanted to  
43  
44 230 know about the utilisation of staff and facilities. The head nurse about workplace safety, quality of care  
45  
46 231 and economy. The operations manager had responsibility for the medical quality and the strategic  
47  
48 232 operations manager for the possibility of helping one of the other wards with staffing.  
49  
50  
51

52  
53 233 ***Losing control – reorganisation***  
54  
55  
56  
57  
58  
59  
60

1  
2  
3 234 The category of 'losing control' was characterised by managers shedding managerial tasks for  
4  
5 235 participating in clinical emergency work, isolating problems and focusing on re-creating manoeuvrability.  
6  
7 236 The focus was to protect clinical teams from being exposed to the rapidly shifting plans and priorities at  
8  
9 237 the managerial level. Strategies for regaining control can be to sacrifice the goal of continuity by  
10  
11 238 transferring at-risk mothers to other hospitals (deferral), or to temporarily transfer additional weight of  
12  
13 239 medical care to neighbouring sub-systems such as the paediatric emergency transport team or the  
14  
15 240 managers themselves.

16  
17  
18  
19 241 The following situation illustrates a reorganisation at the verge of losing control. The coordinator tried to  
20  
21 242 reserve an empty cot for possible additional acute emergency admissions.

22  
23  
24 243 *"This is not good, its full [the ward]. We have no space when this eye baby arrives."* (Clinical  
25  
26 244 coordinator). *The clinical coordinator walks to the room where a nurse oversees the twins that were*  
27  
28 245 *supposed to be transported out the next day but are now showing symptoms of infection. (Field- notes).*  
29  
30 246 *"Do you think these twins could be together in a twin cot?"* (Clinical coordinator) [...] *"Well, I don't know.*  
31  
32 247 *This one is just on the margin of managing without incubator."* (Nurse) [...] *"The problem is that I don't*  
33  
34 248 *have staff to open another room."* (Clinical coordinator). [Q3 – Appendix 1]

35  
36  
37  
38  
39 249 The manager handled the situation by putting twins together in one cot, thereby utilising one nurse to  
40  
41 250 care for three babies which is more than the goal of two babies per nurse. This manoeuvre created an  
42  
43 251 opportunity to temporarily handle five patients (with one empty emergency cot) in a room with staffing  
44  
45 252 for four. The nurse expressed concern for her patient but remained focused on finding a solution.

46  
47  
48 253 When the managers started shedding managerial tasks for bedside operative work, they risked losing  
49  
50 254 the ability to meet other managers and keep up to date with the ward. Management decisions in these  
51  
52 255 situations were then based on a narrower understanding of the bigger picture. Computer aides were  
53  
54 256 less used (or not at all) because of their inability to present rapidly changing borderline conditions.

1  
2  
3 **257 Adjustments to meet the actual situation**  
4  
5

6 258 It was observed how the mandate for making decisions was distributed across the management team  
7  
8 259 and clinical nursing teams (speech bubbles in figure 2). The clinical coordinator moved freely across the  
9  
10 260 unit and made independent decisions regarding resource allocation, rostering and whether to shed her  
11  
12 261 own managerial work to help the clinical teams. The clinical coordinator also provided the other  
13  
14 262 managers with information when they needed to adjust their plans.  
15  
16

17  
18 263 [Insert figure 2 here]  
19  
20

21  
22 **264 Supporting system cohesion**  
23  
24

25 265 Members of the management team were observed to often communicate through ad-hoc meetings  
26  
27 266 where verbal information was compared to patient rosters, patient conditions, staffing and workload  
28  
29 267 indicators. They worked close to the clinical context and discussed the current goals' attainment for  
30  
31 268 individual clinical teams and what the current trade-offs were. The managers compared computer- and  
32  
33 269 paper-based notes, as well as information provided at start-up meetings to update themselves of the  
34  
35 270 status of the ward and where the situation was heading (umbrella perspective in Figure 2).  
36  
37

38  
39 271 *The coordinator is back in room nine to alleviate the staff for lunch. She checks in on the baby that has*  
40  
41 272 *been in acute surgery for intestinal obstruction. There are lots of beeping sounds, but no one seems*  
42  
43 273 *alarmed. The head nurse enters the room and seeks the coordinators attention, but initially fails as the*  
44  
45 274 *coordinator is tending to a patient. Eventually the coordinator looks up (Field-notes). "Didn't they [the*  
46  
47 275 *surgeons] say already this morning that this patient was up for re-operation?" (Coordinator). "After*  
48  
49 276 *lunch apparently. Then what do we do with NN [another patient]?" (Head nurse).*  
50  
51

52  
53 277 In the example above the managers discussed how two patients' trajectories were affected by the  
54  
55 278 surgeons rescheduling. The management team negotiated situations that needed simultaneous  
56  
57  
58  
59  
60

1  
2  
3 279 attention, like prioritizing readiness and clinical capacity in some parts of the ward while maintaining  
4  
5 280 family centered care and staff education in others (Illustrated as the three clinical teams in Figure 2).  
6  
7

### 8 281 ***Extending system boundaries***

9  
10  
11 282 The need for extending the system's boundaries emerged as the pressure of prioritizing decisions  
12  
13 283 increased. The management team made use of other units' facilities or staff, like delaying patients in the  
14  
15 284 operating theatre or letting a transport team care for the patient for some time before handing it over  
16  
17 285 to the regular staff. The management team utilised auxiliary staff and overlapping competencies of  
18  
19 286 different professional groups. Sometimes the managers themselves doubled as clinical staff within their  
20  
21 287 vocation.  
22  
23  
24

25  
26 288 *"It is already a little tight if it arrives [the surgery baby], right now we have low workload in room nine*  
27  
28 289 *and ten with four patients and the other goes back to [another hospital out in another region] at five [in*  
29  
30 290 *the afternoon]. We hope. But it is also, I mean, if there is an acute admission and he... I do not think NN*  
31  
32 291 *[a nurse] can have four patients by himself out there. Since the father needs quite a lot of help."*  
33  
34 292 *(Coordinator). "They are really good patients those babies" (Operations manager). "What about the*  
35  
36 293 *midwives then? [that belongs to the adjacent delivery ward]" (Coordinator). "There are four of them*  
37  
38 294 *[turns to face the operations manager]?" (Head nurse). "Yesterday someone said that you can have four*  
39  
40 295 *patients by yourself." (Operations manager). "Not by yourself" (Coordinator). "With an assistant nurse."*  
41  
42 296 *(Head nurse). "Yes with an assistant yes, that is okay but." (Coordinator). "So there are three patients*  
43  
44 297 *left?" (Head nurse). "And then we have put two in the same cot at 9:1 [bed one in room nine]." (Head*  
45  
46 298 *nurse 2). "Okay." (Head nurse).*  
47  
48  
49

### 50 51 299 ***Adapting the structure and roles of the coordinating management team***

1  
2  
3 300 The management team fluently adapted its own structure in situations where there were not enough  
4  
5 301 resources to manage within everyday routines, when there was urgency or when some of the  
6  
7 302 management team members were not available with their specific expertise and mandate. This  
8  
9  
10 303 structural adaptation was observed when individuals in the management team shifted from relaying  
11  
12 304 plans from top-down to working with patients and gathering information from bottom-up.

13  
14  
15 305 *“In room nine is that week 22 baby that came in yesterday. They are intubating now so they use a lot of*  
16  
17 306 *people. There were no head nurses here at seven, so I decided myself that NN [nurse] got to be alone at*  
18  
19 307 *the stabilisation room [at the delivery ward]. The doctors there have to work a little harder now.”*  
20  
21  
22 308 *(Clinical coordinator).*

### 23 24 25 309 ***Shifting between information sources for better sensemaking***

26  
27  
28 310 As the situation on the ward became more complex the management team increased their reliance-on  
29  
30 311 handwritten notes rather than the standard computer-generated lists for staffing and patient acuity  
31  
32 312 information.

33  
34  
35  
36 313 The coordinator used handwritten notes as memory aides in team discussions. The notes were mainly  
37  
38 314 short markings, phrases, or single words in the margins like “discharge planned” or “need antibiotics”.  
39  
40 315 The limitations of computer-generated patient rosters to convey this type of information on real world  
41  
42 316 complexities were expressed by members of the management team.

43  
44  
45  
46 317 The national occupancy chart for example was only able to classify patients as high or low acuity without  
47  
48 318 regards of other factors. When there was a need to work outside the binary world of two patient  
49  
50 319 groups, the team stopped using this computer-generated aide and instead relied on their own domain  
51  
52 320 knowledge, personal network and the stability of the management teams’ understanding of the bigger  
53  
54 321 picture.

1  
2  
3 322 “Well and this is actually look correct [number of beds in the national occupancy chart] 14 in total. But  
4  
5 323 with the stabilisation beds. That makes it 12 here plus two there... But it is also a little [inaccurate].  
6  
7 324 Because then you calculate [all of them as intensive care beds]. The stabilisation beds are supposed to be  
8  
9 325 low acuity”. (Clinical coordinator)

10  
11  
12  
13 326 The following quote illustrates what happens when the computerised information indicated normal  
14  
15 327 occupancy when the off-going night nurse reported understaffing for the same shift.

16  
17  
18 328 “How did this happen?” (Clinical coordinator).

19  
20  
21  
22 329 “Well, because NN [one of the nurses] who is work-training after sick leave was included in the staffing.

23  
24 330 The parenthesis was probably put there later [points at the handwritten parenthesis in the rostering  
25  
26 331 folder, indicating that NN should not be included in the staffing]”. (Night nurse)

## 30 332 **DISCUSSION**

31  
32  
33  
34 333 The management team in this study exhibited a range of mindful adaptations for sustaining the units’  
35  
36 334 capacity for expressing resilience. Such as sacrificing low level goals based on up-to date information  
37  
38 335 and continuous assessments of what would be minimally intrusive for the overall performance of the  
39  
40 336 system (figure 2). Our findings elucidate a link between adjustments to meet the actual situation and the  
41  
42 337 available manoeuvrability of the system.

### 43 44 45 46 338 **Supporting coherence**

47  
48  
49  
50 339 The management team aimed to balance the demands and capacity of multiple teams that operate in  
51  
52 340 separate rooms while tending to patients with a wide variety of problems and acuity. For practical  
53  
54 341 reasons the teams could not always meet to communicate with each other. A defining characteristic of a

1  
2  
3 342 multiteam system is the ability of component teams to modify individual goal hierarchies while sharing a  
4  
5 343 common distal goal or set of goals (12). During the observations the management team and the clinical  
6  
7 344 staff consequently agreed on making provision of acute care to rapidly deteriorating patients a top  
8  
9 345 priority, allowing us to identify it as a core mission (i.e. purpose of the system) (19). Other priorities  
10  
11  
12 346 were more likely to be put on hold and resumed later or to be permanently dropped.

13  
14  
15 347 When the care teams were unable to communicate, maintaining coherence was an important factor for  
16  
17 348 the managers' maintenance of an umbrella perspective i.e. what they needed in order to understand  
18  
19 349 how the bigger picture of their interventions fit together (20). At this point, we can say two things about  
20  
21 350 coherence, with implications for the training of managers as adaptive teams (21). First, that  
22  
23 351 coordination supported a coherent goal setting with increased team collaboration and second, that it  
24  
25 352 was enhanced by team members' ability to predict the most likely priorities of each other.

### 30 353 **Reorganising to support manoeuvrability**

31  
32  
33 354 Everyday work of the management team was characterised by seamlessly and actively organising and  
34  
35 355 reorganising. Our observations illustrate how the management team made use of early investments in  
36  
37 356 for example staff's expertise, deep domain knowledge and the workplace culture to maintain a unit  
38  
39 357 wide focus on the core mission (22). Allowing the care teams to adapt their goals individually  
40  
41 358 exemplifies that being resilient is to be part of a process of identifying conflicting goals in a complex,  
42  
43 359 intractable environment using "*numerous indicators in a proactive fashion to probe a system's adaptive*  
44  
45 360 *capacity before system-wide collapse results in disaster*" (21). A realisation from studying the  
46  
47 361 management team was the shapelessness of the organisation. We could not observe a formal agenda  
48  
49 362 for how and why the management team was supposed to prioritize in terms of goal achievement below  
50  
51 363 the core mission. Our study suggests that it is up to the management team to support the system by  
52  
53 364 using experience, professional ethos and domain knowledge to negotiate the way forward in a manner  
54  
55  
56  
57  
58  
59  
60

1  
2  
3 365 that resembles the fifth principle of managing the unexpected, as described by Weick and Sutcliffe (23).  
4  
5 366 Specifically, because the flexible decision structures enabled resilient performance when expertise and  
6  
7 367 experience outranked formal hierarchical positions.  
8  
9

10  
11 368 Important for the application of resilience in everyday clinical work was the link between adaptation and  
12  
13 369 outcome (successful or unsuccessful) as described in for example the CARE model for researching  
14  
15 370 resilience in healthcare (24). An adaptation is a deviation from work as planned, and it is not always  
16  
17 371 clear beforehand whether the outcome of an adaptation constitutes success or failure in terms of  
18  
19 372 quality and safety. Our study describes managers' adaptive responses to the conflicting demands of  
20  
21 373 acute patient care on one hand and long-term strategic demands on the other (measured as for  
22  
23 374 example respirator days, patient throughput and hospital acquired bloodstream infections).  
24  
25  
26

### 27 28 375 **Balancing between long- and short-term goals**

29  
30

31 376 Resilience depended on the use of earlier investments in 'potential opportunities for action' previously  
32  
33 377 described as degrees of freedom. However, low-level goal-sacrifices do represent a loss of potential  
34  
35 378 future degrees of freedom if it is overexploited. In the context of the NICU, families are less prepared for  
36  
37 379 discharge if they are not trained, staff might receive less time learning from experienced colleagues if  
38  
39 380 they do not work together and formal routines might erode if they are not employed.  
40  
41  
42

43  
44 381 The balancing act between seemingly irreconcilable goals makes it impossible to decide in retrospect  
45  
46 382 whether coordination was good or bad for the total outcome of the system. Each decision to suspend or  
47  
48 383 sacrifice a low-level goal has implications for the organisation's future capacity for expressing resilience.  
49  
50 384 All teams worked towards the core mission of providing acute care. However, the maintenance of long-  
51  
52 385 term investments was achieved by managing a diversity of low-level goal-sacrifices between many  
53  
54 386 clinical teams (i.e. sacrificing patient education in one and staff education in another). Our findings  
55  
56  
57  
58  
59  
60



1  
2  
3 387 suggest that in design of future research or training for coordination, the focus of assessment and  
4  
5 388 reflection should be on adaptive managerial responses in situations where the system is 'stretched' or  
6  
7 389 'in need of reorganization' (table 2). Furthermore, learning should be about whether the actions lead to  
8  
9 390 achievement of short-term goals while preserving the long-term goals.  
10  
11  
12

### 13 391 **Limitations**

14  
15  
16 392 This was a single centre study of a specialised unit with a specific patient clientele that cannot be cared  
17  
18 393 for by any other type of unit available. It was expected that the unit's high tempo and specialisation  
19  
20 394 would promote a particularly observable coordinative work with the risk that it might introduce the  
21  
22 395 argument of limited transferability to other areas of healthcare. We believe however that the  
23  
24 396 networked structure of three wards is not unique. The specific unit for study enabled us to capture and  
25  
26 397 understand the subtleties of everyday work of first line managers. Further studies are needed to  
27  
28 398 investigate how much of this work may be specific to organizations of both similar and contrasting  
29  
30 399 types.  
31  
32  
33  
34

35  
36 400 Using a qualitative cross-sectional design, this study does not allow us to define successful or  
37  
38 401 unsuccessful outcomes. Resilience is described based on the actions taken and further studies are  
39  
40 402 required to operationalise and test our results.  
41  
42

43  
44 403 The first author (KH) who conducted the fieldwork is an experienced neonatal intensive care nurse with  
45  
46 404 experience from the studied NICU. The familiarity with the specific type of work may have affected the  
47  
48 405 interpretations drawn in this study.  
49  
50

51 406 Trustworthiness during data analysis was addressed by regular peer-check and in seminars with the  
52  
53 407 wider research group and member check. The final analysis was individually validated with the  
54  
55 408 coordinators (25). The iterative process of data collection and analysis was intended to ensure that the  
56  
57  
58

1  
2  
3 409 analysis included more than one researcher's interpretation. Transferability was addressed by leaving an  
4  
5 410 audit trail of extracts from the data in the report so that readers from other fields can evaluate if the  
6  
7 411 results are transferable to their respective contexts (26). Table 1 of the methodological section provides  
8  
9  
10 412 a trail of how interpretations of data were made.

11  
12  
13 413 The use of voice recordings of meetings and conversations was limited to situations where verbal  
14  
15 414 consent could be obtained from all participants, unless explicitly asked not to by any of the participants  
16  
17 415 (27). In larger groups, where participants attended only partially this was not a feasible option and  
18  
19  
20 416 handwritten notes were taken, video recordings were not possible because of difficulties with assuring  
21  
22 417 patient anonymity in the clinical context.

## 23 24 25 26 418 **CONCLUSIONS**

27  
28  
29  
30 419 We are only beginning to understand managers' strategies for prioritising and acting on the variability of  
31  
32 420 degrees of freedom. Our findings suggest that managers at the clinical level, while being central to the  
33  
34 421 system's capacity for expressing resilience, do not have an explicit model or training for how they  
35  
36 422 approach their work. Furthermore, managers lack the aid of tailored decision support systems. This  
37  
38 423 could depend on well described challenges for design of such interventions (28). It is important that  
39  
40 424 healthcare policy and organisational redesign initiated at higher levels are well calibrated with the  
41  
42 425 nature of managerial work on the clinical level before interventions can be developed. Our  
43  
44 426 recommendations for future research and policy making is to prioritise definition and operationalisation  
45  
46 427 of successful coordination in a wide variety of contexts.  
47  
48  
49  
50  
51  
52  
53  
54  
55  
56  
57  
58  
59  
60

1  
2  
3  
4 428 **LIST OF ABBREVIATIONS**

5  
6  
7  
8 429 RE: Resilience Engineering;

9  
10 430 NICU: Neonatal Intensive Care Unit

11  
12  
13  
14 431 **DECLARATIONS**

15  
16  
17  
18 432 **Ethics approval**

19  
20  
21 433 This study was approved by the regional ethical review board of Stockholm (2016/1832-32).

22  
23  
24 434 **Consent for publication**

25  
26  
27 435 Not applicable.

28  
29  
30 436 **Availability of data and material**

31  
32  
33 437 Given that the data is in Swedish and the phrasing of the consent obtained from participants, complete  
34  
35 438 raw data are not available for public sharing. Partial datasets used and/or analysed during the current  
36  
37 439 study are available from the corresponding author on reasonable request. A selection of translated  
38  
39 440 quotes is supplied in the results and methods sections and in appendix 1.

40  
41  
42 441 **Competing interests**

43  
44  
45 442 The authors declare that they have no competing interests.

46  
47  
48 443 **Funding**

49  
50  
51 444 The authors received no specific funding for this work.

52  
53  
54  
55 445 **Author Contributions**

1  
2  
3 446 The study was initiated by KH. The study design was developed in collaboration within the research  
4  
5 447 team. KH performed the data collection. The analysis and interpretation of data was conducted in close  
6  
7 448 collaboration between KH, ME and KPH. KH wrote the first draft of the paper. All authors contributed  
8  
9 449 with writing, critical revisions and approval of the final version.  
10  
11

### 12 450 **Acknowledgement**

13  
14  
15 451 Thank to Professor Eric Hollnagel that contributed with theoretical expertise on the interpretation of  
16  
17 452 data; Professor Richard Cook for valuable discussions about system safety and methodology in the early  
18  
19 453 phase of the study. Thanks also to the participating Neonatal unit.  
20  
21  
22

### 23 454 **References**

- 24  
25  
26 455 1. Samra HA, McGrath JM, Rollins W. Patient safety in the NICU: A comprehensive review. *J Perinat*  
27  
28 456 *Neonatal Nurs.* 2011;25(2):123–32.  
29  
30  
31 457 2. Bondurant PG, Nielsen-farrell J, Armstrong L. The Journey to High Reliability in the NICU. *J*  
32  
33 458 *perinatal Nurs.* 2015;29(2):170–8.  
34  
35  
36 459 3. Kim L, Lyder CH, Mcneese-Smith D, Leach LS, Needleman J. Defining attributes of patient safety  
37  
38 460 through a concept analysis. *J Adv Nurs.* 2015;71(11):2490–503.  
39  
40  
41 461 4. Wears RL, Hollnagel E, Braithwaite J. *Resilient Health Care, Volume 2 : The resilience of everyday*  
42  
43 462 *clinical work.* Farnham: Ashgate Publishing Limited; 2015. 328 p.  
44  
45  
46 463 5. Eurocontrol. *From Safety-I to Safety-II: A White Paper.* *Netw Manag.* 2013;1–32.  
47  
48  
49 464 6. Braithwaite J, Churruca K, Ellis LA, Long J, Clay-williams R, Damen N, et al. *Complexity Science in*  
50  
51 465 *Healthcare – Aspirations, Approaches, Applications and Accomplishments: A White Paper.*  
52  
53 466 *Australian Institute of Health Innovation, Macquarie University. Sydney; 2017.*  
54  
55  
56  
57  
58  
59  
60

- 1  
2  
3 467 7. Cilliers P. Boundaries, Hierarchies and Networks in Complex Systems. *Int J Innov Manag*  
4  
5 468 [Internet]. 2001;05(02):135–47. Available from:  
6  
7 469 <http://www.worldscientific.com/doi/abs/10.1142/S1363919601000312>  
8  
9  
10 470 8. Cook RI. Taking Things in One’s Stride: Cognitive Features of Two Resilient Performances. In:  
11  
12 471 Hollnagel E, Woods DD, Leveson N, editors. *Resilience Engineering: Concepts and Precepts*  
13  
14 472 [Internet]. Burlington: Ashgate; 2006. p. 205–21. Available from:  
15  
16 473 <http://qualitysafety.bmj.com/lookup/doi/10.1136/qshc.2006.018390>  
17  
18  
19  
20 474 9. Gulati R, Wohlgezogen F, Zhelyazkov P. The Two Facets of Collaboration: Cooperation and  
21  
22 475 Coordination in Strategic Alliances. *Acad Manag Ann* [Internet]. 2012;6(1):531–83. Available  
23  
24 476 from: [http://search.ebscohost.com/login.aspx?direct=true&db=bth&AN=77495192&site=ehost-](http://search.ebscohost.com/login.aspx?direct=true&db=bth&AN=77495192&site=ehost-live&scope=site)  
25  
26 477 [live&scope=site](http://search.ebscohost.com/login.aspx?direct=true&db=bth&AN=77495192&site=ehost-live&scope=site)  
27  
28  
29  
30 478 10. Cannon-Bowers J, Tannenbaum S, Salas E, Volpe C. Defining team competencies: Implications for  
31  
32 479 training requirements and strategies. In: Guzzo R, Salas E, Associates, editors. *Team effectiveness*  
33  
34 480 *and decision making in organizations*. San Francisco, CA: Jossey-Bass; 1995. p. 333–80.  
35  
36  
37 481 11. Cook R, Woods D. The messy details: Insights from technical work studies in healthcare. In:  
38  
39 482 *Proceedings of the human factors and ergonomics society 47th annual meeting*. 2003. p. 2002–3.  
40  
41  
42 483 12. Mathieu J, Marks MA. Multiteam Systems. In: Anderson N, Ones D, Sinangil HK VC, editor.  
43  
44 484 *Handbook of Industrial, Work & Organizational Psychology*. London, England: SAGE Publications;  
45  
46 485 2001. p. 289–313.  
47  
48  
49  
50 486 13. Silverman D. *Interpreting Qualitative Data: Methods for Analysing Talk, Text and Interaction*. 2  
51  
52 487 nd. London, England: SAGE Publications; 2001. 325 p.  
53  
54  
55 488 14. Dubois A, Gadde LE. Systematic combining: An abductive approach to case research. *J Bus Res*.

- 1  
2  
3 489 2002;55(7):553–60.  
4  
5  
6 490 15. O’Brien BC, Harris IB, Beckman TJ, Reed DA, Cook DA. Standards for reporting qualitative  
7  
8 491 research: A synthesis of recommendations. *Acad Med*. 2014;89(9):1245–51.  
9  
10  
11 492 16. Spradley JP. Participant observation. New York: Holt, Rinehart and Winston; 1980. 195 p.  
12  
13  
14 493 17. Arman R, Vie OE, Åsvoll H. Refining shadowing methods for studying managerial work. In: *The*  
15  
16 494 *Work of Managers Towards a Practice Theory of Management* [Internet]. Oxford University Press;  
17  
18 495 2012. p. 301–17. Available from:  
19  
20 496 <http://www.oxfordscholarship.com/view/10.1093/acprof:oso/9780199639724.001.0001/acprof->  
21  
22 497 [9780199639724-chapter-16](http://www.oxfordscholarship.com/view/10.1093/acprof:oso/9780199639724.001.0001/acprof-9780199639724-chapter-16)  
23  
24  
25  
26 498 18. Strauss A, Corbin J. *Basics Of Qualitative Research: Techniques And Procedures For Developing*  
27  
28 499 *Grounded Theory*. 4 th ed. London: SAGE Publications; 1998. 456 p.  
29  
30  
31 500 19. Vicente KJ. *Cognitive work analysis : toward safe, productive, and healthy computer-based work*.  
32  
33 501 London, England: Lawrence Erlbaum Associates; 1999. xix, 392 p.  
34  
35  
36 502 20. Goldenhar LM, Brady PW, Sutcliffe KM, Muething SE. Huddling for high reliability and situation  
37  
38 503 awareness. *BMJ Qual Saf*. 2013;22(11):899–906.  
39  
40  
41 504 21. Gorman JC, Cooke NJ, Amazeen PG. Training adaptive teams. *Hum Factors*. 2010;52(2):295–307.  
42  
43  
44 505 22. Ekstedt M, Cook RI. The stockholm blizzard of 2012. In: *Resilient Health Care, Volume 2: The*  
45  
46 506 *Resilience of Everyday Clinical Work*. 2017. p. 59–74.  
47  
48  
49 507 23. Weick KE, Sutcliffe KM. *Managing the expected: Sustained performance in a complex world*. 3rd  
50  
51 508 ed. Wiley; 2015. 224 p.  
52  
53  
54 509 24. Anderson JE, Ross AJ, Jaye P. *Modelling Resilience and Researching the Gap between Work-as-*

- 1  
2  
3 510 Imagined and Work-as-Done. In: J. Braithwaite, R. L. Wears RL and EH, editor. Resilient Health  
4  
5 511 Care, Volume 3, Reconciling Work-as-Imagined and Work-as-Done. Farnham: Ashgate; 2017. p.  
6  
7 512 133–41.  
8  
9  
10 513 25. Lincoln YS. Emerging Criteria for Quality in Qualitative and Interpretive Research. Qual Inq  
11  
12 514 [Internet]. 1995 Sep 29;1(3):275–89. Available from: [http://methods.sagepub.com/book/the-](http://methods.sagepub.com/book/the-qualitative-inquiry-reader/n19.xml)  
13  
14 515 qualitative-inquiry-reader/n19.xml  
15  
16  
17 516 26. Elo S, Kääriäinen M, Kanste O, Pölkki T, Utriainen K, Kyngäs H. Qualitative Content Analysis. SAGE  
18  
19 517 Open. 2014;4(1):215824401452263.  
20  
21  
22 518 27. Johnson B. Ethical issues in shadowing research. Qual Res Organ Manag An Int J [Internet].  
23  
24 519 2014;9(1):21–40. Available from: [http://www.emeraldinsight.com/doi/10.1108/QROM-09-2012-](http://www.emeraldinsight.com/doi/10.1108/QROM-09-2012-1099)  
25  
26 520 1099  
27  
28  
29 521 28. Praetorius G, Hollnagel E, Dahlman J. Modelling Vessel Traffic Service to understand resilience in  
30  
31 522 everyday operations. Reliab Eng Syst Saf. 2015;141:10–21.  
32  
33  
34

### 35 523 **Figure legends**

36  
37  
38 524 **Fig. 1** The studied NICU in a tertiary level hospital with surgical capacity. Managers are visually located to illustrate  
39  
40 525 their vicinity to the clinical care teams. Overarching goals are presented at the base of the figure with examples of  
41  
42 526 how they are expressed in daily work. A selection of peripheral wards and units are illustrated in the surrounding  
43  
44 527 area. The arrows are double headed to symbolise a two-way relationship of demands and possibilities for  
45  
46 528 negotiation of for example patient transfers.  
47  
48  
49

50 529 **Fig. 2** Illustration of the work of balancing goal-settings for system wide coherence, maintaining the umbrella  
51  
52 530 perspective and streamlining communication to meet rapidly changing demands with the shadowed clinical  
53  
54 531 coordinator at the centre. The width of double headed arrows visualises an estimation of the most frequently  
55  
56 532 observed communication for the respective manager.  
57  
58  
59  
60

533

For peer review only



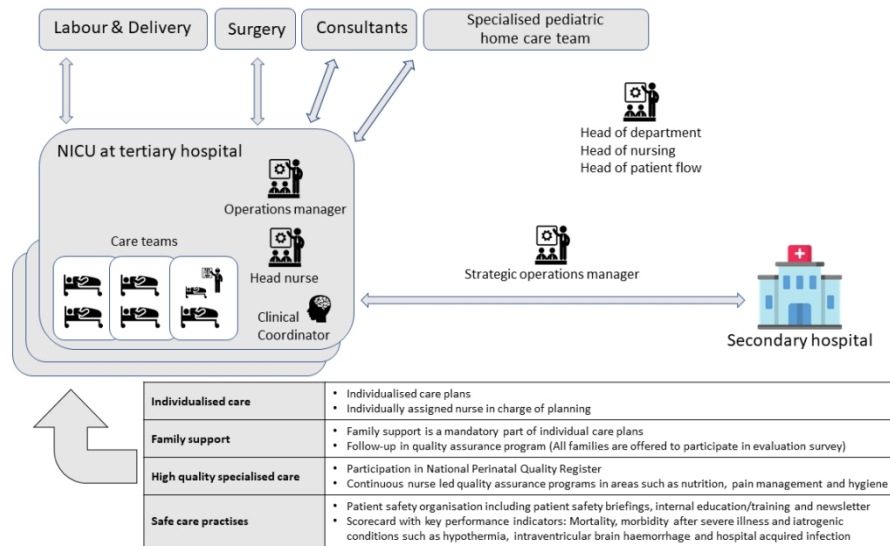

Fig. 1 The studied NICU in a tertiary level hospital with surgical capacity. Managers are visually located to illustrate their vicinity to the clinical care teams. Overarching goals are presented at the base of the figure with examples of how they are expressed in daily work. A selection of peripheral wards and units are illustrated in the surrounding area. The arrows are double headed to symbolise a two-way relationship of demands and possibilities for negotiation of for example patient transfers.

108x60mm (300 x 300 DPI)

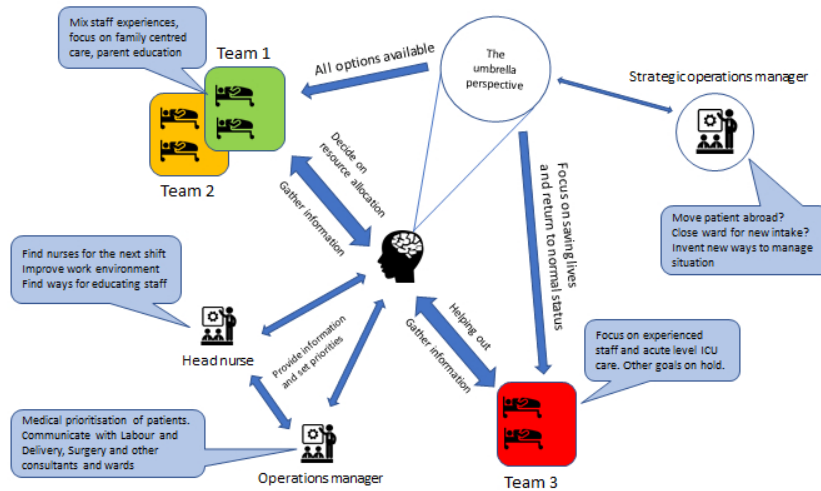

Fig. 2 Illustration of the work of balancing goal-settings for system wide coherence, maintaining the umbrella perspective and streamlining communication to meet rapidly changing demands with the shadowed clinical coordinator at the centre. The width of double headed arrows visualises an estimation of the most frequently observed communication for the respective manager.

67x38mm (300 x 300 DPI)

## Appendix 1

### Q1

(Clinical coordinator) We have put those two [patients] together in 9:1 to get an emergency cot in 9:2 for the twins [9 refers to a room divided in two sections equipped for one patient per section 9:1 and 9:2], I told the father that they may have to move out. But then we'll be in the situation where they maybe... They may need... That father is very new. So, I think that in that case they'll have to be two [staff] out there too.

(Operations manager) The [NN] twins?

(Head nurse) Right. Now there are two kids there, so one person can take care of them. But if you add those two [twins] then there'll be four babies, so then you need another person out there [on the ward] and there'll only be two staff left in there [room 9].

(Operations manager) Mm, it's tricky.

(Head nurse) Oh... so there are three of them who can help each other and... in [room] 7 and 8?

(Operations manager) Okay... I understand that to mean that we have a bit of leeway here if we need it in an emergency... but nothing that we can give to anyone else. Okay. [previously wanted to lend a nurse to another ward in need]

(Head nurse) Yeah, that's too bad. We'd love to be able to.

(Operations manager) Take over week 36 twins who need it, say. And then send them back, that's no fun.

(Clinical coordinator) And then we'd have to open like [rooms] 13 and 14.

### Q2

The coordinator calls for an ad-hoc on-site face-to-face discussion with the strategic operations manager. This happens when the CMT experience that basic safe care practices at the clinical level consume every opportunity for maintaining overarching quality goals, the unit stop lending help to others and start sacrificing continuity of care for individual patients. The plan for today is to admit one intermediary level patient that were born during the night and is waiting for a room at the NICU. One patient has been diagnosed with a multi-resistant bacterium and will need increased hygiene standards. One baby currently in another hospital are being assessed by a surgeon for the need of possible transport and surgery, one will possibly arrive by helicopter for eye surgery today. Three babies are planned for being transported back to their respective local hospitals, one by helicopter today and twins tomorrow (Observers notes after the coordinating management team's morning huddle).

- (Clinical coordinator) We are plenty of people today, that is nice. But when NN [strategic operations manager] asked if we had a lot of capacity, I had to say no.

The clinical coordinator checks the antenatal list of at-risk mothers who are under observation.

- (Clinical coordinator) Oh, there is a lot here, induction, ich... a lot of bleedings. There is a lot waiting... but you don't know when... It could be calm... I will not read all their charts.
- (Operations manager) ...one important thing. This baby that needed eye surgery is now acute and will arrive soon. They will land directly in the operating room and the transport team will take care of the baby until it can go back home its own hospital.
- (Strategic operations manager) Can we lend out some staff to [a neonatal ward in a neighbouring hospital].
- (Head nurse) I can check, we have plenty of staff, but they are all in use.

- 1  
2  
3 - (Strategic operations manager) I ask because they are not doing so well [the other unit].  
4 Twins are being born and they are asking for allowance and resources to move them to  
5 another region.  
6

7  
8 **Q3**

- 9 - (Clinical coordinator) This is not good, its full [the ward]. We have no space when this eye  
10 baby arrives.  
11

12  
13 The clinical coordinator walks to the room where a nurse oversees the twins that were supposed to  
14 be transported out the next day but are now showing symptoms of infection.  
15

- 16 - (Clinical coordinator) Lets' see when [Strategic operations manager] gets back, maybe we  
17 can send someone else.  
18 - (Nurse) But they went to fetch the week 31 from delivery to there [points to an empty cot].  
19 - (Clinical coordinator) Yes, and the eye baby is coming [points toward the 2<sup>nd</sup> empty place for  
20 a cot. Then its full here. Do you think these twins could be together in a twin cot?  
21 - (Nurse) Well, I don't know. This one is just on the margin of managing without incubator,  
22 and that one is getting treatment for bilirubin [treatment includes being exposed to light  
23 from a special lamp].  
24 - (Clinical coordinator) The problem is that I don't have staff to open another room.  
25 - (Nurse) Maybe if we reconsider the lamp-treatment..  
26 - (Clinical coordinator) Exactly, and then we hope that the eye baby can go back to his own  
27 hospital later in the evening.  
28  
29  
30  
31  
32  
33  
34  
35  
36  
37  
38  
39  
40  
41  
42  
43  
44  
45  
46  
47  
48  
49  
50  
51  
52  
53  
54  
55  
56  
57  
58  
59  
60

## Standards for Reporting Qualitative Research (SRQR)

O'Brien B.C., Harris, I.B., Beckman, T.J., Reed, D.A., & Cook, D.A. (2014). Standards for reporting qualitative research: a synthesis of recommendations. *Academic Medicine*, 89(9), 1245-1251.

| No. | Topic                                      | Item                                                                                                                                                                                                                                                                                                                                                                                             |
|-----|--------------------------------------------|--------------------------------------------------------------------------------------------------------------------------------------------------------------------------------------------------------------------------------------------------------------------------------------------------------------------------------------------------------------------------------------------------|
|     | <b>Title and abstract</b>                  |                                                                                                                                                                                                                                                                                                                                                                                                  |
| S1  | Title                                      | Concise description of the nature and topic of the study identifying the study as qualitative or indicating the approach (e.g., ethnography, grounded theory) or data collection methods (e.g., interview, focus group) is recommended<br><br><b>Qualitative descriptive study is part of the title.</b>                                                                                         |
| S2  | Abstract                                   | Summary of key elements of the study using the abstract format of the intended publication; typically includes objective, methods, results, and conclusions<br><br><b>The 300 words abstract contain objectives, design, participants, results and conclusions</b>                                                                                                                               |
|     | <b>Introduction</b>                        |                                                                                                                                                                                                                                                                                                                                                                                                  |
| S3  | Problem formulation                        | Description and significance of the problem/phenomenon studied; review of relevant theory and empirical work; problem statement<br><br><b>Problem statement on line 68-71 followed by relevant theory. Study Aim is located at line 90-92.</b>                                                                                                                                                   |
| S4  | Purpose or research question               | Purpose of the study and specific objectives or questions<br><br><b>The explorative qualitative design is guided by the study aim. A specific area for improvement in indicated on line 88-89.</b>                                                                                                                                                                                               |
|     | <b>Methods</b>                             |                                                                                                                                                                                                                                                                                                                                                                                                  |
| S5  | Qualitative approach and research paradigm | Qualitative approach (e.g., ethnography, grounded theory, case study, phenomenology, narrative research) and guiding theory if appropriate; identifying the research paradigm (e.g., positivist, constructivist/interpretivist) is also recommended<br><br><b>The ethnographic design and participatory observations are described in the methods section, sub headline "Design" line 95-99.</b> |
| S6  | Researcher characteristics and reflexivity | Researchers' characteristics that may influence the research, including personal attributes, qualifications/experience, relationship with participants, assumptions, or presuppositions; potential or actual interaction between researchers' characteristics and the research questions, approach, methods, results, or transferability                                                         |

|                                                  |                                                                                                                                                                                                                                                                                                                                                                                                                               |
|--------------------------------------------------|-------------------------------------------------------------------------------------------------------------------------------------------------------------------------------------------------------------------------------------------------------------------------------------------------------------------------------------------------------------------------------------------------------------------------------|
|                                                  | <p><b>The researchers characteristics is mentioned in the methodological bulletpoint on page 3 line 63-64 and further discussed in “Limitations” line 403-405. Trustworthiness is discussed in the second last paragraph in “Limitations”</b></p>                                                                                                                                                                             |
| S7 Context                                       | <p>Setting/site and salient contextual factors; rationale<sup>a</sup></p> <p><b>Setting is presented in the <i>introductions first paragraph</i> and a subheading under methods “Design and setting” Line 100-105.</b></p>                                                                                                                                                                                                    |
| S8 Sampling strategy                             | <p>How and why research participants, documents, or events were selected; criteria for deciding when no further sampling was necessary (e.g., sampling saturation); rationale<sup>a</sup></p> <p><b>The sample of data are mentioned in line 119-127. Saturation is not specifically discussed.</b></p>                                                                                                                       |
| S9 Ethical issues pertaining to human subjects   | <p>Documentation of approval by an appropriate ethics review board and participant consent, or explanation for lack thereof; other confidentiality and data security issues.</p> <p><b>Ethics approval information on line 436.</b></p>                                                                                                                                                                                       |
| S10 Data collection methods                      | <p>Types of data collected; details of data collection procedures including (as appropriate) start and stop dates of data collection and analysis, iterative process, triangulation of sources/methods, and modification of procedures in response to evolving study findings; rationale<sup>a</sup></p> <p><b>Data collection and data sources are presented in the methods section, sub-headline “Data collection”.</b></p> |
| S11 Data collection instruments and technologies | <p>Description of instruments (e.g., interview guides, questionnaires) and devices (e.g., audio recorders) used for data collection; if/how the instrument(s) changed over the course of the study</p> <p><b>Audio recording presented on line 137. Other instruments are not applicable in the ethnographic design.</b></p>                                                                                                  |
| S12 Units of study                               | <p>Number and relevant characteristics of participants, documents, or events included in the study; level of participation (could be reported in results)</p> <p><b>Not applicable in the ethnographic design, ample data is presented through quotes and appendix 1.</b></p>                                                                                                                                                 |
| S13 Data processing                              | <p>Methods for processing data prior to and during analysis, including transcription, data entry, data management and security, verification of data integrity, data coding, and anonymization/deidentification of excerpts</p> <p><b>Analysis and collection of data were iterated according to the study design.</b></p>                                                                                                    |
| S14 Data analysis                                | <p>Process by which inferences, themes, etc., were identified and developed, including researchers involved in data analysis; usually references a specific paradigm or approach; rationale<sup>a</sup></p> <p><b>Analysis method presented in line 141-152 and “table 1” for further transparency.</b></p>                                                                                                                   |
| S15 Techniques to enhance trustworthiness        | <p>Techniques to enhance trustworthiness and credibility of data analysis (e.g., member checking, audit trail, triangulation); rationale<sup>a</sup></p>                                                                                                                                                                                                                                                                      |

|                                                                                                  |                                                                                                                                                                                                                                                                                                                                                                                                                |
|--------------------------------------------------------------------------------------------------|----------------------------------------------------------------------------------------------------------------------------------------------------------------------------------------------------------------------------------------------------------------------------------------------------------------------------------------------------------------------------------------------------------------|
|                                                                                                  | <b>Trustworthiness discussed in line 405-411</b>                                                                                                                                                                                                                                                                                                                                                               |
| <b>Results/Findings</b>                                                                          |                                                                                                                                                                                                                                                                                                                                                                                                                |
| S16 Synthesis and interpretation                                                                 | Main findings (e.g., interpretations, inferences, and themes); might include development of a theory or model, or integration with prior research or theory<br><br><b>Results is based on an interpretation through a lens of the theoretical concept of resilience. Integration with theory is found in the discussion.</b>                                                                                   |
| S17 Links to empirical data                                                                      | Evidence (e.g., quotes, field notes, text excerpts, photographs) to substantiate analytic findings<br><br><b>Extensive quotes and field notes presented in results and appendix 1.</b>                                                                                                                                                                                                                         |
| <b>Discussion</b>                                                                                |                                                                                                                                                                                                                                                                                                                                                                                                                |
| S18 Integration with prior work, implications, transferability, and contribution(s) to the field | Short summary of main findings; explanation of how findings and conclusions connect to, support, elaborate on, or challenge conclusions of earlier scholarship; discussion of scope of application/generalizability; identification of unique contribution(s) to scholarship in a discipline or field<br><br><b>Integration with existing management theory for example in line 328-331, 358-360, 372-373.</b> |
| S19 Limitations                                                                                  | Trustworthiness and limitations of findings<br><br><b>Trustworthiness and limitations are discussed in lines 390-416</b>                                                                                                                                                                                                                                                                                       |
| <b>Other</b>                                                                                     |                                                                                                                                                                                                                                                                                                                                                                                                                |
| S20 Conflicts of interest                                                                        | Potential sources of influence or perceived influence on study conduct and conclusions; how these were managed<br><br><b>No competing interests line 445</b>                                                                                                                                                                                                                                                   |
| S21 Funding                                                                                      | Sources of funding and other support; role of funders in data collection, interpretation, and reporting<br><br><b>No specific funding line 447.</b>                                                                                                                                                                                                                                                            |

<sup>a</sup>The rationale should briefly discuss the justification for choosing that theory, approach, method, or technique rather than other options available, the assumptions and limitations implicit in those choices, and how those choices influence study conclusions and transferability. As appropriate, the rationale for several items might be discussed together
